# Supplementary material
Source: Elsevier journal article supplement (https://publikationen.ub.uni-frankfurt.de/files/78336/mmc3.xlsx)
Supplement: mmc3 [file mmc3.xlsx]

## Sheet: Sup. Table 2
Sup. Table 2: RNA-Seq of mLEC with or without ACF (10µM, 16h)
genes shown:	20439
Ensembl gene id	Ensembl gene	Ensembl biotype	Ensembl chr	Ensembl start	Ensembl stop	Ensembl strand	baseMean	baseMeanA ACF	baseMeanB DMSO	log2FC ACF/DMSO
ENSMUSG00000021175	Cdca7l	protein_coding	chr12	117843515	117878706	+	192	0	384	-8.58871
ENSMUSG00000075224	Lrrc55	protein_coding	chr2	85162334	85196699	-	715.5	8	1423	-7.30581
ENSMUSG00000086905	Gm13716	antisense_RNA	chr2	85196932	85198675	+	66.5	0	133	-7.06609
ENSMUSG00000104610	Gm567	lincRNA	chr3	137289639	137300708	+	55.5	0	111	-6.80735
ENSMUSG00000049321	Zfp2	protein_coding	chr11	50898712	50916165	-	51	0	102	-6.6865
ENSMUSG00000039706	Ldb2	protein_coding	chr5	44472132	44799680	-	2286.5	45	4528	-6.62141
ENSMUSG00000033453	Adamts15	protein_coding	chr9	30899155	30922452	-	95	1	189	-6.56986
ENSMUSG00000073755	5730409E04Rik	protein_coding	chr4	126609818	126614371	+	715.5	15	1416	-6.46862
ENSMUSG00000035062	Zc4h2	protein_coding	chrX	95639193	95658509	-	211	4	418	-6.38888
ENSMUSG00000067736	Gm10222	unprocessed_pseudogene	chr1	24612407	24612700	-	37	0	74	-6.22882
ENSMUSG00000032186	Tmod2	protein_coding	chr9	75565621	75611325	-	1786	49	3523	-6.13914
ENSMUSG00000028036	Ptgfr	protein_coding	chr3	151796502	151837630	-	105	2	208	-6.1224
ENSMUSG00000021185	9030617O03Rik	protein_coding	chr12	100779057	100872610	+	859	25	1693	-6.02578
ENSMUSG00000032715	Trib3	protein_coding	chr2	152337422	152344032	-	620.5	20	1221	-5.86271
ENSMUSG00000027661	Slc2a10	protein_coding	chr2	165503787	165519917	+	114	3	225	-5.82018
ENSMUSG00000027217	Tspan18	protein_coding	chr2	93201760	93334487	-	6074	216	11932	-5.78112
ENSMUSG00000044022	Pcdhb21	protein_coding	chr18	37513621	37518325	+	132.5	4	261	-5.71149
ENSMUSG00000105750	Gm43130	TEC	chr5	13481028	13484934	+	25	0	50	-5.67243
ENSMUSG00000051212	Gpr183	protein_coding	chr14	121952331	121965193	-	100.5	3	198	-5.63662
ENSMUSG00000001482	Def8	protein_coding	chr8	123442986	123463270	+	628.5	24	1233	-5.62527
ENSMUSG00000029790	Cep41	protein_coding	chr6	30653457	30693749	-	347	13	681	-5.60627
ENSMUSG00000045930	Clec14a	protein_coding	chr12	58264720	58269290	-	2876	119	5633	-5.55305
ENSMUSG00000047821	Trim16	protein_coding	chr11	62820231	62850808	+	1959	81	3837	-5.54859
ENSMUSG00000027499	Pkia	protein_coding	chr3	7366670	7445366	+	927	38	1816	-5.54194
ENSMUSG00000104626	Gm42675	TEC	chr5	13548694	13552728	+	22.5	0	45	-5.52356
ENSMUSG00000073000	Gm10451	lincRNA	chr12	76444497	76451336	+	45	1	89	-5.49185
ENSMUSG00000085135	Gm13713	antisense_RNA	chr2	85160778	85193325	+	22	0	44	-5.49185
ENSMUSG00000051627	Hist1h1e	protein_coding	chr13	23620629	23622558	-	953.5	41	1866	-5.47419
ENSMUSG00000035455	Fignl1	protein_coding	chr11	11800288	11808962	-	338	14	662	-5.46597
ENSMUSG00000001018	Snapin	protein_coding	chr3	90488034	90491033	-	503	22	984	-5.42042
ENSMUSG00000073590	3222401L13Rik	lincRNA	chr18	37655451	37661742	+	108	4	212	-5.41278
ENSMUSG00000041460	Cacna2d4	protein_coding	chr6	119236526	119352407	+	20.5	0	41	-5.39232
ENSMUSG00000045349	Sh2d5	protein_coding	chr4	138250403	138261332	+	426	19	833	-5.38198
ENSMUSG00000030268	Bcat1	protein_coding	chr6	144993835	145076184	-	381.5	17	746	-5.37504
ENSMUSG00000045790	Ccdc149	protein_coding	chr5	52374651	52471521	-	294	13	575	-5.36257
ENSMUSG00000097289	2010300F17Rik	lincRNA	chr11	96712982	96747436	-	271.5	12	531	-5.35484
ENSMUSG00000067430	Zfp763	protein_coding	chr17	33016863	33033402	-	142	6	278	-5.31677
ENSMUSG00000106603	Gm43509	TEC	chr5	44751164	44753757	-	19	0	38	-5.2854
ENSMUSG00000074754	Smim26	protein_coding	chr2	144594054	144595366	+	18.5	0	37	-5.24793
ENSMUSG00000063605	Ccdc102a	protein_coding	chr8	94902869	94918098	-	213	10	416	-5.24447
ENSMUSG00000052794	1700030K09Rik	protein_coding	chr8	72443880	72461001	+	95.5	4	187	-5.23266
ENSMUSG00000028549	Itgb3bp	protein_coding	chr4	99765402	99829186	-	75	3	147	-5.20945
ENSMUSG00000104894	Gm43507	antisense_RNA	chr5	44641484	44662153	+	37	1	73	-5.20945
ENSMUSG00000074165	Zfp788	protein_coding	chr7	41633531	41651530	+	187	9	365	-5.19377
ENSMUSG00000040658	Dnph1	protein_coding	chr17	46496789	46499618	+	36.5	1	72	-5.18982
ENSMUSG00000064262	Gimap8	protein_coding	chr6	48647234	48660875	+	1243.5	66	2421	-5.17589
ENSMUSG00000046470	Sox18	protein_coding	chr2	181669836	181671640	-	1907	105	3709	-5.12928
ENSMUSG00000032028	Nxpe2	protein_coding	chr9	48318006	48340898	-	35	1	69	-5.12928
ENSMUSG00000111529	AC154296.3	unprocessed_pseudogene	chr9	15321605	15322316	+	17	0	34	-5.12928
ENSMUSG00000064348	mt-Tn	Mt_tRNA	chrM	5089	5159	-	106.5	5	208	-5.1224
ENSMUSG00000050147	F2rl3	protein_coding	chr8	72761880	72763874	+	34	1	67	-5.08746
ENSMUSG00000108434	Gm45768	lincRNA	chr7	37317899	37321100	-	16.5	0	33	-5.08746
ENSMUSG00000048387	Osr1	protein_coding	chr12	9574441	9581500	+	103.5	5	202	-5.08037
ENSMUSG00000056014	A430033K04Rik	protein_coding	chr5	138622859	138652414	+	171.5	9	334	-5.06609
ENSMUSG00000111398	AC107851.2	processed_transcript	chr9	115665914	115674353	+	33.5	1	66	-5.06609
ENSMUSG00000015291	Gdi1	protein_coding	chrX	74304998	74311862	+	1907	112	3702	-5.0343
ENSMUSG00000069835	Sat2	protein_coding	chr11	69622024	69623870	+	32.5	1	64	-5.02237
ENSMUSG00000036800	Fam135b	protein_coding	chr15	71445678	71727838	-	99	5	193	-5.01495
ENSMUSG00000024803	Ankrd1	protein_coding	chr19	36111965	36119844	-	2138.5	128	4149	-5.00767
ENSMUSG00000046207	Pik3r6	protein_coding	chr11	68503019	68552698	+	15	0	30	-4.9542
ENSMUSG00000037991	Rmi2	protein_coding	chr16	10835059	10843238	+	15	0	30	-4.9542
ENSMUSG00000085440	Sorbs2os	antisense_RNA	chr8	45723325	45819297	-	62.5	3	122	-4.94251
ENSMUSG00000038264	Sema7a	protein_coding	chr9	57940113	57962865	+	4391	277	8505	-4.93532
ENSMUSG00000018169	Mfng	protein_coding	chr15	78755882	78773475	-	353	22	684	-4.8964
ENSMUSG00000052373	Mpp3	protein_coding	chr11	101999652	102028461	-	45	2	88	-4.89077
ENSMUSG00000069763	Tmem100	protein_coding	chr11	90030348	90036508	+	60	3	117	-4.88264
ENSMUSG00000051235	Gen1	protein_coding	chr12	11238920	11265766	-	270.5	17	524	-4.86625
ENSMUSG00000021367	Edn1	protein_coding	chr13	42301476	42307990	+	8051	535	15567	-4.86021
ENSMUSG00000074829	2010315B03Rik	protein_coding	chr9	124291804	124312696	-	177.5	11	344	-4.84549
ENSMUSG00000032783	Troap	protein_coding	chr15	99074973	99083407	+	58.5	3	114	-4.84549
ENSMUSG00000004609	Cd33	protein_coding	chr7	43524216	43544428	-	501.5	33	970	-4.83586
ENSMUSG00000097519	4930558J18Rik	lincRNA	chr1	57359222	57377544	-	28.5	1	56	-4.83289
ENSMUSG00000112398	AC131677.1	lincRNA	chr10	110600650	110615961	+	28	1	55	-4.80735
ENSMUSG00000035165	Kcne3	protein_coding	chr7	100176679	100184869	+	880	60	1700	-4.80143
ENSMUSG00000110426	Gm45757	TEC	chr8	95045981	95047460	+	13	0	26	-4.75489
ENSMUSG00000074067	Gm10619	lincRNA	chr7	73781429	73816503	-	13	0	26	-4.75489
ENSMUSG00000026278	Bok	protein_coding	chr1	93685660	93695764	+	208	14	402	-4.74775
ENSMUSG00000038644	Pold1	protein_coding	chr7	44532746	44548847	-	263	18	508	-4.74359
ENSMUSG00000038188	Scarf1	protein_coding	chr11	75513540	75526582	+	1765	127	3403	-4.73302
ENSMUSG00000064349	mt-Tc	Mt_tRNA	chrM	5192	5257	-	54	3	105	-4.72792
ENSMUSG00000028226	Mmp16	protein_coding	chr4	17853458	18119145	+	12.5	0	25	-4.70044
ENSMUSG00000025007	Aldh18a1	protein_coding	chr19	40550257	40588463	-	928	68	1788	-4.69641
ENSMUSG00000020736	Nt5c	protein_coding	chr11	115490420	115491862	-	3334	252	6416	-4.66469
ENSMUSG00000069727	Zfp975	protein_coding	chr7	42660105	42692718	-	222	16	428	-4.65737
ENSMUSG00000047342	Zfp286	protein_coding	chr11	62752577	62789462	-	64.5	4	125	-4.65535
ENSMUSG00000112461	AC166836.1	TEC	chr10	116284549	116286343	+	25	1	49	-4.64386
ENSMUSG00000097068	Gm26760	lincRNA	chr15	92344359	92378088	+	12	0	24	-4.64386
ENSMUSG00000091568	Gm8206	protein_coding	chr14	6016759	6093942	-	12	0	24	-4.64386
ENSMUSG00000087424	5730405O15Rik	processed_transcript	chrX	13042015	13045210	+	24.5	1	48	-4.61471
ENSMUSG00000105861	Gm43508	TEC	chr5	44623919	44627701	-	37	2	72	-4.60486
ENSMUSG00000102448	Gm37101	TEC	chr1	138567697	138571356	-	11.5	0	23	-4.58496
ENSMUSG00000026245	Farsb	protein_coding	chr1	78417975	78488897	-	944.5	75	1814	-4.57783
ENSMUSG00000086968	4933431E20Rik	antisense_RNA	chr3	107888850	107896213	-	86	6	166	-4.57635
ENSMUSG00000020734	Grin2c	protein_coding	chr11	115249169	115267243	-	110.5	8	213	-4.57154
ENSMUSG00000039759	Thap3	protein_coding	chr4	151982639	151988997	-	48	3	93	-4.55459
ENSMUSG00000039043	Arpin	protein_coding	chr7	79925361	79935359	-	427	34	820	-4.55196
ENSMUSG00000007039	Ddah2	protein_coding	chr17	35059035	35062095	+	327	26	628	-4.54203
ENSMUSG00000112980	CT030173.1	bidirectional_promoter_lncRNA	chr12	116401947	116405210	-	131	10	252	-4.52356
ENSMUSG00000103482	Gm37999	TEC	chr1	32473757	32475565	+	11	0	22	-4.52356
ENSMUSG00000098206	A430106G13Rik	lincRNA	chr1	137966531	137969918	+	11	0	22	-4.52356
ENSMUSG00000050666	Vstm4	protein_coding	chr14	32856756	32939487	+	11	0	22	-4.52356
ENSMUSG00000031165	Was	protein_coding	chrX	8081453	8090498	-	11	0	22	-4.52356
ENSMUSG00000030144	Clec4d	protein_coding	chr6	123262117	123275265	+	11	0	22	-4.52356
ENSMUSG00000042389	Tsen2	protein_coding	chr6	115544664	115578628	+	130.5	10	251	-4.51785
ENSMUSG00000028803	Nipal3	protein_coding	chr4	135446137	135494623	-	361	30	692	-4.48252
ENSMUSG00000034041	Lyl1	protein_coding	chr8	84701457	84704715	+	104	8	200	-4.48113
ENSMUSG00000020914	Top2a	protein_coding	chr11	98992943	99024189	-	3177.5	273	6082	-4.47254
ENSMUSG00000044921	Rassf9	protein_coding	chr10	102512222	102549736	+	2137.5	184	4091	-4.46721
ENSMUSG00000097429	Gm26520	lincRNA	chr12	3343816	3357153	-	10.5	0	21	-4.45943
ENSMUSG00000051998	Lax1	protein_coding	chr1	133679091	133690108	-	10.5	0	21	-4.45943
ENSMUSG00000047415	Gpr68	protein_coding	chr12	100876682	100908198	-	10.5	0	21	-4.45943
ENSMUSG00000022540	Rogdi	protein_coding	chr16	5008730	5013527	-	67.5	5	130	-4.44846
ENSMUSG00000027634	Ndrg3	protein_coding	chr2	156927345	156992056	-	1280.5	112	2449	-4.43839
ENSMUSG00000006720	Zfp184	protein_coding	chr13	21945094	21960779	+	55.5	4	107	-4.43296
ENSMUSG00000105041	Gm42676	TEC	chr5	13525723	13528408	+	21.5	1	42	-4.42626
ENSMUSG00000048040	Arxes2	protein_coding	chrX	135993824	135995355	+	21.5	1	42	-4.42626
ENSMUSG00000028687	Mutyh	protein_coding	chr4	116807723	116819431	+	21	1	41	-4.39232
ENSMUSG00000111929	AC154585.1	antisense_RNA	chr12	79150936	79151932	-	10	0	20	-4.39232
ENSMUSG00000105877	Gm42479	TEC	chr5	57925620	57926975	+	10	0	20	-4.39232
ENSMUSG00000105347	Gm43503	TEC	chr5	44680194	44683601	-	10	0	20	-4.39232
ENSMUSG00000072589	Gm10371	antisense_RNA	chr14	47097679	47116161	-	10	0	20	-4.39232
ENSMUSG00000027314	Dll4	protein_coding	chr2	119325784	119335962	+	161	14	308	-4.36457
ENSMUSG00000104990	Gm43504	TEC	chr5	44664694	44666731	-	20.5	1	40	-4.35755
ENSMUSG00000022235	Cmbl	protein_coding	chr15	31568905	31590119	+	202.5	18	387	-4.35199
ENSMUSG00000014164	Klhl3	protein_coding	chr13	58000228	58113592	-	3075.5	287	5864	-4.34799
ENSMUSG00000055065	Ddx17	protein_coding	chr15	79527707	79546741	-	5097	482	9712	-4.32982
ENSMUSG00000105136	8030487O14Rik	TEC	chr5	44513658	44514560	-	9.5	0	19	-4.32193
ENSMUSG00000103932	Gm36963	TEC	chr16	77539882	77542205	+	9.5	0	19	-4.32193
ENSMUSG00000073705	Apitd1	protein_coding	chr4	149128198	149137629	-	51	4	98	-4.30743
ENSMUSG00000067219	Nipal1	protein_coding	chr5	72647795	72671078	+	1110	107	2113	-4.29087
ENSMUSG00000022677	Fopnl	protein_coding	chr16	14299244	14317375	-	263.5	25	502	-4.27397
ENSMUSG00000040146	Rgl3	protein_coding	chr9	21971527	21989446	-	39.5	3	76	-4.26679
ENSMUSG00000020420	Zfp607a	protein_coding	chr7	27857527	27880825	+	69.5	6	133	-4.25873
ENSMUSG00000069184	Zfp72	protein_coding	chr13	74369326	74390836	-	229.5	22	437	-4.25123
ENSMUSG00000025887	Casp12	protein_coding	chr9	5345430	5373032	+	279.5	27	532	-4.25064
ENSMUSG00000047307	Pcdhb13	protein_coding	chr18	37442500	37446209	+	39	3	75	-4.24793
ENSMUSG00000105044	Gm10416	TEC	chr5	109833501	109834145	-	9	0	18	-4.24793
ENSMUSG00000031169	Porcn	protein_coding	chrX	8193848	8206525	-	9	0	18	-4.24793
ENSMUSG00000054434	Tmem120b	protein_coding	chr5	123076275	123117749	+	258	25	491	-4.24207
ENSMUSG00000098178	Gm42418	lincRNA	chr17	39846958	39848788	+	215	21	409	-4.22005
ENSMUSG00000046280	She	protein_coding	chr3	89831370	89858834	+	3621	368	6874	-4.21967
ENSMUSG00000021252	Erg28	protein_coding	chr12	85815448	85824522	-	264	26	502	-4.21953
ENSMUSG00000030157	Clec2d	protein_coding	chr6	129180615	129186534	+	792.5	80	1505	-4.21666
ENSMUSG00000061666	Gdpd1	protein_coding	chr11	87033867	87074062	-	312	31	593	-4.21432
ENSMUSG00000105366	Gm43719	TEC	chr5	13604035	13606233	+	125.5	12	239	-4.20645
ENSMUSG00000066829	Zfp810	protein_coding	chr9	22276748	22307648	-	259	26	492	-4.19056
ENSMUSG00000037455	Slc18b1	protein_coding	chr10	23796986	23827968	+	122.5	12	233	-4.16993
ENSMUSG00000021608	Lpcat1	protein_coding	chr13	73467197	73516422	+	1426	150	2702	-4.16194
ENSMUSG00000054435	Gimap4	protein_coding	chr6	48684549	48692060	+	1933	204	3662	-4.15933
ENSMUSG00000052384	Nrros	protein_coding	chr16	32142785	32165585	-	46	4	88	-4.15381
ENSMUSG00000054115	Skp2	protein_coding	chr15	9111985	9155424	-	468.5	49	888	-4.15218
ENSMUSG00000041298	Katnal1	protein_coding	chr5	148871584	148928647	-	593.5	64	1123	-4.11206
ENSMUSG00000039410	Prdm16	protein_coding	chr4	154316125	154636866	-	72	7	137	-4.10852
ENSMUSG00000054619	Mettl7a1	protein_coding	chr15	100304817	100314348	+	90	9	171	-4.10434
ENSMUSG00000103332	Pcdhga2	protein_coding	chr18	37668953	37841870	+	71.5	7	136	-4.09803
ENSMUSG00000047180	Neurl3	protein_coding	chr1	36264597	36274679	-	1020.5	112	1929	-4.09421
ENSMUSG00000110213	Gm45628	processed_pseudogene	chr7	46915990	46916263	+	8	0	16	-4.08746
ENSMUSG00000108185	Gm19653	processed_pseudogene	chr6	97449750	97451486	+	8	0	16	-4.08746
ENSMUSG00000049086	Bmyc	protein_coding	chr2	25706739	25707721	+	8	0	16	-4.08746
ENSMUSG00000048728	Zfp454	protein_coding	chr11	50872720	50887501	-	8	0	16	-4.08746
ENSMUSG00000024866	Acy3	protein_coding	chr19	3986661	3990007	+	106.5	11	202	-4.08037
ENSMUSG00000039304	Tnfsf10	protein_coding	chr3	27317028	27342427	+	88	9	167	-4.07039
ENSMUSG00000074476	Spc24	protein_coding	chr9	21755442	21760303	-	86.5	9	164	-4.04439
ENSMUSG00000044408	Sptssa	protein_coding	chr12	54645392	54656573	-	672	76	1268	-4.04269
ENSMUSG00000025381	Cnpy2	protein_coding	chr10	128322459	128327553	+	322	36	608	-4.04085
ENSMUSG00000037892	Pcdh18	protein_coding	chr3	49743296	49757316	-	95	10	180	-4.04041
ENSMUSG00000028251	Tstd3	protein_coding	chr4	21757382	21767212	-	268.5	30	507	-4.03449
ENSMUSG00000055555	4930502E18Rik	protein_coding	chrX	53724826	53738441	+	25	2	48	-4.02975
ENSMUSG00000062075	Lmnb2	protein_coding	chr10	80901203	80918245	-	325.5	37	614	-4.01652
ENSMUSG00000001946	Esam	protein_coding	chr9	37528078	37538319	+	2057.5	241	3874	-4.00112
ENSMUSG00000050395	Tnfsf15	protein_coding	chr4	63727084	63745113	-	16	1	31	-4
ENSMUSG00000113843	AC129019.2	processed_pseudogene	chr13	34393724	34394524	-	7.5	0	15	-4
ENSMUSG00000107559	Gm44193	TEC	chr6	112293231	112295753	+	7.5	0	15	-4
ENSMUSG00000104150	Gm44573	TEC	chr7	39542537	39544906	-	7.5	0	15	-4
ENSMUSG00000077191	Snord64	snoRNA	chr7	59978808	59978874	-	7.5	0	15	-4
ENSMUSG00000045075	Gm9796	lincRNA	chr11	95696894	95699143	-	7.5	0	15	-4
ENSMUSG00000028391	Wdr31	protein_coding	chr4	62452632	62470887	-	7.5	0	15	-4
ENSMUSG00000020335	Zfp354b	protein_coding	chr11	50921823	50931633	-	7.5	0	15	-4
ENSMUSG00000023015	Racgap1	protein_coding	chr15	99620496	99651656	-	609	71	1147	-3.99498
ENSMUSG00000061353	Cxcl12	protein_coding	chr6	117168535	117181367	+	7163.5	854	13473	-3.97811
ENSMUSG00000113031	AC158365.1	lincRNA	chr12	74314201	74317162	-	15.5	1	30	-3.9542
ENSMUSG00000056665	Them6	protein_coding	chr15	74721204	74724639	+	15.5	1	30	-3.9542
ENSMUSG00000048191	Muc6	protein_coding	chr7	141633456	141655319	-	15.5	1	30	-3.9542
ENSMUSG00000055612	Cdca7	protein_coding	chr2	72476159	72486893	+	304	36	572	-3.95294
ENSMUSG00000047749	Zc3hav1l	protein_coding	chr6	38287396	38299259	-	204.5	24	385	-3.9486
ENSMUSG00000021575	Ahrr	protein_coding	chr13	74211118	74292331	-	2898.5	352	5445	-3.94746
ENSMUSG00000047910	Pcdhb16	protein_coding	chr18	37477814	37483038	+	424.5	51	798	-3.94161
ENSMUSG00000039356	Exosc2	protein_coding	chr2	31670715	31681349	+	577.5	70	1085	-3.93506
ENSMUSG00000056758	Hmga2	protein_coding	chr10	120361275	120476469	-	9863	1214	18512	-3.92951
ENSMUSG00000037358	4930578C19Rik	protein_coding	chrX	18418427	18461371	-	39.5	4	75	-3.926
ENSMUSG00000097352	C920009B18Rik	transcribed_unprocessed_pseudogene	chr10	22306702	22321765	+	31	3	59	-3.90689
ENSMUSG00000112134	AC155637.1	lincRNA	chr10	83344513	83351079	+	7	0	14	-3.90689
ENSMUSG00000107534	Gm43920	sense_intronic	chr6	83962277	83965048	+	7	0	14	-3.90689
ENSMUSG00000106332	Gm43506	TEC	chr5	44516961	44517713	-	7	0	14	-3.90689
ENSMUSG00000103089	Gm38118	TEC	chr1	193259616	193261837	-	7	0	14	-3.90689
ENSMUSG00000102882	Gm2065	TEC	chr9	83114108	83116864	+	7	0	14	-3.90689
ENSMUSG00000043753	Dmrta1	protein_coding	chr4	89688198	89694772	+	7	0	14	-3.90689
ENSMUSG00000028655	Mfsd2a	protein_coding	chr4	122946850	122961188	-	7	0	14	-3.90689
ENSMUSG00000057329	Bcl2	protein_coding	chr1	106538178	106714274	-	726	90	1362	-3.90478
ENSMUSG00000022800	Fyttd1	protein_coding	chr16	32877781	32908963	+	2400.5	302	4499	-3.89254
ENSMUSG00000040795	Iqcc	protein_coding	chr4	129615126	129619099	-	260.5	32	489	-3.89224
ENSMUSG00000034055	Phka1	protein_coding	chrX	102513975	102644246	-	462.5	58	867	-3.87891
ENSMUSG00000094786	Gm14403	protein_coding	chr2	177498315	177509763	+	107.5	13	202	-3.85798
ENSMUSG00000040121	Rep15	protein_coding	chr6	147032584	147034245	+	37.5	4	71	-3.848
ENSMUSG00000026321	Tnfrsf11a	protein_coding	chr1	105780718	105847981	+	91	11	171	-3.8413
ENSMUSG00000029176	Anapc4	protein_coding	chr5	52834012	52867797	+	2228.5	290	4167	-3.84026
ENSMUSG00000031377	Bmx	protein_coding	chrX	164192842	164258193	-	113	14	212	-3.82782
ENSMUSG00000051855	Mest	protein_coding	chr6	30733506	30748465	+	2299	305	4293	-3.81072
ENSMUSG00000111292	AC159308.4	TEC	chr9	22294222	22295572	-	6.5	0	13	-3.80735
ENSMUSG00000106646	Gm42483	TEC	chr5	58047331	58049072	+	6.5	0	13	-3.80735
ENSMUSG00000104821	Gm42481	TEC	chr5	57778873	57781050	+	6.5	0	13	-3.80735
ENSMUSG00000102383	Gm38142	TEC	chr1	86826101	86829655	+	6.5	0	13	-3.80735
ENSMUSG00000098158	Gm4804	transcribed_processed_pseudogene	chr12	15606412	15729095	+	6.5	0	13	-3.80735
ENSMUSG00000091007	D630036H23Rik	protein_coding	chr12	36381242	36382181	-	6.5	0	13	-3.80735
ENSMUSG00000082001	Gm15607	processed_pseudogene	chr5	135637139	135637496	-	6.5	0	13	-3.80735
ENSMUSG00000049593	Lce1h	protein_coding	chr3	92763215	92765065	-	6.5	0	13	-3.80735
ENSMUSG00000045657	Pcdhb10	protein_coding	chr18	37411664	37414514	+	6.5	0	13	-3.80735
ENSMUSG00000022340	Sybu	protein_coding	chr15	44671859	44788063	-	6.5	0	13	-3.80735
ENSMUSG00000038793	Lefty1	protein_coding	chr1	180935022	180938400	+	43.5	5	82	-3.79008
ENSMUSG00000004880	Lbr	protein_coding	chr1	181815335	181842379	-	629	84	1174	-3.78905
ENSMUSG00000056679	Gpr173	protein_coding	chrX	152343598	152368704	-	65.5	8	123	-3.78427
ENSMUSG00000033809	Alg3	protein_coding	chr16	20605451	20610768	-	117	15	219	-3.78136
ENSMUSG00000024663	Rab3il1	protein_coding	chr19	10001669	10035586	+	485	65	905	-3.77897
ENSMUSG00000029836	Cbx3	protein_coding	chr6	51470360	51483704	+	109	14	204	-3.77259
ENSMUSG00000020808	Pimreg	protein_coding	chr11	72042455	72047370	+	108.5	14	203	-3.76553
ENSMUSG00000015468	Notch4	protein_coding	chr17	34564268	34588503	+	2024.5	277	3772	-3.76256
ENSMUSG00000096210	H1f0	protein_coding	chr15	79028212	79030498	+	1435	197	2673	-3.75543
ENSMUSG00000038564	Ift172	protein_coding	chr5	31253277	31291116	-	390.5	53	728	-3.75489
ENSMUSG00000046618	Olfml2a	protein_coding	chr2	38931978	38963753	+	373.5	51	696	-3.74458
ENSMUSG00000001228	Uhrf1	protein_coding	chr17	56303321	56323486	+	856	118	1594	-3.74452
ENSMUSG00000020766	Galk1	protein_coding	chr11	116008457	116012719	-	200	27	373	-3.73954
ENSMUSG00000031907	Zfp90	protein_coding	chr8	106415339	106425895	+	20.5	2	39	-3.73697
ENSMUSG00000020377	Ltc4s	protein_coding	chr11	50236469	50238532	-	20.5	2	39	-3.73697
ENSMUSG00000078945	Naip2	protein_coding	chr13	100144063	100202092	-	113	15	211	-3.72792
ENSMUSG00000036941	Elac1	protein_coding	chr18	73735038	73754479	-	219	30	408	-3.72176
ENSMUSG00000078695	Cisd3	protein_coding	chr11	97685826	97688621	+	34	4	64	-3.70044
ENSMUSG00000112406	AC168315.3	antisense_RNA	chr10	88135919	88137531	+	6	0	12	-3.70044
ENSMUSG00000109909	Gm45663	TEC	chr8	104152706	104154337	+	6	0	12	-3.70044
ENSMUSG00000108305	Gm19078	processed_pseudogene	chr6	71918899	71919844	-	6	0	12	-3.70044
ENSMUSG00000107161	Gm43850	processed_pseudogene	chr5	33255318	33256362	+	6	0	12	-3.70044
ENSMUSG00000101144	Gm29054	processed_transcript	chr9	83145946	83147281	+	6	0	12	-3.70044
ENSMUSG00000088308	Gm24507	snoRNA	chr13	90098981	90099114	+	6	0	12	-3.70044
ENSMUSG00000082383	Gm9670	processed_pseudogene	chrX	103506812	103507589	+	6	0	12	-3.70044
ENSMUSG00000075553	Gm5464	protein_coding	chr14	66868850	66871005	+	6	0	12	-3.70044
ENSMUSG00000006732	Mettl1	protein_coding	chr10	127041932	127046365	+	215	30	400	-3.69326
ENSMUSG00000018008	Cyth4	protein_coding	chr15	78597047	78622019	+	744.5	106	1383	-3.69316
ENSMUSG00000034800	Zfp661	protein_coding	chr2	127574662	127587094	-	82.5	11	154	-3.69116
ENSMUSG00000028883	Sema3a	protein_coding	chr5	13396784	13602565	+	6547.5	944	12151	-3.68474
ENSMUSG00000050493	Fam167b	protein_coding	chr4	129576815	129578549	-	40.5	5	76	-3.68182
ENSMUSG00000050382	Kif7	protein_coding	chr7	79698098	79715720	-	40.5	5	76	-3.68182
ENSMUSG00000108350	Gm44950	TEC	chr7	79922572	79924867	-	95.5	13	178	-3.67646
ENSMUSG00000030717	Nupr1	protein_coding	chr7	126623249	126625676	-	88.5	12	165	-3.6746
ENSMUSG00000046152	Fut10	protein_coding	chr8	31187331	31261738	+	260	37	483	-3.67094
ENSMUSG00000106633	Gm43431	processed_pseudogene	chr5	88423215	88423554	+	19.5	2	37	-3.66297
ENSMUSG00000082082	Gm13230	transcribed_unprocessed_pseudogene	chr4	145446740	145450888	+	19.5	2	37	-3.66297
ENSMUSG00000074715	Ccl28	protein_coding	chr13	119623819	119654359	+	33	4	62	-3.65535
ENSMUSG00000020828	Pld2	protein_coding	chr11	70540306	70558110	+	417.5	61	774	-3.64386
ENSMUSG00000002012	Pnck	protein_coding	chrX	73655994	73660117	-	12.5	1	24	-3.64386
ENSMUSG00000048706	Lurap1l	protein_coding	chr4	80910646	80955628	+	32.5	4	61	-3.63227
ENSMUSG00000031730	Dhodh	protein_coding	chr8	109593477	109608623	-	119	17	221	-3.62449
ENSMUSG00000061111	Mcrip1	protein_coding	chr11	120542888	120549727	-	224.5	33	416	-3.61644
ENSMUSG00000054892	Txk	protein_coding	chr5	72695978	72752777	-	85	12	158	-3.61244
ENSMUSG00000019990	Pde7b	protein_coding	chr10	20398004	20725078	-	2602	395	4809	-3.60246
ENSMUSG00000113619	AC154635.1	antisense_RNA	chr13	42302298	42304991	-	91	13	169	-3.60204
ENSMUSG00000030247	Kcnj8	protein_coding	chr6	142564837	142571614	-	104	15	193	-3.59991
ENSMUSG00000009614	Sardh	protein_coding	chr2	27188393	27247266	-	326	49	603	-3.59455
ENSMUSG00000021013	Ttc8	protein_coding	chr12	98920574	98983238	+	280	42	518	-3.59333
ENSMUSG00000009633	G0s2	protein_coding	chr1	193272161	193273217	-	31.5	4	59	-3.58496
ENSMUSG00000097620	4921514A10Rik	antisense_RNA	chr4	141115660	141118087	+	12	1	23	-3.58496
ENSMUSG00000114150	AC132954.5	processed_transcript	chr12	83823455	83842087	+	5.5	0	11	-3.58496
ENSMUSG00000105431	Gm42640	TEC	chr5	57961594	57962788	+	5.5	0	11	-3.58496
ENSMUSG00000105050	Gm42482	TEC	chr5	57798503	57800449	+	5.5	0	11	-3.58496
ENSMUSG00000104937	Gm43057	lincRNA	chr5	86767141	86783033	-	5.5	0	11	-3.58496
ENSMUSG00000104018	4833412K13Rik	TEC	chr1	78465448	78466926	-	5.5	0	11	-3.58496
ENSMUSG00000093424	6330562C20Rik	antisense_RNA	chr3	95307672	95315117	-	5.5	0	11	-3.58496
ENSMUSG00000089214	Mir1931	miRNA	chr10	93162785	93162903	+	5.5	0	11	-3.58496
ENSMUSG00000088169	Gm22059	snoRNA	chr11	98710986	98711089	-	5.5	0	11	-3.58496
ENSMUSG00000031616	Ednra	protein_coding	chr8	77663031	77724436	-	5.5	0	11	-3.58496
ENSMUSG00000071112	Spx	protein_coding	chr6	142413441	142419730	+	667.5	102	1233	-3.58263
ENSMUSG00000045954	Cavin2	protein_coding	chr1	51289126	51302960	+	18108	2801	33415	-3.57601
ENSMUSG00000032440	Tgfbr2	protein_coding	chr9	116084293	116175360	-	25456	3943	46969	-3.57401
ENSMUSG00000032123	Dpagt1	protein_coding	chr9	44326845	44333900	+	586	90	1082	-3.57302
ENSMUSG00000023243	Kcnk5	protein_coding	chr14	20140057	20181809	-	108.5	16	201	-3.57075
ENSMUSG00000020629	Adi1	protein_coding	chr12	28675231	28682175	+	127	19	235	-3.56071
ENSMUSG00000026921	Egfl7	protein_coding	chr2	26581056	26592684	+	3878.5	607	7150	-3.556
ENSMUSG00000097994	Gm26982	antisense_RNA	chr6	113714971	113716121	+	24.5	3	46	-3.55459
ENSMUSG00000029992	Gfpt1	protein_coding	chr6	87042846	87092197	+	3022.5	474	5571	-3.5522
ENSMUSG00000071176	Arhgef10	protein_coding	chr8	14911663	15001085	+	1031	162	1900	-3.54381
ENSMUSG00000029427	Zcchc8	protein_coding	chr5	123698294	123721100	-	1076.5	170	1983	-3.53634
ENSMUSG00000075318	Scn2a	protein_coding	chr2	65620771	65767447	+	30.5	4	57	-3.53605
ENSMUSG00000020493	Prr11	protein_coding	chr11	87089153	87108708	-	465	73	857	-3.53538
ENSMUSG00000048503	Tmem136	protein_coding	chr9	43108650	43116570	-	93	14	172	-3.52774
ENSMUSG00000026999	Nup35	protein_coding	chr2	80638816	80658902	+	36.5	5	68	-3.52356
ENSMUSG00000035561	Aldh1b1	protein_coding	chr4	45799022	45804604	+	24	3	45	-3.52356
ENSMUSG00000104951	Gm43413	TEC	chr5	123110696	123112261	+	11.5	1	22	-3.52356
ENSMUSG00000097073	9430037G07Rik	lincRNA	chr9	88595325	88599243	-	11.5	1	22	-3.52356
ENSMUSG00000022048	Dpysl2	protein_coding	chr14	66802864	66868688	-	6095	980	11210	-3.51452
ENSMUSG00000023961	Enpp4	protein_coding	chr17	44096308	44105809	-	818.5	131	1506	-3.51307
ENSMUSG00000103144	Pcdhga1	protein_coding	chr18	37661793	37841873	+	61	9	113	-3.51096
ENSMUSG00000031255	Sytl4	protein_coding	chrX	133936385	133981812	-	270	43	497	-3.50057
ENSMUSG00000063802	Hspbp1	protein_coding	chr7	4660521	4685068	-	233	37	429	-3.50027
ENSMUSG00000090019	Gimap1	protein_coding	chr6	48739054	48743794	+	245	39	451	-3.49825
ENSMUSG00000039018	Mtg1	protein_coding	chr7	140137564	140150786	+	140	22	258	-3.49325
ENSMUSG00000049439	Cyp20a1	protein_coding	chr1	60343323	60388060	+	1206	196	2216	-3.49234
ENSMUSG00000046179	E2f8	protein_coding	chr7	48866429	48881596	-	453.5	74	833	-3.47508
ENSMUSG00000028029	Aimp1	protein_coding	chr3	132660499	132683884	-	495	81	909	-3.47217
ENSMUSG00000007646	Rad51c	protein_coding	chr11	87376645	87404954	-	71.5	11	132	-3.47032
ENSMUSG00000022386	Trmu	protein_coding	chr15	85879320	85897392	+	83.5	13	154	-3.46877
ENSMUSG00000005225	Plekha8	protein_coding	chr6	54595111	54645839	+	828	137	1519	-3.46133
ENSMUSG00000060314	Zfp941	protein_coding	chr7	140807449	140822178	-	131	21	241	-3.45943
ENSMUSG00000027859	Ngf	protein_coding	chr3	102469919	102521013	+	65	10	120	-3.45943
ENSMUSG00000089901	Gm8113	protein_coding	chr14	43925390	43933411	+	11	1	21	-3.45943
ENSMUSG00000084844	Hoxb3os	antisense_RNA	chr11	96343072	96354691	-	11	1	21	-3.45943
ENSMUSG00000113871	AC134439.2	processed_pseudogene	chr13	95002358	95002824	+	5	0	10	-3.45943
ENSMUSG00000113126	AC130827.1	TEC	chr13	63410918	63414767	-	5	0	10	-3.45943
ENSMUSG00000113058	AC154517.1	antisense_RNA	chr12	13484808	13487047	-	5	0	10	-3.45943
ENSMUSG00000111834	AL928687.1	processed_pseudogene	chr2	85898910	85900544	-	5	0	10	-3.45943
ENSMUSG00000103805	Gm37063	TEC	chr16	77476934	77480453	+	5	0	10	-3.45943
ENSMUSG00000102211	Gm37490	TEC	chr1	176889507	176890230	+	5	0	10	-3.45943
ENSMUSG00000094263	Snord50a	snoRNA	chr9	88521529	88521600	-	5	0	10	-3.45943
ENSMUSG00000093042	Mir3109	miRNA	chr9	69456944	69457031	+	5	0	10	-3.45943
ENSMUSG00000088351	Gm24016	snoRNA	chr4	3835079	3835146	-	5	0	10	-3.45943
ENSMUSG00000082686	Gm12961	processed_pseudogene	chr4	111790621	111791670	-	5	0	10	-3.45943
ENSMUSG00000081585	Gm12926	processed_pseudogene	chr4	123630295	123630703	+	5	0	10	-3.45943
ENSMUSG00000065501	Mir335	miRNA	chr6	30741299	30741396	+	5	0	10	-3.45943
ENSMUSG00000064995	Gm26003	snoRNA	chr2	158358360	158358472	-	5	0	10	-3.45943
ENSMUSG00000054203	Ifi205	protein_coding	chr1	174011998	174031755	-	5	0	10	-3.45943
ENSMUSG00000045589	Frrs1l	protein_coding	chr4	56957173	56990391	-	5	0	10	-3.45943
ENSMUSG00000035390	Brsk1	protein_coding	chr7	4690604	4715997	+	5	0	10	-3.45943
ENSMUSG00000026959	Grin1	protein_coding	chr2	25291181	25319187	-	5	0	10	-3.45943
ENSMUSG00000000317	Bcl6b	protein_coding	chr11	70224128	70229739	-	2277	379	4175	-3.45805
ENSMUSG00000034911	Ushbp1	protein_coding	chr8	71385369	71395785	-	352	58	646	-3.45498
ENSMUSG00000025494	Sigirr	protein_coding	chr7	141091175	141100546	-	52.5	8	97	-3.44478
ENSMUSG00000030787	Lyve1	protein_coding	chr7	110850607	110863239	-	22371	3765	40977	-3.44374
ENSMUSG00000030272	Camk1	protein_coding	chr6	113334124	113343984	-	753	126	1380	-3.44281
ENSMUSG00000000881	Dlg3	protein_coding	chrX	100767722	100818408	+	111.5	18	205	-3.43857
ENSMUSG00000031387	Renbp	protein_coding	chrX	73922121	73930850	-	253	42	464	-3.43482
ENSMUSG00000104651	Gm21168	processed_pseudogene	chr5	25956626	25957721	+	52	8	96	-3.42999
ENSMUSG00000021835	Bmp4	protein_coding	chr14	46383520	46390669	-	12129.5	2059	22200	-3.42991
ENSMUSG00000019124	Scrn1	protein_coding	chr6	54505890	54566489	-	22.5	3	42	-3.42626
ENSMUSG00000073599	Ecscr	protein_coding	chr18	35713086	35722356	-	11412	1946	20878	-3.42273
ENSMUSG00000032598	Nckipsd	protein_coding	chr9	108808368	108818844	+	239	40	438	-3.42053
ENSMUSG00000032527	Pccb	protein_coding	chr9	100982032	101034898	-	502	85	919	-3.41923
ENSMUSG00000026683	Nuf2	protein_coding	chr1	169497934	169531464	-	841	143	1539	-3.41879
ENSMUSG00000028414	Fktn	protein_coding	chr4	53713998	53765785	+	466.5	79	854	-3.41785
ENSMUSG00000027423	Snx5	protein_coding	chr2	144250123	144270906	-	4031.5	690	7373	-3.41569
ENSMUSG00000114522	CT025552.1	lincRNA	chr13	78483354	78562570	+	16.5	2	31	-3.41504
ENSMUSG00000005447	Pafah1b3	protein_coding	chr7	25295049	25297986	-	63	10	116	-3.41093
ENSMUSG00000008575	Nfib	protein_coding	chr4	82290173	82505770	-	8965.5	1545	16386	-3.40594
ENSMUSG00000025757	Hspa4l	protein_coding	chr3	40745430	40796103	+	12269.5	2118	22421	-3.40346
ENSMUSG00000034121	Mks1	protein_coding	chr11	87853215	87863803	+	39.5	6	73	-3.4021
ENSMUSG00000044043	Pcdhb14	protein_coding	chr18	37447656	37456350	+	224	38	410	-3.39759
ENSMUSG00000022033	Pbk	protein_coding	chr14	65805837	65817822	+	189	32	346	-3.3944
ENSMUSG00000092368	A930015D03Rik	antisense_RNA	chr17	35994453	36038435	+	22	3	41	-3.39232
ENSMUSG00000009551	6330409D20Rik	protein_coding	chr2	32732620	32741016	-	22	3	41	-3.39232
ENSMUSG00000012117	Dhdds	protein_coding	chr4	133969028	134000890	-	319.5	55	584	-3.38494
ENSMUSG00000017309	Cd300lg	protein_coding	chr11	102041509	102055620	+	422.5	73	772	-3.38487
ENSMUSG00000029070	Mxra8	protein_coding	chr4	155839726	155844088	+	1091.5	190	1993	-3.38402
ENSMUSG00000020689	Itgb3	protein_coding	chr11	104608000	104670476	+	8603.5	1507	15700	-3.38015
ENSMUSG00000022754	Tmem45a	protein_coding	chr16	56805161	56886166	-	101.5	17	186	-3.37697
ENSMUSG00000036223	Ska1	protein_coding	chr18	74195299	74207818	-	95.5	16	175	-3.37197
ENSMUSG00000049804	Armcx4	protein_coding	chrX	134686519	134696757	+	973.5	171	1776	-3.36896
ENSMUSG00000032103	Pus3	protein_coding	chr9	35559460	35567401	+	350	61	639	-3.36773
ENSMUSG00000027395	Polr1b	protein_coding	chr2	129100995	129126594	+	457.5	80	835	-3.36751
ENSMUSG00000083307	AA414768	processed_pseudogene	chrX	12936872	12938128	+	89.5	15	164	-3.36632
ENSMUSG00000095253	Zfp799	protein_coding	chr17	32815449	32830261	-	275.5	48	503	-3.36257
ENSMUSG00000019478	Rab4a	protein_coding	chr8	123805985	123835287	+	150.5	26	275	-3.35364
ENSMUSG00000101939	Gm28438	unprocessed_pseudogene	chr1	24612775	24613119	-	32.5	5	60	-3.34577
ENSMUSG00000024505	Dtwd2	protein_coding	chr18	49696145	49755601	-	71.5	12	131	-3.34395
ENSMUSG00000062127	Cttnbp2nl	protein_coding	chr3	105001915	105053146	-	9925	1793	18057	-3.33139
ENSMUSG00000006476	Nsmf	protein_coding	chr2	25054355	25062881	+	589	106	1072	-3.32597
ENSMUSG00000047414	Flrt2	protein_coding	chr12	95692226	95785215	+	26921	4888	48954	-3.32384
ENSMUSG00000031428	Zcchc18	protein_coding	chrX	136993155	136998472	+	26.5	4	49	-3.32193
ENSMUSG00000046080	Clec9a	protein_coding	chr6	129408862	129424763	+	21	3	39	-3.32193
ENSMUSG00000085573	Gm15418	antisense_RNA	chr8	11187755	11204503	+	15.5	2	29	-3.32193
ENSMUSG00000114136	CT010452.1	antisense_RNA	chr12	12351522	12392615	-	10	1	19	-3.32193
ENSMUSG00000026198	Abcb6	protein_coding	chr1	75171717	75180392	-	10	1	19	-3.32193
ENSMUSG00000114196	AC154597.1	antisense_RNA	chr14	41053653	41061614	+	4.5	0	9	-3.32193
ENSMUSG00000113506	AC166358.6	transcribed_unprocessed_pseudogene	chr12	22584129	22587635	-	4.5	0	9	-3.32193
ENSMUSG00000112605	CR974589.1	processed_pseudogene	chr12	49776115	49776775	-	4.5	0	9	-3.32193
ENSMUSG00000110251	Gm2996	processed_pseudogene	chr7	102647630	102648166	-	4.5	0	9	-3.32193
ENSMUSG00000103038	Gm37124	TEC	chr1	137924388	137926379	+	4.5	0	9	-3.32193
ENSMUSG00000102960	Gm37943	TEC	chr1	156872177	156876120	-	4.5	0	9	-3.32193
ENSMUSG00000102114	BC048559	antisense_RNA	chr10	41746721	41783437	+	4.5	0	9	-3.32193
ENSMUSG00000097374	Gm26874	lincRNA	chr19	57459572	57461553	-	4.5	0	9	-3.32193
ENSMUSG00000093511	Gm20680	antisense_RNA	chr15	100586096	100592037	+	4.5	0	9	-3.32193
ENSMUSG00000088712	Gm22728	scaRNA	chr5	92056064	92056192	-	4.5	0	9	-3.32193
ENSMUSG00000088170	Gm25219	misc_RNA	chr5	23487394	23487723	-	4.5	0	9	-3.32193
ENSMUSG00000087557	Gm15869	sense_intronic	chr16	14316074	14317285	-	4.5	0	9	-3.32193
ENSMUSG00000085755	Gm13496	antisense_RNA	chr2	38996713	38998258	-	4.5	0	9	-3.32193
ENSMUSG00000078905	Gm14393	protein_coding	chr2	175061549	175067781	-	4.5	0	9	-3.32193
ENSMUSG00000065086	Gm26495	snoRNA	chr10	116340583	116340719	+	4.5	0	9	-3.32193
ENSMUSG00000059775	Rps26-ps1	transcribed_processed_pseudogene	chr8	107439131	107439579	-	4.5	0	9	-3.32193
ENSMUSG00000042340	Ctf1	protein_coding	chr7	127712736	127718192	+	4.5	0	9	-3.32193
ENSMUSG00000033470	Cysltr2	protein_coding	chr14	73029128	73049114	-	4.5	0	9	-3.32193
ENSMUSG00000030757	Zkscan2	protein_coding	chr7	123475384	123500449	-	4.5	0	9	-3.32193
ENSMUSG00000027919	Lce1g	protein_coding	chr3	92750148	92752338	-	4.5	0	9	-3.32193
ENSMUSG00000078779	Zfp59	protein_coding	chr7	27838607	27856438	+	81	14	148	-3.31228
ENSMUSG00000040820	Hlcs	protein_coding	chr16	94129195	94313563	-	496	90	902	-3.31079
ENSMUSG00000033701	Acbd6	protein_coding	chr1	155558120	155691330	+	298	54	542	-3.30345
ENSMUSG00000074793	Hspa12b	protein_coding	chr2	131127280	131146321	+	866	159	1573	-3.29829
ENSMUSG00000034245	Hdac11	protein_coding	chr6	91156665	91174692	+	31.5	5	58	-3.29768
ENSMUSG00000041774	Ydjc	protein_coding	chr16	17144621	17160701	+	226	41	411	-3.29418
ENSMUSG00000050538	B230217C12Rik	protein_coding	chr11	97840780	97844099	+	80	14	146	-3.29278
ENSMUSG00000043079	Synpo	protein_coding	chr18	60593973	60648319	-	4615	855	8375	-3.29058
ENSMUSG00000028261	Ndufaf4	protein_coding	chr4	24898083	24905001	+	1376.5	255	2498	-3.28714
ENSMUSG00000037872	Ackr1	protein_coding	chr1	173331890	173333673	-	20.5	3	38	-3.2854
ENSMUSG00000033111	3830406C13Rik	protein_coding	chr14	12284173	12303231	+	622	115	1129	-3.28413
ENSMUSG00000097026	Gm26786	lincRNA	chr8	106237903	106425728	-	36.5	6	67	-3.28011
ENSMUSG00000041842	Fhdc1	protein_coding	chr3	84442198	84480429	-	951.5	177	1726	-3.27832
ENSMUSG00000045362	Tnfrsf26	protein_coding	chr7	143607659	143628722	-	1630	304	2956	-3.27725
ENSMUSG00000036186	Fam69b	protein_coding	chr2	26628457	26636497	+	31	5	57	-3.27302
ENSMUSG00000086769	Gm15587	antisense_RNA	chr5	24366192	24383614	-	15	2	28	-3.27302
ENSMUSG00000026356	Dars	protein_coding	chr1	128363707	128417368	-	2673.5	501	4846	-3.27133
ENSMUSG00000015971	Actr8	protein_coding	chr14	29978337	30006354	+	334.5	62	607	-3.27065
ENSMUSG00000047033	Pcdhb15	protein_coding	chr18	37473540	37476340	+	68	12	124	-3.26534
ENSMUSG00000020886	Dlg4	protein_coding	chr11	70017085	70045532	+	609	114	1104	-3.26434
ENSMUSG00000064267	Hvcn1	protein_coding	chr5	122209729	122242297	+	25.5	4	47	-3.26303
ENSMUSG00000034285	Nipsnap1	protein_coding	chr11	4873951	4894200	+	210.5	39	382	-3.25927
ENSMUSG00000038301	Snx10	protein_coding	chr6	51523901	51590679	+	580	109	1051	-3.25756
ENSMUSG00000018446	C1qbp	protein_coding	chr11	70977836	70983026	-	1533.5	290	2777	-3.25496
ENSMUSG00000026657	Frmd4a	protein_coding	chr2	4017744	4614043	+	6741	1278	12204	-3.25438
ENSMUSG00000031517	Gpm6a	protein_coding	chr8	54954843	55060871	+	510	96	924	-3.2534
ENSMUSG00000047037	Nipa1	protein_coding	chr7	55977567	56019954	-	747	141	1353	-3.25326
ENSMUSG00000034023	Fancd2	protein_coding	chr6	113531682	113597017	+	178	33	323	-3.25239
ENSMUSG00000024535	Snx24	protein_coding	chr18	53245662	53390823	+	545.5	103	988	-3.24939
ENSMUSG00000025001	Hells	protein_coding	chr19	38930915	38971051	+	1553.5	295	2812	-3.24844
ENSMUSG00000107749	Gm44321	TEC	chr6	71276494	71279348	+	30.5	5	56	-3.24793
ENSMUSG00000080115	Eef1akmt3	protein_coding	chr10	127031004	127041513	-	20	3	37	-3.24793
ENSMUSG00000028111	Ctsk	protein_coding	chr3	95499256	95509362	+	20	3	37	-3.24793
ENSMUSG00000103738	Gm37652	TEC	chr3	30501719	30503813	-	9.5	1	18	-3.24793
ENSMUSG00000085174	Gm16206	antisense_RNA	chr3	53452619	53457797	+	9.5	1	18	-3.24793
ENSMUSG00000054258	Gm5082	lincRNA	chr13	41649443	41656700	+	9.5	1	18	-3.24793
ENSMUSG00000035849	Krt222	protein_coding	chr11	99232761	99244085	-	9.5	1	18	-3.24793
ENSMUSG00000026058	Khdrbs2	protein_coding	chr1	32172714	32658568	+	140	26	254	-3.23947
ENSMUSG00000028089	Chd1l	protein_coding	chr3	97560742	97610203	-	213	40	386	-3.23864
ENSMUSG00000030271	Ogg1	protein_coding	chr6	113326972	113334188	+	82.5	15	150	-3.2384
ENSMUSG00000093916	Gm379	protein_coding	chrX	108664004	108664891	-	51	9	93	-3.23266
ENSMUSG00000039748	Exo1	protein_coding	chr1	175880581	175913489	+	243	46	440	-3.23005
ENSMUSG00000024998	Plce1	protein_coding	chr19	38481121	38785030	+	481.5	92	871	-3.22903
ENSMUSG00000021929	Kpna3	protein_coding	chr14	61365211	61439874	-	3302	636	5968	-3.22812
ENSMUSG00000004929	Thop1	protein_coding	chr10	81070035	81082559	+	553	106	1000	-3.22576
ENSMUSG00000023092	Fhl1	protein_coding	chrX	56731787	56793346	+	760	146	1374	-3.22554
ENSMUSG00000107476	Zfp862-ps	transcribed_unitary_pseudogene	chr6	48504337	48534832	+	87	16	158	-3.22542
ENSMUSG00000040181	Fmo1	protein_coding	chr1	162829561	162866610	-	30	5	55	-3.22239
ENSMUSG00000057058	Skap1	protein_coding	chr11	96464593	96759130	+	14.5	2	27	-3.22239
ENSMUSG00000090659	Zfp493	protein_coding	chr13	67779705	67792512	+	55.5	10	101	-3.21299
ENSMUSG00000104851	E030026E10Rik	TEC	chr5	44736337	44738553	-	19.5	3	36	-3.20945
ENSMUSG00000025203	Scd2	protein_coding	chr19	44293676	44306864	+	5194	1013	9375	-3.20891
ENSMUSG00000022489	Pde1b	protein_coding	chr15	103503298	103530052	+	111.5	21	202	-3.2059
ENSMUSG00000022661	Cd200	protein_coding	chr16	45382135	45409053	-	801	156	1446	-3.20423
ENSMUSG00000078862	Gm14326	protein_coding	chr2	177935993	177957297	-	75.5	14	137	-3.20163
ENSMUSG00000109998	Gm45437	antisense_RNA	chr7	45630664	45633077	-	24.5	4	45	-3.20163
ENSMUSG00000106121	Gm42679	sense_intronic	chr3	102491342	102494247	+	24.5	4	45	-3.20163
ENSMUSG00000024493	Lars	protein_coding	chr18	42202350	42262122	-	2682.5	527	4838	-3.1961
ENSMUSG00000074212	Dnajb14	protein_coding	chr3	137867675	137916557	+	1596	314	2878	-3.19214
ENSMUSG00000004110	Cacna1e	protein_coding	chr1	154390731	154864067	-	475.5	93	858	-3.19193
ENSMUSG00000035152	Ap2b1	protein_coding	chr11	83302483	83405035	+	4655	918	8392	-3.19105
ENSMUSG00000045007	Tubg2	protein_coding	chr11	101155907	101161787	+	80	15	145	-3.18982
ENSMUSG00000022346	Myc	protein_coding	chr15	61985391	61990374	+	524.5	103	946	-3.18678
ENSMUSG00000008398	Elk3	protein_coding	chr10	93247414	93311135	-	5885.5	1165	10606	-3.18538
ENSMUSG00000032657	Fam189b	protein_coding	chr3	89183203	89189295	+	104.5	20	189	-3.17754
ENSMUSG00000003541	Ier3	protein_coding	chr17	35821684	35822923	+	660	131	1189	-3.17235
ENSMUSG00000112756	AC125487.2	TEC	chr12	95724956	95726255	+	39	7	71	-3.16993
ENSMUSG00000053291	Rab4b	protein_coding	chr7	27168424	27178896	-	34	6	62	-3.16993
ENSMUSG00000112067	AC125487.1	TEC	chr12	95734110	95735409	+	24	4	44	-3.16993
ENSMUSG00000001943	Vsig2	protein_coding	chr9	37539255	37544205	+	24	4	44	-3.16993
ENSMUSG00000049916	2610318N02Rik	protein_coding	chr16	17113399	17125140	-	19	3	35	-3.16993
ENSMUSG00000093009	Snord52	snoRNA	chr17	34950952	34951017	-	9	1	17	-3.16993
ENSMUSG00000083646	Gm6088	processed_pseudogene	chrX	140797396	140799934	+	9	1	17	-3.16993
ENSMUSG00000051537	Gm5124	transcribed_processed_pseudogene	chrX	21360865	21364622	+	9	1	17	-3.16993
ENSMUSG00000113288	AC164164.1	TEC	chr12	66456103	66458442	-	4	0	8	-3.16993
ENSMUSG00000113128	AC139323.1	TEC	chr13	3899209	3900248	-	4	0	8	-3.16993
ENSMUSG00000113019	CT009718.2	lincRNA	chr13	74509598	74522461	-	4	0	8	-3.16993
ENSMUSG00000111250	AC159886.2	lincRNA	chr9	77836030	77848111	+	4	0	8	-3.16993
ENSMUSG00000110895	AC123832.1	TEC	chr9	75582739	75585109	-	4	0	8	-3.16993
ENSMUSG00000110458	Gm21769	processed_pseudogene	chr8	20122384	20122494	+	4	0	8	-3.16993
ENSMUSG00000108207	1810059H22Rik	processed_transcript	chr5	148953748	148970122	-	4	0	8	-3.16993
ENSMUSG00000107932	Gm44432	TEC	chr6	4610234	4611171	+	4	0	8	-3.16993
ENSMUSG00000107102	Gm42726	antisense_RNA	chr5	65587716	65591440	-	4	0	8	-3.16993
ENSMUSG00000107009	6720475M21Rik	TEC	chr5	74367163	74369915	-	4	0	8	-3.16993
ENSMUSG00000104886	Gm43000	antisense_RNA	chr5	15993957	15997839	-	4	0	8	-3.16993
ENSMUSG00000104512	Gm37165	antisense_RNA	chr18	37714279	37726121	-	4	0	8	-3.16993
ENSMUSG00000103539	Gm37834	TEC	chr3	31954764	31957798	+	4	0	8	-3.16993
ENSMUSG00000103075	Gm38109	TEC	chr17	88533027	88533207	+	4	0	8	-3.16993
ENSMUSG00000102615	Gm37844	TEC	chr8	15024326	15028422	-	4	0	8	-3.16993
ENSMUSG00000100658	F730311O21Rik	lincRNA	chr1	132342023	132349626	+	4	0	8	-3.16993
ENSMUSG00000100281	4930422M22Rik	antisense_RNA	chr9	99299007	99304675	-	4	0	8	-3.16993
ENSMUSG00000100147	1700047M11Rik	lincRNA	chr1	182287990	182303325	+	4	0	8	-3.16993
ENSMUSG00000099045	Mir6374	miRNA	chr6	83400996	83401102	-	4	0	8	-3.16993
ENSMUSG00000098942	Mir8100	miRNA	chr11	46102270	46102390	+	4	0	8	-3.16993
ENSMUSG00000098813	Gm27326	snoRNA	chr11	97780182	97780276	-	4	0	8	-3.16993
ENSMUSG00000092412	Gm20507	processed_transcript	chr17	33630759	33645705	+	4	0	8	-3.16993
ENSMUSG00000092335	Zfp977	protein_coding	chr7	42579783	42592547	-	4	0	8	-3.16993
ENSMUSG00000090334	Gm17149	processed_pseudogene	chr8	18656615	18656989	-	4	0	8	-3.16993
ENSMUSG00000084753	Gm22452	snRNA	chr13	23663021	23663124	+	4	0	8	-3.16993
ENSMUSG00000084381	AA413626	processed_pseudogene	chr11	4918510	4919003	+	4	0	8	-3.16993
ENSMUSG00000083139	Gm12418	processed_pseudogene	chr4	84915896	84916837	+	4	0	8	-3.16993
ENSMUSG00000081829	Gm15460	processed_pseudogene	chr3	137905009	137905399	+	4	0	8	-3.16993
ENSMUSG00000081404	Gm15694	processed_pseudogene	chr16	31987178	31987460	-	4	0	8	-3.16993
ENSMUSG00000080907	4930455H04Rik	protein_coding	chr3	116968267	116984406	+	4	0	8	-3.16993
ENSMUSG00000077212	Snord69	snoRNA	chr14	31014287	31014366	-	4	0	8	-3.16993
ENSMUSG00000044544	4921513I03Rik	lincRNA	chr10	120765774	120778886	+	4	0	8	-3.16993
ENSMUSG00000043461	Sptssb	protein_coding	chr3	69819542	69859940	-	4	0	8	-3.16993
ENSMUSG00000038670	Mybpc2	protein_coding	chr7	44501699	44524656	-	4	0	8	-3.16993
ENSMUSG00000031576	Kcnu1	protein_coding	chr8	25849623	25937939	+	4	0	8	-3.16993
ENSMUSG00000030154	Klrb1f	protein_coding	chr6	129045901	129057464	+	4	0	8	-3.16993
ENSMUSG00000029410	Ppef2	protein_coding	chr5	92226679	92256278	-	4	0	8	-3.16993
ENSMUSG00000024502	Jakmip2	protein_coding	chr18	43531408	43687773	-	4	0	8	-3.16993
ENSMUSG00000028690	Mmachc	protein_coding	chr4	116702279	116708406	-	228.5	45	412	-3.16644
ENSMUSG00000031129	Slc9a9	protein_coding	chr9	94669909	95230445	+	258	51	465	-3.16375
ENSMUSG00000022462	Slc38a2	protein_coding	chr15	96687394	96699698	-	21423.5	4305	38542	-3.16205
ENSMUSG00000053333	Dis3l2	protein_coding	chr1	86703819	87050095	+	302.5	60	545	-3.16202
ENSMUSG00000043313	Pcdhb19	protein_coding	chr18	37496991	37504128	+	163	32	294	-3.16018
ENSMUSG00000046546	Fam43a	protein_coding	chr16	30599723	30602797	+	6493.5	1308	11679	-3.1575
ENSMUSG00000005718	Tfap4	protein_coding	chr16	4544661	4559720	-	58.5	11	106	-3.1565
ENSMUSG00000024168	Tmem204	protein_coding	chr17	25057702	25081181	-	1470.5	296	2645	-3.15528
ENSMUSG00000027018	Hat1	protein_coding	chr2	71388958	71441622	+	571	115	1027	-3.14764
ENSMUSG00000040785	Ttc3	protein_coding	chr16	94370618	94469222	+	6186	1254	11118	-3.14727
ENSMUSG00000051319	1500011K16Rik	protein_coding	chr2	127791388	127792488	-	68	13	123	-3.14684
ENSMUSG00000032899	Styk1	protein_coding	chr6	131299142	131316398	-	33.5	6	61	-3.14684
ENSMUSG00000071654	Uqcc3	protein_coding	chr19	8880016	8880933	-	97.5	19	176	-3.14568
ENSMUSG00000009739	Pou6f1	protein_coding	chr15	100575318	100599984	-	171	34	308	-3.14218
ENSMUSG00000078789	Dph1	protein_coding	chr11	75177643	75190519	-	53	10	96	-3.14048
ENSMUSG00000097442	Gm26632	antisense_RNA	chr8	33813203	33833094	+	23.5	4	43	-3.1375
ENSMUSG00000032788	Pdxk	protein_coding	chr10	78436744	78464975	-	165.5	33	298	-3.13654
ENSMUSG00000028040	Efna4	protein_coding	chr3	89333390	89338028	-	87	17	157	-3.13386
ENSMUSG00000029471	Camkk2	protein_coding	chr5	122731170	122779382	-	364.5	74	655	-3.12873
ENSMUSG00000030283	St8sia1	protein_coding	chr6	142821545	142964452	-	418	85	751	-3.12832
ENSMUSG00000025969	Nrp2	protein_coding	chr1	62703285	62818695	+	20476.5	4211	36742	-3.12489
ENSMUSG00000105637	Gm42480	TEC	chr5	57793159	57795753	+	13.5	2	25	-3.11548
ENSMUSG00000093277	Gm26236	snoRNA	chr2	32675109	32675245	+	13.5	2	25	-3.11548
ENSMUSG00000086491	Gm13291	lincRNA	chr2	11385003	11387064	+	13.5	2	25	-3.11548
ENSMUSG00000027716	Trpc3	protein_coding	chr3	36620482	36690167	-	748	154	1342	-3.11512
ENSMUSG00000089715	Cbx6	protein_coding	chr15	79823896	79834688	-	2577.5	534	4621	-3.11091
ENSMUSG00000047473	Zfp30	protein_coding	chr7	29783998	29794702	+	100	20	180	-3.10753
ENSMUSG00000056671	Prelid2	protein_coding	chr18	41875696	41951194	-	23	4	42	-3.10434
ENSMUSG00000028057	Rit1	protein_coding	chr3	88716838	88729727	+	588.5	122	1055	-3.10188
ENSMUSG00000049288	Lix1l	protein_coding	chr3	96601149	96626171	+	758	158	1358	-3.09545
ENSMUSG00000070283	Ndufaf3	protein_coding	chr9	108565537	108567434	-	80	16	144	-3.09245
ENSMUSG00000042613	Pbxip1	protein_coding	chr3	89436706	89450952	+	1642	344	2940	-3.09164
ENSMUSG00000079057	Cyp4v3	protein_coding	chr8	45304944	45333216	-	441	92	790	-3.08838
ENSMUSG00000040204	Pclaf	protein_coding	chr9	65890237	65903266	+	493	103	883	-3.08746
ENSMUSG00000002329	Mdp1	protein_coding	chr14	55657879	55660508	-	312.5	65	560	-3.08746
ENSMUSG00000044231	Nhlrc1	protein_coding	chr13	47012557	47014850	-	37	7	67	-3.08746
ENSMUSG00000087519	AV039307	processed_transcript	chr2	120850717	120866689	+	18	3	33	-3.08746
ENSMUSG00000079993	Gm11799	processed_pseudogene	chr4	8166894	8167353	-	18	3	33	-3.08746
ENSMUSG00000108648	Gm44674	antisense_RNA	chr7	128728394	128729522	+	8.5	1	16	-3.08746
ENSMUSG00000064634	Gm22620	snoRNA	chr9	15315189	15315321	+	8.5	1	16	-3.08746
ENSMUSG00000051113	Fam71e1	protein_coding	chr7	44496581	44501140	+	8.5	1	16	-3.08746
ENSMUSG00000042190	Cmklr1	protein_coding	chr5	113612354	113650426	-	8.5	1	16	-3.08746
ENSMUSG00000029321	Slc10a6	protein_coding	chr5	103605711	103629403	-	8.5	1	16	-3.08746
ENSMUSG00000002279	Lmf1	protein_coding	chr17	25579174	25662826	+	79.5	16	143	-3.08246
ENSMUSG00000047710	Champ1	protein_coding	chr8	13869641	13881639	+	633.5	133	1134	-3.08239
ENSMUSG00000037010	Apln	protein_coding	chrX	48025146	48034853	-	10608.5	2243	18974	-3.07996
ENSMUSG00000024446	Rpp21	protein_coding	chr17	36255667	36258069	-	51	10	92	-3.07973
ENSMUSG00000097709	2810429I04Rik	lincRNA	chr13	3478243	3501393	+	84	17	151	-3.078
ENSMUSG00000112082	AC101882.1	lincRNA	chr10	99452654	99460230	-	32	6	58	-3.07529
ENSMUSG00000035235	Trim13	protein_coding	chr14	61598247	61605946	+	267.5	56	479	-3.074
ENSMUSG00000082319	Gm8822	processed_pseudogene	chrX	81820384	81822730	-	60	12	108	-3.06774
ENSMUSG00000039901	9130011E15Rik	protein_coding	chr19	45818144	45998488	-	406.5	86	727	-3.06485
ENSMUSG00000006576	Slc4a3	protein_coding	chr1	75546266	75562172	+	41	8	74	-3.05889
ENSMUSG00000105282	Gm42981	TEC	chr5	44492170	44495421	-	13	2	24	-3.05889
ENSMUSG00000079261	Gm15217	protein_coding	chr14	46379467	46383608	+	13	2	24	-3.05889
ENSMUSG00000069890	1700024J04Rik	pseudogene	chr11	49586641	49588462	-	13	2	24	-3.05889
ENSMUSG00000025899	Alkbh8	protein_coding	chr9	3335140	3391154	+	1145.5	245	2046	-3.05678
ENSMUSG00000041378	Cldn5	protein_coding	chr16	18776847	18778260	+	1919	411	3427	-3.05665
ENSMUSG00000031166	Wdr13	protein_coding	chrX	8123301	8132820	-	701.5	150	1253	-3.05392
ENSMUSG00000029559	2210016L21Rik	protein_coding	chr5	114942158	114949783	+	217.5	46	389	-3.05274
ENSMUSG00000074361	C5ar2	protein_coding	chr7	16234585	16244154	-	31.5	6	57	-3.05063
ENSMUSG00000037411	Serpine1	protein_coding	chr5	137061504	137072259	-	30812	6638	54986	-3.05005
ENSMUSG00000073792	Alg6	protein_coding	chr4	99715665	99763460	+	263.5	56	471	-3.04975
ENSMUSG00000036820	Amdhd2	protein_coding	chr17	24155833	24163766	-	249.5	53	446	-3.04924
ENSMUSG00000026784	Pdss1	protein_coding	chr2	22895522	22940266	+	226	48	404	-3.04707
ENSMUSG00000044148	1810030O07Rik	protein_coding	chrX	12654879	12673668	-	632.5	136	1129	-3.04407
ENSMUSG00000060121	Gemin2	protein_coding	chr12	59013393	59028470	+	109.5	23	196	-3.03709
ENSMUSG00000031079	Zfp300	protein_coding	chrX	21079174	21089229	-	22	4	40	-3.03562
ENSMUSG00000009585	Apobec3	protein_coding	chr15	79892403	79908436	+	1774	385	3163	-3.03508
ENSMUSG00000059588	Calcrl	protein_coding	chr2	84330626	84425411	-	7471	1626	13316	-3.03298
ENSMUSG00000083902	Gm15975	processed_pseudogene	chr5	55624190	55625591	+	26.5	5	48	-3.02975
ENSMUSG00000052934	Fbxo31	protein_coding	chr8	121549440	121578806	-	181.5	39	324	-3.02237
ENSMUSG00000018909	Arrb1	protein_coding	chr7	99535466	99606771	+	9040.5	1984	16097	-3.01967
ENSMUSG00000029757	Dync1i1	protein_coding	chr6	5725639	6028039	+	44.5	9	80	-3.01792
ENSMUSG00000071632	2510002D24Rik	protein_coding	chr16	18836578	18840160	+	504	110	898	-3.01776
ENSMUSG00000032782	Cntrob	protein_coding	chr11	69299487	69323775	-	117	25	209	-3.01381
ENSMUSG00000036403	Cep135	protein_coding	chr5	76588701	76646466	+	756.5	166	1347	-3.0129
ENSMUSG00000060950	Trmt61a	protein_coding	chr12	111678105	111683902	+	166.5	36	297	-3.00972
ENSMUSG00000017176	Nt5c3b	protein_coding	chr11	100422321	100441808	-	826.5	182	1471	-3.00786
ENSMUSG00000026786	Apbb1ip	protein_coding	chr2	22774094	22875653	+	391.5	86	697	-3.00414
ENSMUSG00000008734	Gprc5b	protein_coding	chr7	118972047	118995211	-	1209.5	268	2151	-3
ENSMUSG00000048347	Pcdhb18	protein_coding	chr18	37489465	37494505	+	224	49	399	-3
ENSMUSG00000034071	Zfp551	protein_coding	chr7	12415153	12422751	-	62	13	111	-3
ENSMUSG00000106749	Gm43281	TEC	chr5	66916008	66918711	+	12.5	2	23	-3
ENSMUSG00000009941	Nxf2	protein_coding	chrX	134944528	134964754	-	12.5	2	23	-3
ENSMUSG00000112655	AC160138.2	TEC	chr12	3368429	3369959	+	8	1	15	-3
ENSMUSG00000100025	Gm8141	processed_pseudogene	chr1	109833024	109834746	+	8	1	15	-3
ENSMUSG00000097170	Gm16982	antisense_RNA	chr7	141610066	141613747	-	8	1	15	-3
ENSMUSG00000039375	Wdr17	protein_coding	chr8	54629055	54724504	-	8	1	15	-3
ENSMUSG00000030553	Pgpep1l	protein_coding	chr7	68236610	68264233	-	8	1	15	-3
ENSMUSG00000114714	AC140397.2	TEC	chr13	36458447	36459280	-	3.5	0	7	-3
ENSMUSG00000114649	CT025642.3	lincRNA	chr13	78171630	78182973	+	3.5	0	7	-3
ENSMUSG00000114498	AC126275.1	processed_pseudogene	chr14	20057852	20058297	-	3.5	0	7	-3
ENSMUSG00000112926	CT571252.1	processed_pseudogene	chr12	51133551	51134702	-	3.5	0	7	-3
ENSMUSG00000111132	AC154296.2	unprocessed_pseudogene	chr9	15320733	15321277	+	3.5	0	7	-3
ENSMUSG00000107624	Gm44005	TEC	chr6	88738192	88741364	+	3.5	0	7	-3
ENSMUSG00000106439	Gm44327	miRNA	chr3	136798262	136798378	-	3.5	0	7	-3
ENSMUSG00000106106	CT010467.1	rRNA	chr17	39848103	39848827	-	3.5	0	7	-3
ENSMUSG00000103546	Gm37666	TEC	chr2	69013612	69014477	+	3.5	0	7	-3
ENSMUSG00000102154	Gm37469	antisense_RNA	chr1	165848155	165849044	-	3.5	0	7	-3
ENSMUSG00000101724	Gm29453	sense_intronic	chr1	51847840	51849118	-	3.5	0	7	-3
ENSMUSG00000100620	Gm28277	sense_intronic	chr1	135409622	135414186	-	3.5	0	7	-3
ENSMUSG00000100615	Gm5511	processed_pseudogene	chr19	11438031	11438832	+	3.5	0	7	-3
ENSMUSG00000098068	Gm7909	processed_pseudogene	chr10	31574400	31575013	-	3.5	0	7	-3
ENSMUSG00000095407	Tmem200c	protein_coding	chr17	68837136	68843138	+	3.5	0	7	-3
ENSMUSG00000091078	Gm17218	antisense_RNA	chr17	26620358	26625100	-	3.5	0	7	-3
ENSMUSG00000089092	Gm25654	snRNA	chr13	64296437	64296524	-	3.5	0	7	-3
ENSMUSG00000086191	Zfp652os	antisense_RNA	chr11	95700106	95712754	-	3.5	0	7	-3
ENSMUSG00000083422	Gm15604	processed_pseudogene	chr1	10554098	10555553	-	3.5	0	7	-3
ENSMUSG00000082996	Gm6238	processed_pseudogene	chrX	104382042	104382506	-	3.5	0	7	-3
ENSMUSG00000081353	Gm13818	processed_pseudogene	chr2	93794570	93795080	+	3.5	0	7	-3
ENSMUSG00000080972	Gm16061	processed_pseudogene	chr5	135698163	135699019	-	3.5	0	7	-3
ENSMUSG00000069223	4930451E10Rik	antisense_RNA	chr13	55775940	55784505	-	3.5	0	7	-3
ENSMUSG00000065734	Snord49a	snoRNA	chr11	62603450	62603521	+	3.5	0	7	-3
ENSMUSG00000065687	Gm23734	snoRNA	chr1	127375131	127375239	+	3.5	0	7	-3
ENSMUSG00000065208	Gm24616	snoRNA	chr16	23111617	23111755	+	3.5	0	7	-3
ENSMUSG00000064731	Snord45b	snoRNA	chr3	153910563	153910633	-	3.5	0	7	-3
ENSMUSG00000064340	mt-Tl1	Mt_tRNA	chrM	2676	2750	+	3.5	0	7	-3
ENSMUSG00000062704	9430002A10Rik	lincRNA	chr8	88174560	88175034	+	3.5	0	7	-3
ENSMUSG00000034438	Gbp8	protein_coding	chr5	105014153	105139540	-	3.5	0	7	-3
ENSMUSG00000027338	Prnd	protein_coding	chr2	131950861	131956130	+	3.5	0	7	-3
ENSMUSG00000021499	Catsper3	protein_coding	chr13	55784568	55808998	+	3.5	0	7	-3
ENSMUSG00000010841	1700006E09Rik	protein_coding	chr11	101984279	101992264	+	3.5	0	7	-3
ENSMUSG00000018379	Srsf1	protein_coding	chr11	88047373	88053755	+	4247.5	945	7550	-2.99676
ENSMUSG00000100094	1810008I18Rik	lincRNA	chr7	65803111	65806449	+	174	38	310	-2.99537
ENSMUSG00000087380	2210408F21Rik	processed_transcript	chr6	31220351	31337404	+	120	26	214	-2.99331
ENSMUSG00000021281	Tnfaip2	protein_coding	chr12	111442469	111455018	+	4553	1018	8088	-2.98881
ENSMUSG00000062110	Scfd2	protein_coding	chr5	74204816	74531759	-	597.5	133	1062	-2.98784
ENSMUSG00000053600	Zfp472	protein_coding	chr17	32965814	32979233	+	115	25	205	-2.98606
ENSMUSG00000039246	Lyplal1	protein_coding	chr1	186087731	186117310	-	57	12	102	-2.98606
ENSMUSG00000001525	Tubb5	protein_coding	chr17	35833921	35838306	-	19201.5	4304	34099	-2.98569
ENSMUSG00000103427	Gm37534	TEC	chr1	137949422	137954643	+	48	10	86	-2.98351
ENSMUSG00000022704	Qtrt2	protein_coding	chr16	43861407	43889685	-	444	99	789	-2.98185
ENSMUSG00000027102	Hoxd8	protein_coding	chr2	74704615	74707933	+	1768	397	3139	-2.97992
ENSMUSG00000031903	Pla2g15	protein_coding	chr8	106150399	106164715	+	367.5	82	653	-2.97811
ENSMUSG00000097415	AU020206	lincRNA	chr7	75769038	75782099	-	238.5	53	424	-2.97643
ENSMUSG00000019773	Fbxo5	protein_coding	chr10	5799160	5805600	-	305	68	542	-2.97628
ENSMUSG00000026810	Dpm2	protein_coding	chr2	32570858	32573579	+	96.5	21	172	-2.9752
ENSMUSG00000086324	Gm15564	antisense_RNA	chr16	35966753	35983230	-	61	13	109	-2.974
ENSMUSG00000097715	Gpr137b-ps	transcribed_unprocessed_pseudogene	chr13	12615057	12650388	-	642	145	1139	-2.96499
ENSMUSG00000025746	Il6	protein_coding	chr5	30013114	30019981	+	21	4	38	-2.96347
ENSMUSG00000025192	Entpd7	protein_coding	chr19	43689672	43733697	+	804	182	1426	-2.96307
ENSMUSG00000029246	Ppat	protein_coding	chr5	76913276	76951578	-	1098	249	1947	-2.96199
ENSMUSG00000033107	Rnf125	protein_coding	chr18	20944625	20983848	+	741	168	1314	-2.95997
ENSMUSG00000048965	Mrgpre	protein_coding	chr7	143778363	143784500	-	227	51	403	-2.95777
ENSMUSG00000017550	Atad5	protein_coding	chr11	80089400	80135794	+	411	93	729	-2.95716
ENSMUSG00000035373	Ccl7	protein_coding	chr11	82045712	82047525	+	196	44	348	-2.95523
ENSMUSG00000092278	Gm8752	processed_pseudogene	chr17	35445856	35448926	+	16.5	3	30	-2.9542
ENSMUSG00000057378	Ryr3	protein_coding	chr2	112631355	113217087	-	16.5	3	30	-2.9542
ENSMUSG00000021087	Rtn1	protein_coding	chr12	72211752	72409054	-	16.5	3	30	-2.9542
ENSMUSG00000001029	Icam2	protein_coding	chr11	106377656	106382781	-	925.5	211	1640	-2.95244
ENSMUSG00000038205	Prkab2	protein_coding	chr3	97658212	97673812	+	182.5	41	324	-2.95198
ENSMUSG00000020160	Meis1	protein_coding	chr11	18879817	19018985	-	64.5	14	115	-2.95109
ENSMUSG00000021124	Vti1b	protein_coding	chr12	79156017	79172667	-	1575	360	2790	-2.95071
ENSMUSG00000053137	Mapk11	protein_coding	chr15	89142486	89149606	-	499.5	114	885	-2.94567
ENSMUSG00000032714	Syde1	protein_coding	chr10	78584503	78591964	-	499.5	114	885	-2.94567
ENSMUSG00000062995	Ica1	protein_coding	chr6	8630527	8778487	-	1056	242	1870	-2.94478
ENSMUSG00000041779	Tram2	protein_coding	chr1	20996299	21079229	-	846	194	1498	-2.94245
ENSMUSG00000074457	S100a16	protein_coding	chr3	90537254	90543151	+	1789	412	3166	-2.9389
ENSMUSG00000033082	Clec1a	protein_coding	chr6	129424772	129452000	-	90	20	160	-2.9386
ENSMUSG00000085929	Gm13421	processed_transcript	chr2	27540426	27543362	+	12	2	22	-2.9386
ENSMUSG00000025198	Erlin1	protein_coding	chr19	44034944	44069785	-	1385.5	319	2452	-2.9384
ENSMUSG00000046223	Plaur	protein_coding	chr7	24462484	24475967	+	8570.5	1983	15158	-2.93369
ENSMUSG00000035834	Polr3g	protein_coding	chr13	81673843	81711013	-	892	206	1578	-2.93131
ENSMUSG00000014075	Tctex1d2	protein_coding	chr16	32419702	32429099	+	33.5	7	60	-2.93074
ENSMUSG00000024534	Sncaip	protein_coding	chr18	52767709	52915935	+	167	38	296	-2.92892
ENSMUSG00000070284	Gmppb	protein_coding	chr9	108049242	108052801	+	356	82	630	-2.92646
ENSMUSG00000039206	Daglb	protein_coding	chr5	143464584	143505942	+	338.5	78	599	-2.92504
ENSMUSG00000026017	Carf	protein_coding	chr1	60105344	60153953	+	265	61	469	-2.92232
ENSMUSG00000024349	Tmem173	protein_coding	chr18	35733678	35740554	-	1834.5	427	3242	-2.92165
ENSMUSG00000074968	Ano3	protein_coding	chr2	110655201	110950923	-	1868	435	3301	-2.92094
ENSMUSG00000039601	Rcan2	protein_coding	chr17	43801851	44039516	+	766	178	1354	-2.92026
ENSMUSG00000051379	Flrt3	protein_coding	chr2	140658198	140671469	-	1013	236	1790	-2.91781
ENSMUSG00000092998	Mir5099	miRNA	chr12	36816205	36816278	+	37.5	8	67	-2.91754
ENSMUSG00000020674	Pxdn	protein_coding	chr12	29937608	30017658	+	3764	880	6648	-2.91592
ENSMUSG00000005374	Tbl2	protein_coding	chr5	135149657	135165760	+	409	95	723	-2.91488
ENSMUSG00000006932	Ctnnb1	protein_coding	chr9	120933400	120960507	+	22361.5	5238	39485	-2.91398
ENSMUSG00000053012	Krcc1	protein_coding	chr6	71271677	71285319	+	1930.5	452	3409	-2.91219
ENSMUSG00000082127	Gm13577	processed_pseudogene	chr2	64474745	64474949	-	80	18	142	-2.91194
ENSMUSG00000064337	mt-Rnr1	Mt_rRNA	chrM	70	1024	+	96071.5	22539	169604	-2.91162
ENSMUSG00000028978	Nos3	protein_coding	chr5	24364810	24384474	+	484	113	855	-2.90858
ENSMUSG00000026659	Dusp12	protein_coding	chr1	170874188	170885540	-	50	11	89	-2.90689
ENSMUSG00000109398	Gm3854	protein_coding	chr7	6343759	6355956	+	16	3	29	-2.90689
ENSMUSG00000114607	AC161252.3	processed_pseudogene	chr13	108309202	108310750	-	7.5	1	14	-2.90689
ENSMUSG00000108155	Gm44443	TEC	chr2	38025795	38031427	+	7.5	1	14	-2.90689
ENSMUSG00000085177	Gm11209	antisense_RNA	chr4	62627677	62633712	-	7.5	1	14	-2.90689
ENSMUSG00000073995	Gm10604	protein_coding	chr4	11979560	11981265	-	7.5	1	14	-2.90689
ENSMUSG00000050994	Adgb	protein_coding	chr10	10335703	10472326	-	7.5	1	14	-2.90689
ENSMUSG00000046341	Gm11223	processed_pseudogene	chr4	69925630	69926079	-	7.5	1	14	-2.90689
ENSMUSG00000003354	Ccdc65	protein_coding	chr15	98708207	98723326	+	7.5	1	14	-2.90689
ENSMUSG00000030255	Sspn	protein_coding	chr6	145931641	145965223	+	414.5	97	732	-2.90296
ENSMUSG00000026556	Vangl2	protein_coding	chr1	172000960	172028444	-	460.5	108	813	-2.9007
ENSMUSG00000027242	Wdr76	protein_coding	chr2	121506723	121544860	+	587	138	1036	-2.89926
ENSMUSG00000027001	Dusp19	protein_coding	chr2	80617045	80631661	+	83.5	19	148	-2.89724
ENSMUSG00000030782	Tgfb1i1	protein_coding	chr7	128246812	128255699	+	699	165	1233	-2.89409
ENSMUSG00000025212	Sfxn3	protein_coding	chr19	45047576	45056383	+	926.5	219	1634	-2.89372
ENSMUSG00000030002	Dusp11	protein_coding	chr6	85942268	85961667	-	2125	504	3746	-2.89138
ENSMUSG00000020604	Arsg	protein_coding	chr11	109473374	109573330	+	49.5	11	88	-2.89077
ENSMUSG00000037251	Pomk	protein_coding	chr8	25980604	25994133	-	365	86	644	-2.89021
ENSMUSG00000001774	Chordc1	protein_coding	chr9	18292125	18317442	+	2955	702	5208	-2.88941
ENSMUSG00000040327	Cul9	protein_coding	chr17	46500605	46546388	-	604	143	1065	-2.88807
ENSMUSG00000038543	BC028528	protein_coding	chr3	95883954	95892005	-	83	19	147	-2.88753
ENSMUSG00000102440	Pcdhga9	protein_coding	chr18	37736936	37841870	+	41	9	73	-2.88753
ENSMUSG00000105748	Gm43088	TEC	chr3	137897144	137899490	+	20	4	36	-2.88753
ENSMUSG00000079110	Capn3	protein_coding	chr2	120463579	120504913	+	20	4	36	-2.88753
ENSMUSG00000028541	B4galt2	protein_coding	chr4	117873131	117883487	-	318	75	561	-2.8865
ENSMUSG00000027937	Jtb	protein_coding	chr3	90231597	90235838	+	330.5	78	583	-2.88604
ENSMUSG00000032372	Plscr2	protein_coding	chr9	92275602	92297752	+	1026.5	244	1809	-2.88514
ENSMUSG00000049882	Vcpkmt	protein_coding	chr12	69577628	69583028	-	53.5	12	95	-2.88452
ENSMUSG00000053835	H2-T24	protein_coding	chr17	36005695	36020560	-	212.5	50	375	-2.88216
ENSMUSG00000014763	Fam120b	protein_coding	chr17	15396246	15433580	+	755	180	1330	-2.87845
ENSMUSG00000050370	Ch25h	protein_coding	chr19	34473786	34475135	-	628.5	150	1107	-2.87534
ENSMUSG00000082419	Gm11425	processed_pseudogene	chr11	83027500	83027997	-	24	5	43	-2.87447
ENSMUSG00000113905	AC133934.2	TEC	chr13	9557861	9561989	+	11.5	2	21	-2.87447
ENSMUSG00000105382	Gm43339	TEC	chr5	124278307	124279912	-	11.5	2	21	-2.87447
ENSMUSG00000086235	Gm16284	processed_pseudogene	chr1	8468426	8468825	-	11.5	2	21	-2.87447
ENSMUSG00000000791	Il12rb1	protein_coding	chr8	70808449	70821424	+	11.5	2	21	-2.87447
ENSMUSG00000038759	Nup205	protein_coding	chr6	35177421	35247596	+	2771	666	4876	-2.87024
ENSMUSG00000038074	Fkbp14	protein_coding	chr6	54577604	54597308	-	880	211	1549	-2.87013
ENSMUSG00000030610	Det1	protein_coding	chr7	78827472	78847263	-	223	53	393	-2.86716
ENSMUSG00000028696	Ipp	protein_coding	chr4	116507549	116538243	+	169	40	298	-2.86645
ENSMUSG00000036298	Slc2a13	protein_coding	chr15	91267696	91573261	-	666	160	1172	-2.86507
ENSMUSG00000045410	Akr1e1	protein_coding	chr13	4590750	4609174	-	529	127	931	-2.86419
ENSMUSG00000031327	Chic1	protein_coding	chrX	103356476	103396092	+	607.5	146	1069	-2.86372
ENSMUSG00000106019	Gm43672	lincRNA	chr3	22074412	22076142	-	61	14	108	-2.86129
ENSMUSG00000001227	Sema6b	protein_coding	chr17	56123085	56140343	-	776	187	1365	-2.86115
ENSMUSG00000086502	B130055M24Rik	processed_transcript	chr7	127448640	127460360	+	189	45	333	-2.86014
ENSMUSG00000036553	Sh3tc1	protein_coding	chr5	35697180	35739987	-	1205	291	2119	-2.86002
ENSMUSG00000104154	Gm38104	TEC	chr1	176751521	176753415	-	15.5	3	28	-2.85798
ENSMUSG00000087703	Gm15650	antisense_RNA	chr5	35722555	35724485	+	15.5	3	28	-2.85798
ENSMUSG00000009207	Lnpk	protein_coding	chr2	74520291	74578948	-	518	125	911	-2.85561
ENSMUSG00000037060	Cavin3	protein_coding	chr7	105480083	105482300	-	143	34	252	-2.85371
ENSMUSG00000050605	Zfp61	protein_coding	chr7	24291039	24299675	-	36	8	64	-2.85244
ENSMUSG00000073131	Vma21	protein_coding	chrX	71815924	71824706	+	714	173	1255	-2.85168
ENSMUSG00000031480	Thsd1	protein_coding	chr8	22227313	22261334	+	1658.5	403	2914	-2.85107
ENSMUSG00000040035	Disp2	protein_coding	chr2	118779719	118811293	+	905	220	1590	-2.84782
ENSMUSG00000023147	Wrb	protein_coding	chr16	96145407	96157852	+	413	100	726	-2.8476
ENSMUSG00000042015	Wdr41	protein_coding	chr13	94976344	95023314	+	494.5	120	869	-2.84601
ENSMUSG00000045092	S1pr1	protein_coding	chr3	115710433	115715072	-	22166.5	5427	38906	-2.84154
ENSMUSG00000031906	Smpd3	protein_coding	chr8	106252548	106337988	-	1473	361	2585	-2.83666
ENSMUSG00000056069	Fam105a	protein_coding	chr15	27655071	27681542	-	27.5	6	49	-2.8365
ENSMUSG00000028069	Gpatch4	protein_coding	chr3	88043108	88055993	+	601	148	1054	-2.82386
ENSMUSG00000030978	Rrm1	protein_coding	chr7	102441695	102469771	+	2459.5	609	4310	-2.82114
ENSMUSG00000022844	Pdia5	protein_coding	chr16	35397313	35490873	-	627.5	155	1100	-2.8192
ENSMUSG00000039065	Fam173b	protein_coding	chr15	31602118	31617535	+	79.5	19	140	-2.81762
ENSMUSG00000074282	Zfp94	protein_coding	chr7	24301704	24316666	-	59	14	104	-2.80735
ENSMUSG00000108802	Gm44769	TEC	chr6	71790668	71793476	+	11	2	20	-2.80735
ENSMUSG00000105422	Gm6089	processed_pseudogene	chr5	26070537	26071474	+	11	2	20	-2.80735
ENSMUSG00000085175	Gm11423	antisense_RNA	chr11	82779601	82781042	-	11	2	20	-2.80735
ENSMUSG00000108660	Gm21284	antisense_RNA	chr6	83568039	83588123	+	7	1	13	-2.80735
ENSMUSG00000079293	Clec7a	polymorphic_pseudogene	chr6	129461591	129472777	-	7	1	13	-2.80735
ENSMUSG00000076011	Mir652	miRNA	chrX	142739000	142739097	+	7	1	13	-2.80735
ENSMUSG00000065280	Gm24453	snoRNA	chr19	8724868	8724943	+	7	1	13	-2.80735
ENSMUSG00000064288	Hist1h4k	protein_coding	chr13	21750194	21750505	-	7	1	13	-2.80735
ENSMUSG00000056904	Gm5620	processed_pseudogene	chr9	91097149	91098496	+	7	1	13	-2.80735
ENSMUSG00000032908	Sgpp2	protein_coding	chr1	78310345	78420289	+	7	1	13	-2.80735
ENSMUSG00000030263	Lrmp	protein_coding	chr6	145121739	145174934	+	7	1	13	-2.80735
ENSMUSG00000113601	CT030185.3	TEC	chr13	62681192	62682501	-	3	0	6	-2.80735
ENSMUSG00000113596	AC158536.1	processed_pseudogene	chr13	100467932	100468187	+	3	0	6	-2.80735
ENSMUSG00000113159	AC126262.1	TEC	chr12	100862786	100864689	+	3	0	6	-2.80735
ENSMUSG00000113061	AL607105.1	protein_coding	chr13	28257528	28258134	+	3	0	6	-2.80735
ENSMUSG00000111808	AC159308.6	unprocessed_pseudogene	chr9	22295946	22296687	-	3	0	6	-2.80735
ENSMUSG00000110404	Rnf223	protein_coding	chr4	156130513	156133420	+	3	0	6	-2.80735
ENSMUSG00000109355	Gm4880	processed_pseudogene	chr7	18509861	18511630	-	3	0	6	-2.80735
ENSMUSG00000109086	Gm5596	processed_pseudogene	chr7	57878806	57881226	-	3	0	6	-2.80735
ENSMUSG00000108543	Gm44735	TEC	chr7	126938886	126940637	+	3	0	6	-2.80735
ENSMUSG00000108141	Gm44079	antisense_RNA	chr6	115451815	115464990	-	3	0	6	-2.80735
ENSMUSG00000106746	2900064F13Rik	TEC	chr5	81826816	81827823	+	3	0	6	-2.80735
ENSMUSG00000106547	B230303O12Rik	lincRNA	chr5	146188620	146194809	-	3	0	6	-2.80735
ENSMUSG00000105083	Gm42699	sense_intronic	chr3	104114039	104115695	-	3	0	6	-2.80735
ENSMUSG00000104968	Gm43803	antisense_RNA	chr3	53110396	53113411	-	3	0	6	-2.80735
ENSMUSG00000104905	Gm43718	TEC	chr5	13615959	13617815	-	3	0	6	-2.80735
ENSMUSG00000104824	Gm21663	protein_coding	chr5	25935791	25942381	-	3	0	6	-2.80735
ENSMUSG00000103822	6030460B20Rik	TEC	chr1	60353119	60354176	+	3	0	6	-2.80735
ENSMUSG00000102868	Gm37633	TEC	chr1	54152397	54155096	-	3	0	6	-2.80735
ENSMUSG00000102732	Gm37342	TEC	chr3	51757124	51762088	-	3	0	6	-2.80735
ENSMUSG00000102632	Gm37786	TEC	chr10	40219583	40222807	-	3	0	6	-2.80735
ENSMUSG00000101079	Gm28991	antisense_RNA	chr19	38748760	38752645	-	3	0	6	-2.80735
ENSMUSG00000098224	Gm7985	processed_pseudogene	chr12	71846311	71847291	-	3	0	6	-2.80735
ENSMUSG00000098121	Gm27038	processed_pseudogene	chr17	94756698	94756872	-	3	0	6	-2.80735
ENSMUSG00000097463	4930448E22Rik	processed_transcript	chr9	46326393	46329527	-	3	0	6	-2.80735
ENSMUSG00000097067	Gm26743	lincRNA	chr2	67677031	67687282	-	3	0	6	-2.80735
ENSMUSG00000095977	Gm23513	snoRNA	chr16	52105015	52105147	-	3	0	6	-2.80735
ENSMUSG00000093452	Zfhx2os	antisense_RNA	chr14	55073091	55075874	+	3	0	6	-2.80735
ENSMUSG00000092741	Mir3074-1	miRNA	chr13	63301199	63301283	-	3	0	6	-2.80735
ENSMUSG00000089991	Gm16332	unprocessed_pseudogene	chr1	139862957	139936477	-	3	0	6	-2.80735
ENSMUSG00000088314	Gm26186	snoRNA	chr4	121075798	121075922	-	3	0	6	-2.80735
ENSMUSG00000087629	Gm12246	antisense_RNA	chr11	58126068	58128512	+	3	0	6	-2.80735
ENSMUSG00000087593	Gm16174	antisense_RNA	chr7	19816553	19818625	+	3	0	6	-2.80735
ENSMUSG00000087413	Gm11266	antisense_RNA	chr4	82508016	82547292	+	3	0	6	-2.80735
ENSMUSG00000086454	Platr14	processed_transcript	chr2	104559163	104568056	+	3	0	6	-2.80735
ENSMUSG00000086421	Gm14091	antisense_RNA	chr2	118829874	118834122	-	3	0	6	-2.80735
ENSMUSG00000086058	Unc45bos	processed_transcript	chr11	82924903	82933382	-	3	0	6	-2.80735
ENSMUSG00000086044	A330043C09Rik	lincRNA	chr2	75147118	75177658	-	3	0	6	-2.80735
ENSMUSG00000083093	Gm15385	unprocessed_pseudogene	chrX	75459963	75485753	+	3	0	6	-2.80735
ENSMUSG00000082134	Gm15236	processed_pseudogene	chrX	165680204	165680582	+	3	0	6	-2.80735
ENSMUSG00000081631	Gm12005	processed_pseudogene	chr11	14162079	14162457	+	3	0	6	-2.80735
ENSMUSG00000081221	Gm14760	processed_pseudogene	chrX	80193854	80194852	-	3	0	6	-2.80735
ENSMUSG00000080779	Gm8731	processed_pseudogene	chr18	60778983	60779394	-	3	0	6	-2.80735
ENSMUSG00000078380	Gm6096	protein_coding	chr7	34251038	34251493	+	3	0	6	-2.80735
ENSMUSG00000077457	Snord65	snoRNA	chr11	62604515	62604586	+	3	0	6	-2.80735
ENSMUSG00000077385	Gm22657	snoRNA	chr9	65952314	65952445	-	3	0	6	-2.80735
ENSMUSG00000072419	Dppa2	protein_coding	chr16	48310477	48319723	+	3	0	6	-2.80735
ENSMUSG00000065922	n-R5-8s1	rRNA	chr18	73533403	73533550	-	3	0	6	-2.80735
ENSMUSG00000059406	Tmprss9	protein_coding	chr10	80871848	80899492	+	3	0	6	-2.80735
ENSMUSG00000055301	Adh7	protein_coding	chr3	138217760	138233382	+	3	0	6	-2.80735
ENSMUSG00000052482	Gm8174	processed_pseudogene	chr15	10560524	10561524	-	3	0	6	-2.80735
ENSMUSG00000049985	Ankrd55	protein_coding	chr13	112288451	112384002	+	3	0	6	-2.80735
ENSMUSG00000048814	Lonrf2	protein_coding	chr1	38793645	38836711	-	3	0	6	-2.80735
ENSMUSG00000035699	Slc51a	protein_coding	chr16	32475522	32487879	-	3	0	6	-2.80735
ENSMUSG00000034437	Gm9761	processed_pseudogene	chr3	116560935	116561426	-	3	0	6	-2.80735
ENSMUSG00000030159	Clec1b	protein_coding	chr6	129397297	129405333	+	3	0	6	-2.80735
ENSMUSG00000029371	Cxcl5	protein_coding	chr5	90759378	90761624	+	3	0	6	-2.80735
ENSMUSG00000027168	Pax6	protein_coding	chr2	105668900	105697364	+	3	0	6	-2.80735
ENSMUSG00000026080	Chst10	protein_coding	chr1	38863867	38898161	-	3	0	6	-2.80735
ENSMUSG00000001497	Pax9	protein_coding	chr12	56691767	56712822	+	3	0	6	-2.80735
ENSMUSG00000040836	Gpr161	protein_coding	chr1	165295789	165326745	+	234.5	58	411	-2.80386
ENSMUSG00000018999	Slc35b4	protein_coding	chr6	34153380	34177111	-	1738.5	435	3042	-2.80309
ENSMUSG00000032369	Plscr1	protein_coding	chr9	92249750	92272278	+	182.5	45	320	-2.80287
ENSMUSG00000029798	Herc6	protein_coding	chr6	57581000	57664632	+	162.5	40	285	-2.80232
ENSMUSG00000026098	Pms1	protein_coding	chr1	53189187	53297018	-	150.5	37	264	-2.80192
ENSMUSG00000044562	Rasip1	protein_coding	chr7	45627488	45639093	+	1706	428	2984	-2.79868
ENSMUSG00000026778	Prkcq	protein_coding	chr2	11172108	11301222	+	66.5	16	117	-2.79518
ENSMUSG00000021294	Kif26a	protein_coding	chr12	112146208	112181747	+	1567	395	2739	-2.7906
ENSMUSG00000039994	Timeless	protein_coding	chr10	128232065	128252941	+	335.5	84	587	-2.79028
ENSMUSG00000086701	Gm13595	antisense_RNA	chr2	65509265	65512605	+	46.5	11	82	-2.79008
ENSMUSG00000008958	Vps72	protein_coding	chr3	95111022	95123051	+	1284.5	324	2245	-2.78885
ENSMUSG00000034361	Cpne2	protein_coding	chr8	94532990	94570531	+	2322	587	4057	-2.78688
ENSMUSG00000035769	Xylb	protein_coding	chr9	119357381	119393320	+	38.5	9	68	-2.7866
ENSMUSG00000028066	Pmf1	protein_coding	chr3	88394143	88410331	-	299	75	523	-2.7855
ENSMUSG00000032125	Robo4	protein_coding	chr9	37401897	37415115	+	4025	1019	7031	-2.78537
ENSMUSG00000048581	E130311K13Rik	protein_coding	chr3	63914684	63929472	-	274.5	69	480	-2.78061
ENSMUSG00000041261	Car8	protein_coding	chr4	8143362	8239041	-	15690.5	3986	27395	-2.78059
ENSMUSG00000024556	Me2	protein_coding	chr18	73770040	73815392	-	1781.5	452	3111	-2.78026
ENSMUSG00000022369	Mtbp	protein_coding	chr15	55557408	55626423	+	298	75	521	-2.77998
ENSMUSG00000103467	Gm38245	TEC	chr1	189913339	189915959	-	26.5	6	47	-2.77761
ENSMUSG00000029414	Kntc1	protein_coding	chr5	123749726	123821593	+	468.5	119	818	-2.77083
ENSMUSG00000034771	Tle2	protein_coding	chr10	81575262	81590845	+	42	10	74	-2.76939
ENSMUSG00000031562	Dctd	protein_coding	chr8	48099092	48153233	+	866	221	1511	-2.76783
ENSMUSG00000075254	Heg1	protein_coding	chr16	33684466	33771576	+	32772.5	8391	57154	-2.76779
ENSMUSG00000020925	Ccdc43	protein_coding	chr11	102684686	102697782	-	655	167	1143	-2.76755
ENSMUSG00000082794	Gm6806	processed_pseudogene	chrX	68503126	68504131	+	18.5	4	33	-2.76553
ENSMUSG00000025731	Mettl26	protein_coding	chr17	25875500	25886007	+	53.5	13	94	-2.7625
ENSMUSG00000029507	Pus1	protein_coding	chr5	110773667	110780659	-	392	100	684	-2.76175
ENSMUSG00000044469	Tnfaip8l1	protein_coding	chr17	56162477	56173955	+	488.5	125	852	-2.75912
ENSMUSG00000031311	Nono	protein_coding	chrX	101429555	101448591	+	4950.5	1275	8626	-2.75723
ENSMUSG00000048612	Myof	protein_coding	chr19	37899036	38043577	-	20362	5249	35475	-2.75645
ENSMUSG00000025738	Fbxl16	protein_coding	chr17	25809085	25821244	+	14.5	3	26	-2.75489
ENSMUSG00000043336	Filip1l	protein_coding	chr16	57353093	57573126	+	8946	2308	15584	-2.75482
ENSMUSG00000052997	Uba2	protein_coding	chr7	34140688	34168575	-	3123	806	5440	-2.75323
ENSMUSG00000029405	G3bp2	protein_coding	chr5	92052146	92083719	-	4569	1181	7957	-2.75118
ENSMUSG00000055216	9430025C20Rik	pseudogene	chr4	3806635	3808751	-	26	6	46	-2.74723
ENSMUSG00000025815	Dhtkd1	protein_coding	chr2	5896115	5942792	-	26	6	46	-2.74723
ENSMUSG00000042489	Clspn	protein_coding	chr4	126556935	126593903	+	361.5	93	630	-2.74691
ENSMUSG00000010048	Ifrd2	protein_coding	chr9	107587642	107593038	+	184	47	321	-2.74595
ENSMUSG00000059005	Hnrnpa3	protein_coding	chr2	75659261	75669407	+	2536.5	658	4415	-2.74439
ENSMUSG00000053153	Spag16	protein_coding	chr1	69826988	70725132	+	37.5	9	66	-2.74416
ENSMUSG00000000184	Ccnd2	protein_coding	chr6	127125162	127151060	-	19693.5	5115	34272	-2.74398
ENSMUSG00000031967	Afg3l1	protein_coding	chr8	123477903	123503916	+	883.5	229	1538	-2.74229
ENSMUSG00000027630	Tbl1xr1	protein_coding	chr3	22076652	22216594	+	4604.5	1198	8011	-2.74033
ENSMUSG00000042379	Esm1	protein_coding	chr13	113209659	113218098	+	44478	11584	77372	-2.73957
ENSMUSG00000022092	Ppp3cc	protein_coding	chr14	70217898	70289449	-	106.5	27	186	-2.73954
ENSMUSG00000066026	Dhrs3	protein_coding	chr4	144892827	144928209	+	285.5	74	497	-2.73118
ENSMUSG00000022311	Csmd3	protein_coding	chr15	47580637	48792063	-	216.5	56	377	-2.72935
ENSMUSG00000038700	Hoxb5	protein_coding	chr11	96303512	96306120	+	71.5	18	125	-2.72935
ENSMUSG00000024777	Ppp2r5b	protein_coding	chr19	6227765	6235872	-	1161	304	2018	-2.72676
ENSMUSG00000044807	Zfp354c	protein_coding	chr11	50811086	50827690	-	204.5	53	356	-2.72489
ENSMUSG00000017499	Cdc6	protein_coding	chr11	98907801	98923936	+	212	55	369	-2.72403
ENSMUSG00000031927	1700012B09Rik	protein_coding	chr9	14758191	14771030	-	18	4	32	-2.72247
ENSMUSG00000026475	Rgs16	protein_coding	chr1	153740349	153745468	+	3219.5	847	5592	-2.72149
ENSMUSG00000006288	Ttc5	protein_coding	chr14	50765415	50785518	-	1036	273	1799	-2.71575
ENSMUSG00000040710	St8sia4	protein_coding	chr1	95587682	95667571	-	1966	519	3413	-2.71488
ENSMUSG00000017146	Brca1	protein_coding	chr11	101488764	101551879	-	494.5	130	859	-2.71477
ENSMUSG00000005672	Kit	protein_coding	chr5	75574916	75656722	+	952.5	252	1653	-2.70875
ENSMUSG00000031659	Adcy7	protein_coding	chr8	88272403	88329962	+	300.5	79	522	-2.70874
ENSMUSG00000026878	Rab14	protein_coding	chr2	35180205	35201120	-	5218.5	1384	9053	-2.70867
ENSMUSG00000030802	Bckdk	protein_coding	chr7	127904082	127910221	+	665.5	176	1155	-2.70732
ENSMUSG00000069565	Dazap1	protein_coding	chr10	80264984	80288408	+	885.5	235	1536	-2.70326
ENSMUSG00000022793	B4galt4	protein_coding	chr16	38742264	38769049	+	299.5	79	520	-2.70321
ENSMUSG00000068566	Myadm	protein_coding	chr7	3289080	3300442	+	4149	1104	7194	-2.70295
ENSMUSG00000033706	Smyd5	protein_coding	chr6	85431989	85446435	+	449.5	119	780	-2.70229
ENSMUSG00000020952	Scfd1	protein_coding	chr12	51377580	51450101	+	2059.5	548	3571	-2.70185
ENSMUSG00000104910	Gm43331	sense_intronic	chr3	105787633	105789321	-	14	3	25	-2.70044
ENSMUSG00000103560	Gm38070	TEC	chr1	40238020	40244499	+	14	3	25	-2.70044
ENSMUSG00000113701	AC121583.1	transcribed_processed_pseudogene	chr13	15813548	16023423	-	6.5	1	12	-2.70044
ENSMUSG00000113511	AC132336.2	processed_pseudogene	chr12	36172368	36173665	+	6.5	1	12	-2.70044
ENSMUSG00000107884	Gm44144	TEC	chr2	38852978	38854937	-	6.5	1	12	-2.70044
ENSMUSG00000106451	Gm42934	TEC	chr5	101956607	101957951	+	6.5	1	12	-2.70044
ENSMUSG00000104391	Gm37960	TEC	chr1	177035040	177036936	-	6.5	1	12	-2.70044
ENSMUSG00000103162	Gm38147	TEC	chr2	24874532	24876329	-	6.5	1	12	-2.70044
ENSMUSG00000087058	Gm12301	antisense_RNA	chr11	67571622	67577466	-	6.5	1	12	-2.70044
ENSMUSG00000085057	Gm13415	processed_transcript	chr2	24440418	24486855	+	6.5	1	12	-2.70044
ENSMUSG00000064844	Gm26202	snoRNA	chr18	75001880	75001944	+	6.5	1	12	-2.70044
ENSMUSG00000048521	Cxcr6	protein_coding	chr9	123806475	123811760	+	6.5	1	12	-2.70044
ENSMUSG00000005413	Hmox1	protein_coding	chr8	75093621	75100589	+	11794.5	3147	20442	-2.6991
ENSMUSG00000033705	Stard9	protein_coding	chr2	120629224	120716082	+	1621	432	2810	-2.69864
ENSMUSG00000069049	Eif2s3y	protein_coding	chrY	1010543	1028594	+	1523.5	406	2641	-2.69853
ENSMUSG00000037474	Dtl	protein_coding	chr1	191537365	191575544	-	414	110	718	-2.69543
ENSMUSG00000034551	Hdx	protein_coding	chrX	111569931	111697079	-	283	75	491	-2.69459
ENSMUSG00000006179	Prss16	protein_coding	chr13	22002173	22009741	-	212	56	368	-2.69459
ENSMUSG00000045294	Insig1	protein_coding	chr5	28071363	28078662	+	752	201	1303	-2.69052
ENSMUSG00000030788	Rnf141	protein_coding	chr7	110813531	110844457	-	6486.5	1740	11233	-2.68988
ENSMUSG00000024420	Zfp521	protein_coding	chr18	13687013	13972733	-	6118	1646	10590	-2.68493
ENSMUSG00000033174	Mgll	protein_coding	chr6	88724412	88828360	+	396.5	106	687	-2.6848
ENSMUSG00000002233	Rhoc	protein_coding	chr3	104788375	104794459	+	4014	1080	6948	-2.68444
ENSMUSG00000039298	Cdk5rap2	protein_coding	chr4	70216856	70410443	-	808.5	217	1400	-2.68406
ENSMUSG00000078878	Gm14305	protein_coding	chr2	176708328	176721813	+	69.5	18	121	-2.68281
ENSMUSG00000022122	Ednrb	protein_coding	chr14	103814625	103844173	-	1257.5	339	2176	-2.67873
ENSMUSG00000038463	Olfml2b	protein_coding	chr1	170644532	170682789	+	73	19	127	-2.67807
ENSMUSG00000083367	Gm8806	processed_pseudogene	chrX	80533745	80535151	-	17.5	4	31	-2.67807
ENSMUSG00000036898	Zfp157	protein_coding	chr5	138441468	138460694	+	357	96	618	-2.67388
ENSMUSG00000024588	Fech	protein_coding	chr18	64456550	64489066	-	596.5	161	1032	-2.67277
ENSMUSG00000034379	Wdr5b	protein_coding	chr16	36041190	36042973	+	98.5	26	171	-2.67138
ENSMUSG00000043505	Gimap5	protein_coding	chr6	48746197	48754210	+	879.5	238	1521	-2.67089
ENSMUSG00000029017	Pmpcb	protein_coding	chr5	21737141	21757152	+	1066	289	1843	-2.66871
ENSMUSG00000036339	Tmem260	protein_coding	chr14	48446128	48515135	+	1091.5	296	1887	-2.66832
ENSMUSG00000053799	Exoc6	protein_coding	chr19	37550418	37683245	+	3529	959	6099	-2.6677
ENSMUSG00000103567	Pcdhga5	protein_coding	chr18	37694380	37841873	+	72.5	19	126	-2.66676
ENSMUSG00000021474	Sfxn1	protein_coding	chr13	54071869	54108342	+	1541	419	2663	-2.66513
ENSMUSG00000073176	Zfp449	protein_coding	chrX	56346400	56365674	+	578.5	157	1000	-2.66345
ENSMUSG00000079065	BC005561	protein_coding	chr5	104508352	104522611	+	615	167	1063	-2.66297
ENSMUSG00000089744	Gm16146	antisense_RNA	chr18	84858636	84859547	-	10	2	18	-2.66297
ENSMUSG00000082436	Gm11688	processed_pseudogene	chr2	144261234	144261541	-	10	2	18	-2.66297
ENSMUSG00000074912	Gm14207	processed_transcript	chr2	119321187	119326194	-	10	2	18	-2.66297
ENSMUSG00000065282	Gm24455	snoRNA	chr9	15313802	15313932	+	10	2	18	-2.66297
ENSMUSG00000028637	Ccdc30	protein_coding	chr4	119323841	119415521	-	46.5	12	81	-2.65711
ENSMUSG00000003849	Nqo1	protein_coding	chr8	107388225	107403206	-	1686.5	461	2912	-2.65654
ENSMUSG00000052798	Nup107	protein_coding	chr10	117750621	117792705	-	692.5	189	1196	-2.65535
ENSMUSG00000058773	Hist1h1b	protein_coding	chr13	21779883	21780625	-	188.5	51	326	-2.65271
ENSMUSG00000068130	Zfp442	protein_coding	chr2	150407141	150451486	-	177.5	48	307	-2.65208
ENSMUSG00000068250	Amn1	protein_coding	chr6	149157147	149188712	-	126.5	34	219	-2.65208
ENSMUSG00000028683	Eif2b3	protein_coding	chr4	117019402	117086852	+	661.5	181	1142	-2.65082
ENSMUSG00000051344	Plekhm3	protein_coding	chr1	64789121	64956824	-	825	226	1424	-2.6502
ENSMUSG00000030867	Plk1	protein_coding	chr7	122159439	122169873	+	301	82	520	-2.6501
ENSMUSG00000031570	Plpp5	protein_coding	chr8	25720037	25724887	+	184.5	50	319	-2.6495
ENSMUSG00000015143	Actn1	protein_coding	chr12	80167547	80260371	-	14205.5	3906	24505	-2.649
ENSMUSG00000031683	Lsm6	protein_coding	chr8	78804865	78821140	-	322.5	88	557	-2.64839
ENSMUSG00000053158	Fes	protein_coding	chr7	80377758	80387946	-	608	167	1049	-2.64386
ENSMUSG00000105545	4930599N24Rik	TEC	chr3	136758958	136759960	-	13.5	3	24	-2.64386
ENSMUSG00000003847	Nfat5	protein_coding	chr8	107293470	107379516	+	20874	5760	35988	-2.64316
ENSMUSG00000028443	Nudt2	protein_coding	chr4	41465151	41480926	+	162	44	280	-2.64257
ENSMUSG00000062040	Zfp27	protein_coding	chr7	29893333	29906572	-	259.5	71	448	-2.64065
ENSMUSG00000036764	Dnajc12	protein_coding	chr10	63386563	63410576	+	46	12	80	-2.63941
ENSMUSG00000038058	Nod1	protein_coding	chr6	54923949	54972612	-	739.5	204	1275	-2.63793
ENSMUSG00000062683	Atp5g2	protein_coding	chr15	102662864	102671127	-	49.5	13	86	-2.63559
ENSMUSG00000042367	Gjb3	protein_coding	chr4	127325235	127330844	-	118	32	204	-2.63509
ENSMUSG00000028175	Depdc1a	protein_coding	chr3	159495433	159529955	+	67.5	18	117	-2.63472
ENSMUSG00000021838	Samd4	protein_coding	chr14	46882854	47105817	+	3390.5	940	5841	-2.6342
ENSMUSG00000106847	Peg13	sense_intronic	chr15	72805600	72810324	-	1213	336	2090	-2.63337
ENSMUSG00000025538	Sumf2	protein_coding	chr5	129846986	129864050	+	229.5	63	396	-2.633
ENSMUSG00000044574	5031434C07Rik	antisense_RNA	chr6	112285593	112288837	-	35	9	61	-2.63227
ENSMUSG00000020150	Gamt	protein_coding	chr10	80258151	80261012	-	17	4	30	-2.63227
ENSMUSG00000035878	Hykk	protein_coding	chr9	54917283	54949924	+	297	82	512	-2.62778
ENSMUSG00000052371	Hoxd3os1	antisense_RNA	chr2	74710043	74716130	-	60	16	104	-2.62678
ENSMUSG00000049871	Nlrc3	protein_coding	chr16	3945007	3976632	-	207	57	357	-2.62583
ENSMUSG00000103032	Gm37121	TEC	chr1	62809302	62811857	+	20.5	5	36	-2.62449
ENSMUSG00000048960	Prex2	protein_coding	chr1	10993465	11303681	+	5770	1610	9930	-2.62398
ENSMUSG00000021822	Plau	protein_coding	chr14	20836660	20843385	+	23721.5	6622	40821	-2.62379
ENSMUSG00000037326	Capn15	protein_coding	chr17	25958367	25985796	-	328.5	91	566	-2.62364
ENSMUSG00000042213	Zfand4	protein_coding	chr6	116264222	116330302	+	142	39	245	-2.62059
ENSMUSG00000021483	Cdk20	protein_coding	chr13	64432314	64441773	+	24	6	42	-2.61891
ENSMUSG00000041324	Inhba	protein_coding	chr13	16011851	16031621	+	7143.5	2000	12287	-2.61846
ENSMUSG00000045636	Mtus1	protein_coding	chr8	40990914	41133726	-	1705	477	2933	-2.61779
ENSMUSG00000039781	Cep131	protein_coding	chr11	120064430	120086827	-	116.5	32	201	-2.61382
ENSMUSG00000097431	Gm26782	lincRNA	chr14	50870364	50879003	+	529.5	148	911	-2.61372
ENSMUSG00000060044	Tmem26	protein_coding	chr10	68723746	68782650	+	1952	548	3356	-2.61229
ENSMUSG00000039899	Fgl2	protein_coding	chr5	21372642	21378374	+	204.5	57	352	-2.60554
ENSMUSG00000037772	Mrpl23	protein_coding	chr7	142533012	142540747	+	41.5	11	72	-2.60486
ENSMUSG00000029122	Evc	protein_coding	chr5	37289098	37336894	-	483.5	136	831	-2.60241
ENSMUSG00000004462	Tbccd1	protein_coding	chr16	22813215	22857569	-	193.5	54	333	-2.60234
ENSMUSG00000055660	Mettl4	protein_coding	chr17	94727080	94749892	-	409	115	703	-2.60145
ENSMUSG00000030623	Prss23os	antisense_RNA	chr7	89510007	89511873	+	52	14	90	-2.6009
ENSMUSG00000033420	Antxr1	protein_coding	chr6	87133853	87335764	-	1633.5	462	2805	-2.59943
ENSMUSG00000062604	Srpk2	protein_coding	chr5	23503264	23616534	-	1788.5	506	3071	-2.59912
ENSMUSG00000044707	Ccnjl	protein_coding	chr11	43528784	43586997	+	888	251	1525	-2.59826
ENSMUSG00000061186	Sfmbt2	protein_coding	chr2	10370510	10595253	+	200	56	344	-2.59756
ENSMUSG00000040618	Pck2	protein_coding	chr14	55540266	55550017	+	594.5	168	1021	-2.5963
ENSMUSG00000108358	Gm44509	TEC	chr7	55973519	55974842	-	76.5	21	132	-2.59585
ENSMUSG00000074364	Ehd2	protein_coding	chr7	15946958	15967567	-	9800	2785	16815	-2.59357
ENSMUSG00000028246	Faxc	protein_coding	chr4	21931331	21994751	+	438	124	752	-2.59072
ENSMUSG00000062981	Mrpl42	protein_coding	chr10	95480806	95501940	-	244	69	419	-2.58496
ENSMUSG00000103793	Pcdhga6	protein_coding	chr18	37707039	37841873	+	93.5	26	161	-2.58496
ENSMUSG00000086746	Gm15222	antisense_RNA	chr14	46387519	46389282	+	20	5	35	-2.58496
ENSMUSG00000084302	Gm12194	processed_pseudogene	chr11	50126907	50127918	-	20	5	35	-2.58496
ENSMUSG00000071550	Cfap44	protein_coding	chr16	44394799	44482428	+	20	5	35	-2.58496
ENSMUSG00000005763	Cd247	protein_coding	chr1	165788681	165871153	+	13	3	23	-2.58496
ENSMUSG00000099876	Gm29650	lincRNA	chrY	1048393	1049134	+	9.5	2	17	-2.58496
ENSMUSG00000077440	Gm23130	snoRNA	chr10	23786470	23786543	-	9.5	2	17	-2.58496
ENSMUSG00000043122	A530016L24Rik	protein_coding	chr12	112489448	112499927	+	9.5	2	17	-2.58496
ENSMUSG00000109975	Gm19196	transcribed_unprocessed_pseudogene	chr12	21543307	21554521	+	6	1	11	-2.58496
ENSMUSG00000104031	Gm17771	processed_pseudogene	chr3	19934242	19935388	+	6	1	11	-2.58496
ENSMUSG00000102703	Gm38313	TEC	chr3	85195182	85196447	-	6	1	11	-2.58496
ENSMUSG00000097554	Gm26825	lincRNA	chr5	5781530	5783636	+	6	1	11	-2.58496
ENSMUSG00000091955	Gm9844	protein_coding	chr7	24862213	24862697	+	6	1	11	-2.58496
ENSMUSG00000087266	Gm15991	antisense_RNA	chr8	67956769	67978051	+	6	1	11	-2.58496
ENSMUSG00000086506	Gm15911	antisense_RNA	chr13	55602182	55604783	-	6	1	11	-2.58496
ENSMUSG00000082064	Rpl5-ps2	processed_pseudogene	chr2	154703809	154704699	+	6	1	11	-2.58496
ENSMUSG00000020191	4930415F15Rik	protein_coding	chr11	11464256	11515192	+	6	1	11	-2.58496
ENSMUSG00000114069	AC165273.4	processed_transcript	chr13	53912263	53915748	-	2.5	0	5	-2.58496
ENSMUSG00000112275	AC122293.2	lincRNA	chr10	68313008	68326978	+	2.5	0	5	-2.58496
ENSMUSG00000112080	AC165164.2	antisense_RNA	chr10	61494917	61496290	-	2.5	0	5	-2.58496
ENSMUSG00000111815	AC107662.1	processed_pseudogene	chr9	71598835	71600140	-	2.5	0	5	-2.58496
ENSMUSG00000111223	AC241616.1	TEC	chr9	13519936	13520101	+	2.5	0	5	-2.58496
ENSMUSG00000110658	Gm45857	processed_pseudogene	chr8	122596899	122597254	-	2.5	0	5	-2.58496
ENSMUSG00000110136	Gm45785	protein_coding	chr7	140818087	140856331	-	2.5	0	5	-2.58496
ENSMUSG00000109178	Gm3257	processed_pseudogene	chr7	61938237	61938911	+	2.5	0	5	-2.58496
ENSMUSG00000108824	A230057D06Rik	lincRNA	chr7	61707739	61727752	-	2.5	0	5	-2.58496
ENSMUSG00000106446	Gm42970	TEC	chr3	127298322	127299673	-	2.5	0	5	-2.58496
ENSMUSG00000106075	Gm42804	processed_pseudogene	chr3	119757338	119757515	+	2.5	0	5	-2.58496
ENSMUSG00000104709	Gm42484	TEC	chr5	57965414	57967517	+	2.5	0	5	-2.58496
ENSMUSG00000104402	Gm38012	TEC	chr1	61677249	61680277	+	2.5	0	5	-2.58496
ENSMUSG00000104262	Gm37747	TEC	chr2	68989381	68993383	+	2.5	0	5	-2.58496
ENSMUSG00000103763	Gm37860	TEC	chr1	165467500	165468533	+	2.5	0	5	-2.58496
ENSMUSG00000103002	Gm38075	TEC	chr1	61805221	61806140	+	2.5	0	5	-2.58496
ENSMUSG00000102970	Gm37349	TEC	chr1	191597647	191598270	+	2.5	0	5	-2.58496
ENSMUSG00000101867	C78334	antisense_RNA	chr9	96017942	96024740	-	2.5	0	5	-2.58496
ENSMUSG00000099983	1700022E09Rik	lincRNA	chr16	59462909	59469238	-	2.5	0	5	-2.58496
ENSMUSG00000099221	Mir6371	miRNA	chr6	50572398	50572508	+	2.5	0	5	-2.58496
ENSMUSG00000099182	Gm8676	processed_pseudogene	chr6	7643906	7644542	+	2.5	0	5	-2.58496
ENSMUSG00000099160	Mir6415	miRNA	chr5	92458557	92458656	+	2.5	0	5	-2.58496
ENSMUSG00000099016	Gm27227	antisense_RNA	chr9	80263306	80265450	-	2.5	0	5	-2.58496
ENSMUSG00000098044	Gm9162	processed_pseudogene	chr7	33137119	33138109	+	2.5	0	5	-2.58496
ENSMUSG00000098000	Gm27026	processed_pseudogene	chr18	52472848	52473739	-	2.5	0	5	-2.58496
ENSMUSG00000093874	Gm24539	snoRNA	chr13	62136930	62137062	+	2.5	0	5	-2.58496
ENSMUSG00000093793	Gm24091	snoRNA	chr4	130766331	130766413	+	2.5	0	5	-2.58496
ENSMUSG00000093155	Gm25035	miRNA	chr1	74586896	74586972	-	2.5	0	5	-2.58496
ENSMUSG00000092223	Gm19807	processed_pseudogene	chr17	37130909	37131575	+	2.5	0	5	-2.58496
ENSMUSG00000090610	Gm3571	processed_pseudogene	chr10	93778660	93779719	+	2.5	0	5	-2.58496
ENSMUSG00000088552	Mir1957a	miRNA	chr4	119129779	119129844	+	2.5	0	5	-2.58496
ENSMUSG00000087807	Gm25559	miRNA	chr4	117570134	117570207	+	2.5	0	5	-2.58496
ENSMUSG00000086785	Gm6081	processed_pseudogene	chr13	28510744	28511232	-	2.5	0	5	-2.58496
ENSMUSG00000086689	Gm16876	antisense_RNA	chr12	91684665	91693590	+	2.5	0	5	-2.58496
ENSMUSG00000086670	Gm13194	processed_pseudogene	chr2	4942174	4942484	+	2.5	0	5	-2.58496
ENSMUSG00000086588	Gm11729	lincRNA	chr11	117414389	117415368	+	2.5	0	5	-2.58496
ENSMUSG00000086296	D030055H07Rik	antisense_RNA	chr9	106148687	106159751	+	2.5	0	5	-2.58496
ENSMUSG00000086069	Gm13708	lincRNA	chr2	73459705	73477602	+	2.5	0	5	-2.58496
ENSMUSG00000085873	Ttc39aos1	antisense_RNA	chr4	109403809	109406155	-	2.5	0	5	-2.58496
ENSMUSG00000085847	Gm14540	antisense_RNA	chr6	33038468	33043222	+	2.5	0	5	-2.58496
ENSMUSG00000085709	Gm14211	lincRNA	chr2	135686174	135693154	-	2.5	0	5	-2.58496
ENSMUSG00000085400	Pard3bos3	antisense_RNA	chr1	62456725	62499261	-	2.5	0	5	-2.58496
ENSMUSG00000084783	Gm15419	antisense_RNA	chr8	11399186	11417892	-	2.5	0	5	-2.58496
ENSMUSG00000084105	Gm13252	processed_pseudogene	chr4	132244946	132245266	-	2.5	0	5	-2.58496
ENSMUSG00000083728	Gm13854	processed_pseudogene	chr6	33375111	33377446	-	2.5	0	5	-2.58496
ENSMUSG00000082296	Gm11450	processed_pseudogene	chr2	162805590	162805922	+	2.5	0	5	-2.58496
ENSMUSG00000082208	Gm15379	processed_pseudogene	chrX	75458812	75459459	+	2.5	0	5	-2.58496
ENSMUSG00000081896	Gm5389	processed_pseudogene	chrX	57659732	57660907	+	2.5	0	5	-2.58496
ENSMUSG00000080966	Gm6263	processed_pseudogene	chr13	74018793	74020134	-	2.5	0	5	-2.58496
ENSMUSG00000080543	Gm22709	miRNA	chr18	5614473	5614583	+	2.5	0	5	-2.58496
ENSMUSG00000080396	Snord111	snoRNA	chr8	110838528	110838616	-	2.5	0	5	-2.58496
ENSMUSG00000077639	Gm22772	snoRNA	chr11	77052947	77053067	+	2.5	0	5	-2.58496
ENSMUSG00000077575	Gm24888	snoRNA	chr7	109521280	109521409	+	2.5	0	5	-2.58496
ENSMUSG00000073152	Gm10475	antisense_RNA	chr5	21910931	21954014	+	2.5	0	5	-2.58496
ENSMUSG00000071713	Csf2rb	protein_coding	chr15	78325990	78351000	+	2.5	0	5	-2.58496
ENSMUSG00000065468	Mir26b	miRNA	chr1	74394310	74394394	+	2.5	0	5	-2.58496
ENSMUSG00000064918	Gm22571	snoRNA	chr9	64175873	64175942	+	2.5	0	5	-2.58496
ENSMUSG00000064347	mt-Ta	Mt_tRNA	chrM	5018	5086	-	2.5	0	5	-2.58496
ENSMUSG00000056529	Ptafr	protein_coding	chr4	132564067	132582683	+	2.5	0	5	-2.58496
ENSMUSG00000055003	Lrtm2	protein_coding	chr6	119315133	119330766	-	2.5	0	5	-2.58496
ENSMUSG00000053173	Rpl18-ps2	processed_pseudogene	chr6	128313357	128313923	+	2.5	0	5	-2.58496
ENSMUSG00000045709	Smkr-ps	lincRNA	chr6	29985331	29993776	+	2.5	0	5	-2.58496
ENSMUSG00000044362	Ccdc89	protein_coding	chr7	90426577	90428669	+	2.5	0	5	-2.58496
ENSMUSG00000044296	Zfp879	protein_coding	chr11	50832031	50841552	-	2.5	0	5	-2.58496
ENSMUSG00000040808	S100g	protein_coding	chrX	162961992	162964599	-	2.5	0	5	-2.58496
ENSMUSG00000038421	Fcrla	protein_coding	chr1	170917576	170927583	-	2.5	0	5	-2.58496
ENSMUSG00000037463	Fbxo27	protein_coding	chr7	28692849	28699338	+	2.5	0	5	-2.58496
ENSMUSG00000036853	Mcoln3	protein_coding	chr3	146121672	146141806	+	2.5	0	5	-2.58496
ENSMUSG00000036826	Igflr1	protein_coding	chr7	30565427	30567962	+	2.5	0	5	-2.58496
ENSMUSG00000031981	Capn9	protein_coding	chr8	124576111	124618731	+	2.5	0	5	-2.58496
ENSMUSG00000030731	Syt3	protein_coding	chr7	44384102	44400187	+	2.5	0	5	-2.58496
ENSMUSG00000029659	Medag	protein_coding	chr5	149411749	149431723	+	2.5	0	5	-2.58496
ENSMUSG00000028553	Angptl3	protein_coding	chr4	99030954	99038065	+	2.5	0	5	-2.58496
ENSMUSG00000022227	Mcpt1	protein_coding	chr14	56017964	56020391	+	2.5	0	5	-2.58496
ENSMUSG00000035900	Gramd4	protein_coding	chr15	86057695	86137634	+	4704	1346	8062	-2.58157
ENSMUSG00000031310	Zmym3	protein_coding	chrX	101404384	101420849	-	435	124	746	-2.57918
ENSMUSG00000031534	Smim19	protein_coding	chr8	22462614	22476882	-	128	36	220	-2.57845
ENSMUSG00000039405	Prss23	protein_coding	chr7	89507783	89527187	-	12757.5	3659	21856	-2.57818
ENSMUSG00000058503	Fam133b	protein_coding	chr5	3543833	3570238	+	1668.5	478	2859	-2.57792
ENSMUSG00000034538	Zfp418	protein_coding	chr7	7171330	7183562	+	86	24	148	-2.57531
ENSMUSG00000097971	Gm26917	lincRNA	chr17	39843013	39846341	+	454261	130736	777786	-2.57271
ENSMUSG00000030839	Sergef	protein_coding	chr7	46443154	46639807	-	61.5	17	106	-2.57154
ENSMUSG00000060470	Adgrg3	protein_coding	chr8	95017692	95045250	+	9942.5	2870	17015	-2.56727
ENSMUSG00000003228	Grk5	protein_coding	chr19	60889749	61092553	+	4231	1221	7241	-2.56714
ENSMUSG00000087355	Gm13187	processed_transcript	chr2	4291159	4301167	-	44	12	76	-2.56635
ENSMUSG00000018381	Abi3	protein_coding	chr11	95830074	95842409	-	500.5	144	857	-2.56492
ENSMUSG00000027952	Pmvk	protein_coding	chr3	89454541	89469013	+	165	47	283	-2.56478
ENSMUSG00000038067	Csf3	protein_coding	chr11	98701263	98703629	+	109.5	31	188	-2.56224
ENSMUSG00000027852	Nras	protein_coding	chr3	103058285	103067914	+	3127	905	5349	-2.56196
ENSMUSG00000027010	Slc25a12	protein_coding	chr2	71271063	71367749	-	734	212	1256	-2.56106
ENSMUSG00000062761	Zfp512	protein_coding	chr5	31452435	31481754	+	868	251	1485	-2.55994
ENSMUSG00000070709	Zfp974	protein_coding	chr7	27907392	27929430	-	99	28	170	-2.55987
ENSMUSG00000010721	Lmbr1	protein_coding	chr5	29229802	29378390	-	261	75	447	-2.55943
ENSMUSG00000026603	Smyd2	protein_coding	chr1	189880492	189922363	-	1205.5	349	2062	-2.55932
ENSMUSG00000001493	Meox1	protein_coding	chr11	101877510	101894374	-	1904.5	553	3256	-2.55559
ENSMUSG00000027257	Pacsin3	protein_coding	chr2	91256162	91264679	+	167.5	48	287	-2.55522
ENSMUSG00000074916	Chst14	protein_coding	chr2	118926496	118928585	+	415	120	710	-2.55484
ENSMUSG00000102850	Gm37082	TEC	chr9	32535251	32537177	-	54	15	93	-2.55459
ENSMUSG00000040841	Six5	protein_coding	chr7	19094594	19098549	+	26.5	7	46	-2.55459
ENSMUSG00000040687	Madd	protein_coding	chr2	91137360	91183818	-	1142.5	332	1953	-2.55284
ENSMUSG00000021123	Rdh12	protein_coding	chr12	79208914	79222665	+	126	36	216	-2.5521
ENSMUSG00000018417	Myo1b	protein_coding	chr1	51749765	51916071	-	4120.5	1200	7041	-2.55175
ENSMUSG00000046191	Pcdhb20	protein_coding	chr18	37504264	37507822	+	327	95	559	-2.54432
ENSMUSG00000075588	Hoxb2	protein_coding	chr11	96351631	96354012	+	19.5	5	34	-2.54432
ENSMUSG00000046523	Kctd4	protein_coding	chr14	75955003	75965217	+	19.5	5	34	-2.54432
ENSMUSG00000006526	Tmem110	protein_coding	chr14	30825594	30877209	+	302.5	88	517	-2.54107
ENSMUSG00000002870	Mcm2	protein_coding	chr6	88883474	88898780	-	1689.5	495	2884	-2.54016
ENSMUSG00000009681	Bcr	protein_coding	chr10	75060592	75184921	+	6539.5	1919	11160	-2.53929
ENSMUSG00000029710	Ephb4	protein_coding	chr5	137350109	137374532	+	7547.5	2215	12880	-2.53921
ENSMUSG00000071337	Tia1	protein_coding	chr6	86404219	86433405	+	805.5	236	1375	-2.53752
ENSMUSG00000055447	Cd47	protein_coding	chr16	49855618	49915010	+	7411	2178	12644	-2.53683
ENSMUSG00000094634	Gm3468	protein_coding	chr14	6087295	6108665	-	16	4	28	-2.53605
ENSMUSG00000016087	Fli1	protein_coding	chr9	32422204	32541595	-	4184	1230	7138	-2.53589
ENSMUSG00000031639	Tlr3	protein_coding	chr8	45395665	45410619	-	702.5	206	1199	-2.53533
ENSMUSG00000097392	D930016D06Rik	lincRNA	chr5	104525735	104554207	+	165.5	48	283	-2.53504
ENSMUSG00000021646	Mccc2	protein_coding	chr13	99948533	100015639	-	148.5	43	254	-2.53492
ENSMUSG00000057182	Scn3a	protein_coding	chr2	65457118	65567627	-	14993.5	4416	25571	-2.53343
ENSMUSG00000027086	Fastkd1	protein_coding	chr2	69686815	69712606	-	233	68	398	-2.53172
ENSMUSG00000049489	Fam58b	protein_coding	chr11	78750506	78751729	-	107.5	31	184	-2.53138
ENSMUSG00000112297	CT572999.1	processed_pseudogene	chr12	4225785	4228401	+	29.5	8	51	-2.53051
ENSMUSG00000063179	Pstk	protein_coding	chr7	131371141	131387839	+	127.5	37	218	-2.52686
ENSMUSG00000028480	Glipr2	protein_coding	chr4	43957401	43979118	+	2030.5	600	3461	-2.52617
ENSMUSG00000054555	Adam12	protein_coding	chr7	133883199	134225097	-	992.5	293	1692	-2.52569
ENSMUSG00000024590	Lmnb1	protein_coding	chr18	56707813	56753424	+	2606.5	771	4442	-2.52486
ENSMUSG00000105848	Gm42683	TEC	chr13	19393126	19395453	-	12.5	3	22	-2.52356
ENSMUSG00000093336	Mir1954	miRNA	chr2	32652329	32652414	+	12.5	3	22	-2.52356
ENSMUSG00000030265	Kras	protein_coding	chr6	145216699	145250239	-	3419.5	1013	5826	-2.5227
ENSMUSG00000036875	Dna2	protein_coding	chr10	62947026	62974185	+	110	32	188	-2.51785
ENSMUSG00000031403	Dkc1	protein_coding	chrX	75095854	75109777	+	1794	533	3055	-2.51673
ENSMUSG00000020312	Shc2	protein_coding	chr10	79618652	79637918	-	59.5	17	102	-2.51658
ENSMUSG00000003033	Ap1m1	protein_coding	chr8	72240018	72257385	+	1359	404	2314	-2.51502
ENSMUSG00000046768	Rhoj	protein_coding	chr12	75308322	75401456	+	4609.5	1372	7847	-2.51499
ENSMUSG00000040429	Mterf1a	protein_coding	chr5	3890581	3893933	-	22.5	6	39	-2.51457
ENSMUSG00000025597	Klhl4	protein_coding	chrX	114474333	114560829	+	17765	5296	30234	-2.51297
ENSMUSG00000039234	Sec24d	protein_coding	chr3	123267455	123365641	+	2112	630	3594	-2.51028
ENSMUSG00000047867	Gimap6	protein_coding	chr6	48701582	48708225	-	2641	788	4494	-2.51022
ENSMUSG00000020272	Stk10	protein_coding	chr11	32533305	32624587	+	196.5	58	335	-2.50967
ENSMUSG00000076448	Mir763	miRNA	chr10	120447991	120448110	-	42.5	12	73	-2.50901
ENSMUSG00000021266	Wars	protein_coding	chr12	108860030	108894174	-	1290.5	385	2196	-2.50886
ENSMUSG00000090958	Lrrc32	protein_coding	chr7	98489697	98502181	+	9273	2771	15775	-2.50873
ENSMUSG00000022940	Pigp	protein_coding	chr16	94358763	94371015	-	106	31	181	-2.50779
ENSMUSG00000019732	Calr3	protein_coding	chr8	72424176	72443870	-	106	31	181	-2.50779
ENSMUSG00000037239	Spred3	protein_coding	chr7	29158829	29168647	-	570	170	970	-2.50547
ENSMUSG00000041731	Pgm5	protein_coding	chr19	24683016	24861855	-	289	86	492	-2.5025
ENSMUSG00000032218	Ccnb2	protein_coding	chr9	70407692	70421547	-	279	83	475	-2.5025
ENSMUSG00000075271	Ttc30a1	protein_coding	chr2	75978247	75981967	-	59	17	101	-2.5025
ENSMUSG00000110405	Gm45534	TEC	chr8	57604818	57607156	-	9	2	16	-2.5025
ENSMUSG00000109358	Gm44716	TEC	chr8	11290558	11291267	-	9	2	16	-2.5025
ENSMUSG00000107432	Gm36189	processed_pseudogene	chr6	88882655	88883177	+	9	2	16	-2.5025
ENSMUSG00000103697	Gm38020	TEC	chrX	103576426	103581101	-	9	2	16	-2.5025
ENSMUSG00000087605	Gm15742	sense_intronic	chr16	30969393	30973518	-	9	2	16	-2.5025
ENSMUSG00000080877	Rpl22-ps1	processed_pseudogene	chrX	8038611	8038996	-	9	2	16	-2.5025
ENSMUSG00000050288	Fzd2	protein_coding	chr11	102604396	102608058	+	9	2	16	-2.5025
ENSMUSG00000033847	Pla2g4c	protein_coding	chr7	13324655	13360672	+	9	2	16	-2.5025
ENSMUSG00000030155	Clec2e	protein_coding	chr6	129091998	129100913	-	9	2	16	-2.5025
ENSMUSG00000006221	Hspb7	protein_coding	chr4	141420779	141425311	+	9	2	16	-2.5025
ENSMUSG00000039096	Rsad1	protein_coding	chr11	94539798	94549199	-	142	42	242	-2.49855
ENSMUSG00000033423	Eri3	protein_coding	chr4	117550365	117674297	+	418	125	711	-2.49845
ENSMUSG00000033377	Palmd	protein_coding	chr3	116918258	116968987	-	669.5	201	1138	-2.49534
ENSMUSG00000036632	Alg5	protein_coding	chr3	54735539	54749795	+	433.5	130	737	-2.49405
ENSMUSG00000014837	4931428F04Rik	protein_coding	chr8	105280409	105289864	-	68.5	20	117	-2.49033
ENSMUSG00000011263	Exoc3l2	protein_coding	chr7	19463331	19496762	+	4489	1356	7622	-2.48994
ENSMUSG00000054409	Tmem74	protein_coding	chr15	43866695	43870029	-	42	12	72	-2.48938
ENSMUSG00000051236	Msrb3	protein_coding	chr10	120781096	120899101	-	10939	3307	18571	-2.4891
ENSMUSG00000039178	Tbc1d19	protein_coding	chr5	53809627	53903965	+	602.5	182	1023	-2.4843
ENSMUSG00000031065	Cdk16	protein_coding	chrX	20687954	20699880	+	1994	604	3384	-2.48415
ENSMUSG00000026637	Traf5	protein_coding	chr1	191997430	192092559	-	104.5	31	178	-2.48382
ENSMUSG00000085396	Firre	processed_transcript	chrX	50563125	50635066	-	447	135	759	-2.48239
ENSMUSG00000003452	Bicd1	protein_coding	chr6	149408984	149563329	+	84.5	25	144	-2.47947
ENSMUSG00000063320	1190007I07Rik	protein_coding	chr10	82619851	82623228	-	22	6	38	-2.47805
ENSMUSG00000059897	Zfp930	protein_coding	chr8	69209038	69230536	+	520.5	158	883	-2.47502
ENSMUSG00000052713	Zfp608	protein_coding	chr18	54888045	54990180	-	1471.5	448	2495	-2.47483
ENSMUSG00000107331	Gm42732	TEC	chr5	73311364	73312560	+	28.5	8	49	-2.47393
ENSMUSG00000029920	Smarcad1	protein_coding	chr6	65042609	65116061	+	3471.5	1059	5884	-2.47298
ENSMUSG00000036890	Gtdc1	protein_coding	chr2	44564412	44927236	-	287	87	487	-2.47131
ENSMUSG00000099689	Zfp383	protein_coding	chr7	29908517	29916807	+	84	25	143	-2.46949
ENSMUSG00000035385	Ccl2	protein_coding	chr11	82035571	82037453	+	2826.5	864	4789	-2.46925
ENSMUSG00000023284	Zfp605	protein_coding	chr5	110110092	110129794	+	250	76	424	-2.46453
ENSMUSG00000103037	Pcdhgb1	protein_coding	chr18	37680233	37841870	+	227	69	385	-2.46317
ENSMUSG00000032185	Carm1	protein_coding	chr9	21546894	21589487	+	916	281	1551	-2.46036
ENSMUSG00000024352	Spata24	protein_coding	chr18	35656690	35662186	-	44.5	13	76	-2.45943
ENSMUSG00000103509	Gm38372	TEC	chr1	7148110	7152137	+	25	7	43	-2.45943
ENSMUSG00000022818	Cyp2ab1	protein_coding	chr16	20308387	20323065	-	25	7	43	-2.45943
ENSMUSG00000114937	AC121801.1	antisense_RNA	chr14	20364567	20378876	-	18.5	5	32	-2.45943
ENSMUSG00000109154	Gm44822	TEC	chr7	49814202	49820590	+	12	3	21	-2.45943
ENSMUSG00000043496	Tril	protein_coding	chr6	53815468	53820830	-	12	3	21	-2.45943
ENSMUSG00000004473	Clec11a	protein_coding	chr7	44302687	44306902	-	12	3	21	-2.45943
ENSMUSG00000110580	D830024N08Rik	antisense_RNA	chr8	83576044	83585919	+	5.5	1	10	-2.45943
ENSMUSG00000109517	Gm44763	antisense_RNA	chr7	118967668	118969686	-	5.5	1	10	-2.45943
ENSMUSG00000108154	Gm44033	TEC	chr6	113718584	113719278	+	5.5	1	10	-2.45943
ENSMUSG00000107814	Gm35876	processed_pseudogene	chr6	147028001	147028459	+	5.5	1	10	-2.45943
ENSMUSG00000107182	Gm43268	TEC	chr5	53905164	53909218	+	5.5	1	10	-2.45943
ENSMUSG00000098135	Gm6946	processed_pseudogene	chr7	12742686	12743672	+	5.5	1	10	-2.45943
ENSMUSG00000097564	C430014B12Rik	processed_transcript	chr1	82691928	82725169	-	5.5	1	10	-2.45943
ENSMUSG00000083912	Gm5391	processed_pseudogene	chrX	68319638	68320250	-	5.5	1	10	-2.45943
ENSMUSG00000067547	Gm7666	transcribed_processed_pseudogene	chr15	6653923	6654741	+	5.5	1	10	-2.45943
ENSMUSG00000065904	Gm26109	snoRNA	chr18	34942644	34942713	-	5.5	1	10	-2.45943
ENSMUSG00000025961	4933402D24Rik	protein_coding	chr1	63754907	63769267	-	5.5	1	10	-2.45943
ENSMUSG00000030598	Fbxo17	protein_coding	chr7	28716804	28738144	+	132	40	224	-2.45623
ENSMUSG00000021111	Papola	protein_coding	chr12	105784694	105838807	+	7669.5	2364	12975	-2.45593
ENSMUSG00000098973	Mir6236	miRNA	chr9	110281287	110281409	+	326.5	100	553	-2.45553
ENSMUSG00000043300	B3galnt1	protein_coding	chr3	69574158	69598960	-	148	45	251	-2.45372
ENSMUSG00000020198	Ap3d1	protein_coding	chr10	80706956	80742264	-	3071.5	948	5195	-2.45292
ENSMUSG00000009575	Cbx5	protein_coding	chr15	103191544	103239816	-	5285.5	1632	8939	-2.45275
ENSMUSG00000069743	Zfp820	protein_coding	chr17	21816876	21845759	-	426	131	721	-2.45146
ENSMUSG00000025821	Zfp282	protein_coding	chr6	47877204	47908485	+	455	140	770	-2.45104
ENSMUSG00000058979	Hdhd5	protein_coding	chr6	120509494	120531319	-	96	29	163	-2.45066
ENSMUSG00000024613	Tcof1	protein_coding	chr18	60813755	60848971	-	778	240	1316	-2.45015
ENSMUSG00000048142	Nat8l	protein_coding	chr5	33995984	34005916	+	105.5	32	179	-2.44746
ENSMUSG00000046410	Kcnk6	protein_coding	chr7	29221926	29232515	-	115	35	195	-2.44478
ENSMUSG00000028525	Pde4b	protein_coding	chr4	102087543	102607259	+	8730	2711	14749	-2.44329
ENSMUSG00000037628	Cdkn3	protein_coding	chr14	46760541	46771525	+	73	22	124	-2.44222
ENSMUSG00000027208	Fgf7	protein_coding	chr2	126034658	126091185	+	44	13	75	-2.44057
ENSMUSG00000106024	A530083M17Rik	TEC	chr3	153309370	153312745	-	21.5	6	37	-2.44057
ENSMUSG00000064390	Rnu73b	snoRNA	chr3	86140618	86140688	-	21.5	6	37	-2.44057
ENSMUSG00000045062	Pcdhb7	protein_coding	chr18	37341702	37345202	+	21.5	6	37	-2.44057
ENSMUSG00000108900	C430049E01Rik	protein_coding	chr8	71520120	71525711	-	239	74	404	-2.43296
ENSMUSG00000080717	B230307C23Rik	protein_coding	chr16	97997323	98010000	+	31	9	53	-2.43296
ENSMUSG00000109799	Gm45515	antisense_RNA	chr7	110277782	110281527	-	15	4	26	-2.43296
ENSMUSG00000102267	9530003O04Rik	TEC	chr16	77654531	77655438	+	15	4	26	-2.43296
ENSMUSG00000026341	Actr3	protein_coding	chr1	125392905	125435727	-	9003.5	2814	15193	-2.43229
ENSMUSG00000109115	Gm44669	TEC	chr7	67679335	67681303	-	104.5	32	177	-2.43134
ENSMUSG00000091337	Eid1	protein_coding	chr2	125673095	125674785	+	2119	663	3575	-2.42909
ENSMUSG00000044229	Nxpe4	protein_coding	chr9	48162023	48400025	+	283	88	478	-2.42815
ENSMUSG00000018761	Mpdu1	protein_coding	chr11	69656697	69662642	-	168	52	284	-2.4269
ENSMUSG00000050627	Gpd1l	protein_coding	chr9	114899341	114933987	-	502	157	847	-2.42414
ENSMUSG00000022554	Hgh1	protein_coding	chr15	76368898	76371403	+	94.5	29	160	-2.42403
ENSMUSG00000029676	Pot1a	protein_coding	chr6	25743737	25809226	-	416	130	702	-2.42396
ENSMUSG00000097177	9330159M07Rik	processed_transcript	chr9	88840236	88858870	-	34	10	58	-2.42321
ENSMUSG00000012483	Rpa3	protein_coding	chr6	8255936	8259173	-	113.5	35	192	-2.42253
ENSMUSG00000020599	Rgs9	protein_coding	chr11	109225355	109298129	-	422	132	712	-2.42248
ENSMUSG00000023940	Sgo1	protein_coding	chr17	53674786	53689333	-	326.5	102	551	-2.42202
ENSMUSG00000028608	0610037L13Rik	protein_coding	chr4	107889813	107899384	+	545	171	919	-2.41923
ENSMUSG00000031875	Cmtm3	protein_coding	chr8	104340318	104347672	+	1411.5	444	2379	-2.41908
ENSMUSG00000000581	C1d	protein_coding	chr11	17257594	17269176	+	519.5	163	876	-2.41888
ENSMUSG00000003813	Rad23a	protein_coding	chr8	84834652	84840665	-	1290.5	406	2175	-2.41858
ENSMUSG00000028969	Cdk5	protein_coding	chr5	24418241	24423530	-	211.5	66	357	-2.41773
ENSMUSG00000037656	Slc20a2	protein_coding	chr8	22476788	22569612	+	896.5	282	1511	-2.41758
ENSMUSG00000090081	Gm16587	antisense_RNA	chr1	164143432	164146366	-	18	5	31	-2.41504
ENSMUSG00000103159	F830112A20Rik	TEC	chr1	36922797	36926348	-	8.5	2	15	-2.41504
ENSMUSG00000085239	Gm12150	antisense_RNA	chr11	43579602	43581116	-	8.5	2	15	-2.41504
ENSMUSG00000053030	Spink2	protein_coding	chr5	77205107	77211471	-	8.5	2	15	-2.41504
ENSMUSG00000039765	Cc2d2a	protein_coding	chr5	43662346	43740972	+	365.5	115	616	-2.41115
ENSMUSG00000056832	Ttc26	protein_coding	chr6	38381469	38427647	+	119	37	201	-2.41028
ENSMUSG00000085586	Gm11613	processed_transcript	chr11	97644184	97660367	-	59	18	100	-2.41028
ENSMUSG00000020357	Flt4	protein_coding	chr11	49609263	49652739	+	25152.5	7982	42323	-2.40647
ENSMUSG00000015247	Nipsnap3b	protein_coding	chr4	53011880	53022060	+	285.5	90	481	-2.40509
ENSMUSG00000028629	Exo5	protein_coding	chr4	120921196	120925005	-	304	96	512	-2.4029
ENSMUSG00000069273	Hist1h3e	protein_coding	chr13	23561534	23562369	-	65	20	110	-2.4021
ENSMUSG00000035775	Krt20	protein_coding	chr11	99428403	99438150	-	21	6	36	-2.4021
ENSMUSG00000032243	Itga11	protein_coding	chr9	62677826	62783982	+	21	6	36	-2.4021
ENSMUSG00000024395	Lims2	protein_coding	chr18	31931325	31958619	+	33.5	10	57	-2.39855
ENSMUSG00000021000	Ctage5	protein_coding	chr12	59095800	59191583	+	2592	828	4356	-2.39389
ENSMUSG00000028243	Ubxn2b	protein_coding	chr4	6191098	6221688	+	371	118	624	-2.39289
ENSMUSG00000103493	Gm37411	TEC	chr1	164424713	164426994	+	11.5	3	20	-2.39232
ENSMUSG00000031312	Itgb1bp2	protein_coding	chrX	101449088	101453541	+	11.5	3	20	-2.39232
ENSMUSG00000000355	Mcts1	protein_coding	chrX	38600655	38613426	+	586	187	985	-2.39085
ENSMUSG00000034714	Ttyh2	protein_coding	chr11	114675431	114720977	+	392	125	659	-2.38904
ENSMUSG00000029499	Pxmp2	protein_coding	chr5	110274282	110286186	-	130	41	219	-2.38904
ENSMUSG00000102841	Gm38036	TEC	chr1	194677002	194680565	+	39.5	12	67	-2.38702
ENSMUSG00000029121	Crmp1	protein_coding	chr5	37242080	37292133	+	765	245	1285	-2.38616
ENSMUSG00000104524	Gm37333	TEC	chr1	135523088	135525338	-	27	8	46	-2.38466
ENSMUSG00000005667	Mthfd2	protein_coding	chr6	83305691	83317606	-	650.5	209	1092	-2.37983
ENSMUSG00000104273	A530064N14Rik	TEC	chr9	72687224	72688715	+	76.5	24	129	-2.37851
ENSMUSG00000043190	Rfesd	protein_coding	chr13	76001535	76018719	-	76.5	24	129	-2.37851
ENSMUSG00000085197	1700125H03Rik	antisense_RNA	chr8	68368466	68375710	+	14.5	4	25	-2.37851
ENSMUSG00000051373	Plpp7	protein_coding	chr2	32095528	32110820	+	14.5	4	25	-2.37851
ENSMUSG00000104346	Pcdhga3	protein_coding	chr18	37674307	37841873	+	299.5	96	503	-2.37737
ENSMUSG00000047181	Samd14	protein_coding	chr11	95009879	95026087	+	209.5	67	352	-2.37606
ENSMUSG00000054021	Sirt5	protein_coding	chr13	43365496	43395203	+	64	20	108	-2.37587
ENSMUSG00000002617	Zfp40	protein_coding	chr17	23173869	23193252	-	373.5	120	627	-2.37576
ENSMUSG00000021809	Nudt13	protein_coding	chr14	20294697	20317578	+	82.5	26	139	-2.3744
ENSMUSG00000050908	Tvp23a	protein_coding	chr16	10420557	10447362	-	159.5	51	268	-2.37102
ENSMUSG00000015335	Zdhhc12	protein_coding	chr2	30090944	30093648	-	239.5	77	402	-2.36923
ENSMUSG00000073802	Cdkn2b	protein_coding	chr4	89306289	89311032	-	2758.5	894	4623	-2.36918
ENSMUSG00000051989	Smim11	protein_coding	chr16	92301286	92313041	+	131.5	42	221	-2.36815
ENSMUSG00000078866	Zfp970	protein_coding	chr2	177464733	177478129	+	140.5	45	236	-2.36518
ENSMUSG00000025531	Chm	protein_coding	chrX	113040593	113185517	-	2742	891	4593	-2.36464
ENSMUSG00000060336	Zfp937	protein_coding	chr2	150218073	150240725	+	168	54	282	-2.3633
ENSMUSG00000020064	Herc4	protein_coding	chr10	63243911	63317878	+	1621	527	2715	-2.36287
ENSMUSG00000001467	Cyp51	protein_coding	chr5	4081145	4104746	-	1697.5	552	2843	-2.36257
ENSMUSG00000114796	AC144949.1	antisense_RNA	chr19	40297971	40299555	+	20.5	6	35	-2.36257
ENSMUSG00000055435	Maf	protein_coding	chr8	115682942	115707794	-	4101	1336	6866	-2.36068
ENSMUSG00000024142	Mlst8	protein_coding	chr17	24473550	24479078	-	317.5	103	532	-2.35755
ENSMUSG00000025140	Pycr1	protein_coding	chr11	120635712	120643748	-	97	31	163	-2.35755
ENSMUSG00000042195	Slc35f2	protein_coding	chr9	53771538	53818154	+	23.5	7	40	-2.35755
ENSMUSG00000040152	Thbs1	protein_coding	chr2	118111876	118127133	+	108513	35444	181582	-2.35698
ENSMUSG00000042745	Id1	protein_coding	chr2	152736251	152737410	+	1556.5	508	2605	-2.3561
ENSMUSG00000031871	Cdh5	protein_coding	chr8	104101625	104144511	+	54368	17776	90960	-2.35524
ENSMUSG00000003731	Kpna6	protein_coding	chr4	129643980	129672767	-	2145.5	701	3590	-2.35484
ENSMUSG00000069662	Marcks	protein_coding	chr10	37133375	37138920	-	8892	2913	14871	-2.35153
ENSMUSG00000021694	Ercc8	protein_coding	chr13	108158738	108194985	+	87.5	28	147	-2.35147
ENSMUSG00000011256	Adam19	protein_coding	chr11	46055992	46147343	+	1921.5	629	3214	-2.3514
ENSMUSG00000022701	Ccdc191	protein_coding	chr16	43889800	43964314	+	154.5	50	259	-2.34994
ENSMUSG00000042354	Gnl3	protein_coding	chr14	31012434	31019089	-	1681.5	551	2812	-2.34937
ENSMUSG00000037784	Dzip1l	protein_coding	chr9	99629542	99669256	+	194	63	325	-2.34873
ENSMUSG00000024620	Pdgfrb	protein_coding	chr18	61045150	61085061	+	96.5	31	162	-2.34873
ENSMUSG00000062098	Btbd3	protein_coding	chr2	138256565	138287422	+	12184.5	3999	20370	-2.34844
ENSMUSG00000027353	Mcm8	protein_coding	chr2	132816141	132844197	+	200	65	335	-2.34792
ENSMUSG00000030225	Dera	protein_coding	chr6	137754556	137857340	+	339.5	111	568	-2.34493
ENSMUSG00000103749	Pcdhgb5	protein_coding	chr18	37731009	37841873	+	154	50	258	-2.34438
ENSMUSG00000028455	Stoml2	protein_coding	chr4	43027690	43031710	-	448.5	147	750	-2.34322
ENSMUSG00000058655	Eif4b	protein_coding	chr15	102073773	102097172	+	7931.5	2614	13249	-2.34111
ENSMUSG00000106627	Gm21680	protein_coding	chr5	25965961	25972663	-	44.5	14	75	-2.34104
ENSMUSG00000024104	Washc2	protein_coding	chr6	116208038	116262686	+	2952	973	4931	-2.34018
ENSMUSG00000046111	Cep295	protein_coding	chr9	15316920	15357788	-	1232.5	406	2059	-2.33954
ENSMUSG00000028550	Atg4c	protein_coding	chr4	99193934	99259787	+	589	194	984	-2.33665
ENSMUSG00000021951	Eef1akmt1	protein_coding	chr14	57549597	57571612	-	183	60	306	-2.33136
ENSMUSG00000024885	Aldh3b1	protein_coding	chr19	3913493	3929761	-	101.5	33	170	-2.33039
ENSMUSG00000038534	Osbpl7	protein_coding	chr11	97050628	97068904	+	161.5	53	270	-2.32726
ENSMUSG00000024054	Smchd1	protein_coding	chr17	71344489	71475343	-	3626.5	1205	6048	-2.32647
ENSMUSG00000095115	Itpripl2	protein_coding	chr7	118485111	118491975	-	20488.5	6825	34152	-2.3229
ENSMUSG00000038954	Supt3	protein_coding	chr17	44777152	45119290	+	272	90	454	-2.32193
ENSMUSG00000006395	Hyi	polymorphic_pseudogene	chr4	118359990	118362744	+	74	24	124	-2.32193
ENSMUSG00000021496	Pcbd2	protein_coding	chr13	55727368	55776830	+	35	11	59	-2.32193
ENSMUSG00000087201	Gm15261	antisense_RNA	chrX	169037674	169106536	-	23	7	39	-2.32193
ENSMUSG00000103285	Gm37274	TEC	chr2	156084610	156086291	-	20	6	34	-2.32193
ENSMUSG00000024891	Slc29a2	protein_coding	chr19	5024006	5031971	+	17	5	29	-2.32193
ENSMUSG00000089679	Gm16299	antisense_RNA	chr19	53819354	53825128	-	11	3	19	-2.32193
ENSMUSG00000080463	Gm22489	snoRNA	chr1	161035850	161035911	+	11	3	19	-2.32193
ENSMUSG00000107165	Gm43747	TEC	chr5	74575947	74577276	+	8	2	14	-2.32193
ENSMUSG00000104432	A430027C01Rik	TEC	chr9	72011376	72013019	-	8	2	14	-2.32193
ENSMUSG00000103349	Gm36888	lincRNA	chr3	147620811	147635647	-	8	2	14	-2.32193
ENSMUSG00000096349	Gm22513	snRNA	chr12	54696782	54696945	+	8	2	14	-2.32193
ENSMUSG00000090363	Gm3512	protein_coding	chr14	7153511	7174533	-	8	2	14	-2.32193
ENSMUSG00000088219	Gm22077	snoRNA	chr15	80080251	80080343	-	8	2	14	-2.32193
ENSMUSG00000082981	Polr2k-ps	processed_pseudogene	chr11	95761491	95761665	+	8	2	14	-2.32193
ENSMUSG00000082816	Gm11953	processed_pseudogene	chr11	3951714	3952716	+	8	2	14	-2.32193
ENSMUSG00000082186	Gm12403	processed_pseudogene	chr4	41168646	41169604	+	8	2	14	-2.32193
ENSMUSG00000025732	Mcrip2	protein_coding	chr17	25863698	25868738	-	8	2	14	-2.32193
ENSMUSG00000110803	AC156795.1	antisense_RNA	chr9	59826257	59941077	-	5	1	9	-2.32193
ENSMUSG00000105733	Gm42973	TEC	chr3	127240576	127243775	-	5	1	9	-2.32193
ENSMUSG00000103284	3110080O07Rik	TEC	chr3	51829385	51830405	-	5	1	9	-2.32193
ENSMUSG00000102277	A130050O07Rik	TEC	chr1	137927251	137930273	+	5	1	9	-2.32193
ENSMUSG00000097998	Gm27019	lincRNA	chr6	31063092	31063495	-	5	1	9	-2.32193
ENSMUSG00000097518	Gm26694	lincRNA	chr17	25794894	25964784	+	5	1	9	-2.32193
ENSMUSG00000097509	B230322F03Rik	antisense_RNA	chr7	35555367	35556935	+	5	1	9	-2.32193
ENSMUSG00000086382	Chrna1os	antisense_RNA	chr2	73584850	73589187	+	5	1	9	-2.32193
ENSMUSG00000085437	1700047A11Rik	antisense_RNA	chr8	26082609	26096522	+	5	1	9	-2.32193
ENSMUSG00000064440	Gm26224	snoRNA	chr1	161035394	161035473	+	5	1	9	-2.32193
ENSMUSG00000056290	Ms4a4b	protein_coding	chr19	11443573	11463549	+	5	1	9	-2.32193
ENSMUSG00000055978	Fut2	protein_coding	chr7	45648591	45666394	-	5	1	9	-2.32193
ENSMUSG00000033966	Cdkl4	protein_coding	chr17	80523550	80563834	-	5	1	9	-2.32193
ENSMUSG00000032549	Rab6b	protein_coding	chr9	103111787	103185276	+	115.5	38	193	-2.31451
ENSMUSG00000000326	Comt	protein_coding	chr16	18406886	18426852	-	1833	613	3053	-2.31439
ENSMUSG00000039763	Dnajc28	protein_coding	chr16	91614257	91618999	-	181	60	302	-2.31244
ENSMUSG00000029501	Ankle2	protein_coding	chr5	110231004	110256651	+	1863	624	3102	-2.31174
ENSMUSG00000095440	Fignl2	protein_coding	chr15	101050194	101078567	-	76.5	25	128	-2.31079
ENSMUSG00000026192	Atic	protein_coding	chr1	71557150	71579631	+	2607	875	4339	-2.30869
ENSMUSG00000032612	Usp4	protein_coding	chr9	108347853	108392545	+	3314.5	1113	5516	-2.30813
ENSMUSG00000108402	9430064I24Rik	TEC	chr7	127800094	127802762	-	61.5	20	103	-2.30812
ENSMUSG00000032263	Bckdhb	protein_coding	chr9	83925145	84124240	+	121	40	202	-2.30778
ENSMUSG00000026605	Cenpf	protein_coding	chr1	189640606	189688086	-	1345	453	2237	-2.30145
ENSMUSG00000031997	Trpc6	protein_coding	chr9	8544142	8680741	+	111.5	37	186	-2.29897
ENSMUSG00000026600	Soat1	protein_coding	chr1	156424525	156474331	-	5656	1911	9401	-2.29789
ENSMUSG00000025915	Sgk3	protein_coding	chr1	9798107	9900845	+	11832.5	3999	19666	-2.29771
ENSMUSG00000032298	Neil1	protein_coding	chr9	57142800	57148305	-	67	22	112	-2.29662
ENSMUSG00000019989	Enpp3	protein_coding	chr10	24772406	24836225	-	67	22	112	-2.29662
ENSMUSG00000048497	Mmgt2	protein_coding	chr11	62648835	62666354	+	164.5	55	274	-2.29593
ENSMUSG00000044317	Gpr4	protein_coding	chr7	19212538	19224174	+	96.5	32	161	-2.29546
ENSMUSG00000113472	CT009757.4	TEC	chr13	63276905	63279224	-	31.5	10	53	-2.29546
ENSMUSG00000050212	Eva1b	protein_coding	chr4	126147744	126149875	+	763.5	258	1269	-2.2938
ENSMUSG00000037605	Adgrl3	protein_coding	chr5	81021202	81796645	+	2439	826	4052	-2.29303
ENSMUSG00000016552	Foxred2	protein_coding	chr15	77940522	77956722	-	28.5	9	48	-2.29278
ENSMUSG00000071042	Rasgrp3	protein_coding	chr17	75435905	75529043	+	13446.5	4558	22335	-2.29258
ENSMUSG00000040549	Ckap5	protein_coding	chr2	91526762	91620664	+	3657.5	1241	6074	-2.29022
ENSMUSG00000049038	Mterf2	protein_coding	chr10	85119433	85128027	-	211	71	351	-2.28951
ENSMUSG00000037736	Limch1	protein_coding	chr5	66745845	67057158	+	2486.5	844	4129	-2.28912
ENSMUSG00000095930	Nim1k	protein_coding	chr13	119710094	119755882	-	175.5	59	292	-2.28787
ENSMUSG00000037355	Uvssa	protein_coding	chr5	33378696	33419754	+	628.5	213	1044	-2.28782
ENSMUSG00000021916	Glt8d1	protein_coding	chr14	31001393	31012441	+	575.5	195	956	-2.28767
ENSMUSG00000029814	Igf2bp3	protein_coding	chr6	49085223	49214957	-	49	16	82	-2.28758
ENSMUSG00000039959	Hip1	protein_coding	chr5	135406531	135545115	-	9632	3276	15988	-2.28663
ENSMUSG00000092051	Gm17229	transcribed_processed_pseudogene	chr10	20515327	20519768	-	22.5	7	38	-2.2854
ENSMUSG00000031433	Rbm41	protein_coding	chrX	139889511	139998595	-	507	172	842	-2.28476
ENSMUSG00000026754	Golga1	protein_coding	chr2	39016155	39065541	-	1419.5	483	2356	-2.28387
ENSMUSG00000040093	Bmf	protein_coding	chr2	118528757	118549687	-	66.5	22	111	-2.28379
ENSMUSG00000032470	Mras	protein_coding	chr9	99385420	99437381	-	368	125	611	-2.28011
ENSMUSG00000050410	Tcf19	protein_coding	chr17	35512734	35516824	-	204	69	339	-2.28011
ENSMUSG00000003355	Fkbp11	protein_coding	chr15	98724373	98728198	-	204	69	339	-2.28011
ENSMUSG00000055866	Per2	protein_coding	chr1	91415982	91459324	-	81	27	135	-2.28011
ENSMUSG00000014932	Yes1	protein_coding	chr5	32611171	32687057	+	2097	716	3478	-2.27863
ENSMUSG00000028702	Rad54l	protein_coding	chr4	116096916	116123685	-	75	25	125	-2.27684
ENSMUSG00000046402	Rbp1	protein_coding	chr9	98422961	98446575	+	37	12	62	-2.27684
ENSMUSG00000071645	Tut1	protein_coding	chr19	8953850	8966207	+	428.5	146	711	-2.27606
ENSMUSG00000034675	Dbn1	protein_coding	chr13	55473429	55488111	-	3267.5	1118	5417	-2.27555
ENSMUSG00000041147	Brca2	protein_coding	chr5	150522630	150569747	+	638.5	218	1059	-2.27506
ENSMUSG00000031465	Angpt2	protein_coding	chr8	18690263	18741562	-	56237.5	19262	93213	-2.27471
ENSMUSG00000003161	Sri	protein_coding	chr5	8046078	8069379	+	3007.5	1030	4985	-2.27384
ENSMUSG00000086918	4930429F24Rik	lincRNA	chr9	79793641	79803235	+	104	35	173	-2.27302
ENSMUSG00000037525	Bcdin3d	protein_coding	chr15	99470084	99474730	-	34	11	57	-2.27302
ENSMUSG00000022015	Tnfsf11	protein_coding	chr14	78277445	78308043	-	16.5	5	28	-2.27302
ENSMUSG00000001175	Calm1	protein_coding	chr12	100199435	100209814	+	61017	20922	101112	-2.27281
ENSMUSG00000020935	Dcakd	protein_coding	chr11	102994047	103017168	-	153.5	52	255	-2.27208
ENSMUSG00000021361	Tmem14c	protein_coding	chr13	41016292	41022586	+	888	304	1472	-2.27188
ENSMUSG00000062960	Kdr	protein_coding	chr5	75932827	75978458	-	16387.5	5625	27150	-2.27082
ENSMUSG00000012076	Brms1l	protein_coding	chr12	55836324	55869736	+	887	304	1470	-2.26992
ENSMUSG00000021990	Spata13	protein_coding	chr14	60634243	60764556	+	1140	391	1889	-2.26946
ENSMUSG00000029092	D5Ertd615e	lincRNA	chr5	45009171	45424402	-	322	110	534	-2.26898
ENSMUSG00000022322	Shcbp1	protein_coding	chr8	4735976	4779554	-	298	102	494	-2.26478
ENSMUSG00000005583	Mef2c	protein_coding	chr13	83504034	83667080	+	2715.5	935	4496	-2.26438
ENSMUSG00000052396	Mogat2	protein_coding	chr7	99219084	99238619	-	86	29	143	-2.26303
ENSMUSG00000021301	Hecw1	protein_coding	chr13	14226438	14523226	-	57	19	95	-2.26303
ENSMUSG00000095567	Noc2l	protein_coding	chr4	156236010	156247616	+	2064.5	712	3417	-2.26118
ENSMUSG00000053286	Trmt1l	protein_coding	chr1	151428542	151458161	+	740.5	255	1226	-2.26092
ENSMUSG00000025785	Exosc7	protein_coding	chr9	123113215	123136129	+	152.5	52	253	-2.26076
ENSMUSG00000034636	Zyg11b	protein_coding	chr4	108229724	108301096	-	3635.5	1256	6015	-2.25882
ENSMUSG00000022159	Rab2b	protein_coding	chr14	52261759	52279545	-	242	83	401	-2.25873
ENSMUSG00000105272	Gm43071	TEC	chr3	106567605	106569636	+	25	8	42	-2.25634
ENSMUSG00000001240	Ramp2	protein_coding	chr11	101246028	101248250	+	1931	668	3194	-2.25574
ENSMUSG00000027435	Cd93	protein_coding	chr2	148436640	148443563	-	16586	5746	27426	-2.25472
ENSMUSG00000022972	1110004E09Rik	protein_coding	chr16	90925809	90934827	-	149	51	247	-2.25376
ENSMUSG00000108179	Gm44274	TEC	chr6	135311456	135311711	-	36.5	12	61	-2.25376
ENSMUSG00000054364	Rhob	protein_coding	chr12	8497661	8500009	-	5005.5	1736	8275	-2.25234
ENSMUSG00000022799	Arhgap31	protein_coding	chr16	38598340	38713274	-	10758.5	3734	17783	-2.2514
ENSMUSG00000052763	Zfp212	protein_coding	chr6	47920476	47932639	+	295.5	102	489	-2.25014
ENSMUSG00000041840	Haus1	protein_coding	chr18	77757567	77767780	-	148.5	51	246	-2.24793
ENSMUSG00000102352	Gm38346	TEC	chr9	32507745	32510383	-	45	15	75	-2.24793
ENSMUSG00000078521	Aunip	protein_coding	chr4	134510999	134523927	+	33.5	11	56	-2.24793
ENSMUSG00000110084	Gm45257	TEC	chr8	102654191	102658188	-	10.5	3	18	-2.24793
ENSMUSG00000108443	Gm44510	TEC	chr7	56012948	56017479	-	10.5	3	18	-2.24793
ENSMUSG00000105460	Gm42671	TEC	chr3	95588971	95590574	+	10.5	3	18	-2.24793
ENSMUSG00000103436	Gm36995	processed_transcript	chrX	7558602	7605381	-	10.5	3	18	-2.24793
ENSMUSG00000092687	Gm25744	snoRNA	chr17	34952013	34952075	-	10.5	3	18	-2.24793
ENSMUSG00000092526	Gm17907	processed_pseudogene	chr7	55902602	55903311	-	10.5	3	18	-2.24793
ENSMUSG00000091580	Gm6467	pseudogene	chr16	21896506	21897116	+	10.5	3	18	-2.24793
ENSMUSG00000090592	Gm17571	protein_coding	chr9	13444034	13446753	-	10.5	3	18	-2.24793
ENSMUSG00000027636	Sla2	protein_coding	chr2	156872457	156887192	-	10.5	3	18	-2.24793
ENSMUSG00000031388	Naa10	protein_coding	chrX	73916873	73921944	-	191.5	66	317	-2.24679
ENSMUSG00000108298	Gm44226	lincRNA	chr6	48754230	48755986	-	188.5	65	312	-2.24562
ENSMUSG00000045629	Sh3tc2	protein_coding	chr18	61953075	62015715	+	412	143	681	-2.2437
ENSMUSG00000026782	Abi2	protein_coding	chr1	60409619	60481158	+	1002.5	349	1656	-2.24315
ENSMUSG00000061410	Zcchc14	protein_coding	chr8	121598703	121652901	-	4692.5	1637	7748	-2.24207
ENSMUSG00000032531	Amotl2	protein_coding	chr9	102716802	102733418	+	5009	1748	8270	-2.24153
ENSMUSG00000003559	As3mt	protein_coding	chr19	46707443	46741095	+	50.5	17	84	-2.23947
ENSMUSG00000040321	Zfp770	protein_coding	chr2	114193461	114201469	-	531	185	877	-2.23892
ENSMUSG00000025086	Trub1	protein_coding	chr19	57452906	57491005	+	253.5	88	419	-2.23851
ENSMUSG00000021377	Dek	protein_coding	chr13	47084782	47106190	-	5411.5	1894	8929	-2.23646
ENSMUSG00000021569	Trip13	protein_coding	chr13	73911347	73937784	-	387	135	639	-2.23447
ENSMUSG00000004018	Fancl	protein_coding	chr11	26386135	26471876	+	96	33	159	-2.23447
ENSMUSG00000006728	Cdk4	protein_coding	chr10	127063534	127067920	+	2123.5	744	3503	-2.23369
ENSMUSG00000090191	9230105E05Rik	antisense_RNA	chr10	120389523	120392793	+	27.5	9	46	-2.23266
ENSMUSG00000021478	Drd1	protein_coding	chr13	54051183	54055705	-	27.5	9	46	-2.23266
ENSMUSG00000021187	Tc2n	protein_coding	chr12	101645443	101718523	-	1244	436	2052	-2.23203
ENSMUSG00000054387	Mdm4	protein_coding	chr1	132959484	133025416	-	950	333	1567	-2.23101
ENSMUSG00000072235	Tuba1a	protein_coding	chr15	98949841	98953551	-	2469	867	4071	-2.22997
ENSMUSG00000032344	Mb21d1	protein_coding	chr9	78430526	78443237	-	201	70	332	-2.22963
ENSMUSG00000067194	Eif1ax	protein_coding	chrX	159372178	159389928	+	2419	850	3988	-2.2288
ENSMUSG00000032649	Colgalt2	protein_coding	chr1	152399830	152510695	+	53	18	88	-2.22781
ENSMUSG00000021719	Rgs7bp	protein_coding	chr13	104945904	105054930	-	61.5	21	102	-2.22707
ENSMUSG00000038379	Ttk	protein_coding	chr9	83834690	83872389	+	399.5	140	659	-2.22677
ENSMUSG00000060216	Arrb2	protein_coding	chr11	70432637	70440828	+	87	30	144	-2.22571
ENSMUSG00000022833	Ccdc14	protein_coding	chr16	34690616	34725194	+	95.5	33	158	-2.22542
ENSMUSG00000016756	Cmah	protein_coding	chr13	24327404	24477377	+	138	48	228	-2.22449
ENSMUSG00000035198	Tubg1	protein_coding	chr11	101119938	101126419	+	1473	519	2427	-2.22318
ENSMUSG00000036023	Parp2	protein_coding	chr14	50807946	50821300	+	393	138	648	-2.22313
ENSMUSG00000058396	Gpr182	protein_coding	chr10	127747276	127751732	-	262.5	92	433	-2.22239
ENSMUSG00000029844	Hoxa1	protein_coding	chr6	52155590	52158317	-	67	23	111	-2.22239
ENSMUSG00000100642	Gm28230	protein_coding	chr2	74726728	74747918	+	16	5	27	-2.22239
ENSMUSG00000114612	AC129085.3	TEC	chr13	98732986	98734690	+	7.5	2	13	-2.22239
ENSMUSG00000104239	Gm37588	TEC	chr1	128132157	128134652	+	7.5	2	13	-2.22239
ENSMUSG00000098111	Gm4654	processed_pseudogene	chr14	103370465	103371446	-	7.5	2	13	-2.22239
ENSMUSG00000095403	Gm21092	unprocessed_pseudogene	chr8	20567597	20582771	+	7.5	2	13	-2.22239
ENSMUSG00000086134	Gm16159	antisense_RNA	chr8	25548661	25556083	-	7.5	2	13	-2.22239
ENSMUSG00000081480	Gm13608	processed_pseudogene	chr2	31985059	31986464	+	7.5	2	13	-2.22239
ENSMUSG00000067356	B430203G13Rik	TEC	chr12	17924294	17925668	+	7.5	2	13	-2.22239
ENSMUSG00000063458	Lrmda	protein_coding	chr14	22019712	23056085	+	7.5	2	13	-2.22239
ENSMUSG00000051736	Fam229b	protein_coding	chr10	39118804	39133914	-	7.5	2	13	-2.22239
ENSMUSG00000059013	Sh2d3c	protein_coding	chr2	32721055	32755512	+	925	326	1524	-2.22145
ENSMUSG00000027953	Slc50a1	protein_coding	chr3	89268246	89270570	-	333	117	549	-2.22064
ENSMUSG00000031379	Pir	protein_coding	chrX	164269431	164373011	+	149	52	246	-2.22045
ENSMUSG00000079038	D130040H23Rik	protein_coding	chr8	69271080	69303375	+	132	46	218	-2.2202
ENSMUSG00000040732	Erg	protein_coding	chr16	95359169	95586593	-	7324.5	2590	12059	-2.21865
ENSMUSG00000004043	Stat5a	protein_coding	chr11	100859351	100885169	+	55.5	19	92	-2.21723
ENSMUSG00000029178	Klf3	protein_coding	chr5	64803388	64832901	+	3462	1225	5699	-2.217
ENSMUSG00000030421	Uri1	protein_coding	chr7	37959992	38019542	-	2068	732	3404	-2.21577
ENSMUSG00000049764	Zfp280b	protein_coding	chr10	76032654	76043234	+	498.5	176	821	-2.21539
ENSMUSG00000002365	Snx9	protein_coding	chr17	5841328	5931033	+	5363	1900	8826	-2.21516
ENSMUSG00000005897	Nr2c1	protein_coding	chr10	94148023	94197211	+	326	115	537	-2.21348
ENSMUSG00000042712	Tceal9	protein_coding	chrX	136245079	136247139	+	11579.5	4108	19051	-2.21308
ENSMUSG00000031158	Timm17b	protein_coding	chrX	7899357	7908351	+	114.5	40	189	-2.2123
ENSMUSG00000072621	Slfn10-ps	transcribed_unprocessed_pseudogene	chr11	83028130	83040042	-	697.5	247	1148	-2.21197
ENSMUSG00000018965	Ywhah	protein_coding	chr5	33018816	33027966	+	5582	1984	9180	-2.20951
ENSMUSG00000029428	Stx2	protein_coding	chr5	128984557	129008574	-	3548	1261	5835	-2.20927
ENSMUSG00000046822	Slc39a3	protein_coding	chr10	81028538	81037426	-	249	88	410	-2.20726
ENSMUSG00000029126	Nsg1	protein_coding	chr5	38137192	38159907	-	987.5	351	1624	-2.20679
ENSMUSG00000029735	Tpk1	protein_coding	chr6	43345001	43666278	-	122.5	43	202	-2.2059
ENSMUSG00000028426	Rad23b	protein_coding	chr4	55350043	55392237	+	4974.5	1772	8177	-2.20556
ENSMUSG00000052949	Rnf157	protein_coding	chr11	116336353	116413004	-	462	164	760	-2.20543
ENSMUSG00000013833	Med16	protein_coding	chr10	79894708	79908921	-	473	168	778	-2.2046
ENSMUSG00000063687	Pcdhb5	protein_coding	chr18	37320381	37323915	+	142	50	234	-2.20409
ENSMUSG00000110744	AC125532.1	processed_pseudogene	chr10	30780857	30782271	-	13	4	22	-2.20163
ENSMUSG00000015599	Ttbk1	protein_coding	chr17	46442448	46487675	-	13	4	22	-2.20163
ENSMUSG00000049929	Lpar4	protein_coding	chrX	106920625	106933900	+	144.5	51	238	-2.20043
ENSMUSG00000031700	Gpt2	protein_coding	chr8	85492576	85527560	+	292.5	104	481	-2.19864
ENSMUSG00000026622	Nek2	protein_coding	chr1	191821444	191833050	+	231	82	380	-2.19861
ENSMUSG00000027221	Chst1	protein_coding	chr2	92599707	92615250	+	2265.5	810	3721	-2.1983
ENSMUSG00000042842	Serpinb6b	protein_coding	chr13	32965209	32979067	+	2724	975	4473	-2.19661
ENSMUSG00000097792	Gm27042	lincRNA	chr19	40589435	40594862	+	66	23	109	-2.1964
ENSMUSG00000030123	Plxnd1	protein_coding	chr6	115954811	115995005	-	12408	4449	20367	-2.19443
ENSMUSG00000100158	Gm28119	sense_intronic	chr9	41581908	41582283	+	71.5	25	118	-2.19438
ENSMUSG00000025227	Mfsd13a	protein_coding	chr19	46341121	46375252	+	18.5	6	31	-2.19265
ENSMUSG00000022407	Adsl	protein_coding	chr15	80948490	80970947	+	1071	384	1758	-2.19183
ENSMUSG00000031253	Srpx2	protein_coding	chrX	133908426	133932446	+	5901.5	2120	9683	-2.19086
ENSMUSG00000062937	Mtap	protein_coding	chr4	89137122	89181081	+	4124.5	1482	6767	-2.19021
ENSMUSG00000070348	Ccnd1	protein_coding	chr7	144929931	144939869	-	22748.5	8179	37318	-2.18974
ENSMUSG00000030725	Lipt2	protein_coding	chr7	100159277	100161365	+	188	67	309	-2.18866
ENSMUSG00000034974	Dapk3	protein_coding	chr10	81183005	81193197	+	591	212	970	-2.18862
ENSMUSG00000025787	Tgm4	protein_coding	chr9	123034726	123067561	+	99	35	163	-2.18763
ENSMUSG00000107481	4833403J16Rik	lincRNA	chr6	48755338	48756368	+	24	8	40	-2.18763
ENSMUSG00000049521	Cdc42ep1	protein_coding	chr15	78842647	78850902	+	642.5	231	1054	-2.18505
ENSMUSG00000025935	Tram1	protein_coding	chr1	13564698	13589910	-	4501	1623	7379	-2.18407
ENSMUSG00000020018	Snrpf	protein_coding	chr10	93583029	93589706	-	112.5	40	185	-2.18161
ENSMUSG00000053329	D10Jhu81e	protein_coding	chr10	78162066	78169782	-	242.5	87	398	-2.18081
ENSMUSG00000072980	Oip5	protein_coding	chr2	119609971	119618469	-	51.5	18	85	-2.17834
ENSMUSG00000032096	Arcn1	protein_coding	chr9	44741564	44767845	-	7822.5	2831	12814	-2.17794
ENSMUSG00000031393	Mecp2	protein_coding	chrX	74026592	74135363	-	1435.5	519	2352	-2.17792
ENSMUSG00000030663	1110004F10Rik	protein_coding	chr7	116093301	116105210	+	1253	453	2053	-2.17767
ENSMUSG00000036932	Aifm1	protein_coding	chrX	48474944	48513563	-	979.5	354	1605	-2.17758
ENSMUSG00000055240	Zfp101	protein_coding	chr17	33380179	33394641	-	275	99	451	-2.17632
ENSMUSG00000025979	Mob4	protein_coding	chr1	55131231	55154899	+	1773	642	2904	-2.17565
ENSMUSG00000030403	Vasp	protein_coding	chr7	19256929	19271817	-	2168	786	3550	-2.17379
ENSMUSG00000021993	Mipep	protein_coding	chr14	60784573	60904229	+	409.5	148	671	-2.17315
ENSMUSG00000042167	Papd4	protein_coding	chr13	93146282	93192385	-	841	305	1377	-2.17097
ENSMUSG00000032463	Faim	protein_coding	chr9	98986373	99002021	+	345.5	125	566	-2.16993
ENSMUSG00000035413	Tmem98	protein_coding	chr11	80810175	80822033	+	241	87	395	-2.16993
ENSMUSG00000030346	Rad51ap1	protein_coding	chr6	126923050	126939587	-	158.5	57	260	-2.16993
ENSMUSG00000051147	Nat2	protein_coding	chr8	67494858	67502584	+	54	19	89	-2.16993
ENSMUSG00000102494	Gm36988	sense_intronic	chr2	4316479	4318886	+	32	11	53	-2.16993
ENSMUSG00000054537	Tmprss11e	protein_coding	chr5	86705186	86745815	-	26.5	9	44	-2.16993
ENSMUSG00000029149	Krtcap3	protein_coding	chr5	31251706	31253202	+	21	7	35	-2.16993
ENSMUSG00000045327	6330549D23Rik	transcribed_processed_pseudogene	chr3	96606659	96629820	-	15.5	5	26	-2.16993
ENSMUSG00000105224	Gm3364	sense_intronic	chr5	44700876	44706890	-	10	3	17	-2.16993
ENSMUSG00000051455	Meioc	protein_coding	chr11	102665588	102682237	+	10	3	17	-2.16993
ENSMUSG00000020926	Adam11	protein_coding	chr11	102761439	102780262	+	10	3	17	-2.16993
ENSMUSG00000110905	AC107851.1	lincRNA	chr9	115680743	115682263	+	4.5	1	8	-2.16993
ENSMUSG00000110007	Gm45352	antisense_RNA	chr19	50147014	50169777	+	4.5	1	8	-2.16993
ENSMUSG00000109936	Gm45889	lincRNA	chr7	142283210	142290418	+	4.5	1	8	-2.16993
ENSMUSG00000106676	Gm42895	TEC	chr6	33039124	33042119	-	4.5	1	8	-2.16993
ENSMUSG00000105586	Gm43009	TEC	chr3	126644461	126648026	+	4.5	1	8	-2.16993
ENSMUSG00000104398	Gm37964	TEC	chr2	67898596	67903500	+	4.5	1	8	-2.16993
ENSMUSG00000103548	Gm37670	processed_pseudogene	chr1	34969627	34969855	-	4.5	1	8	-2.16993
ENSMUSG00000102474	2610012C04Rik	TEC	chr1	135480392	135481414	-	4.5	1	8	-2.16993
ENSMUSG00000099655	2310034G01Rik	protein_coding	chr19	46348201	46350302	-	4.5	1	8	-2.16993
ENSMUSG00000099394	Gm9142	processed_pseudogene	chr7	32358928	32359882	+	4.5	1	8	-2.16993
ENSMUSG00000098888	Gm18486	processed_pseudogene	chr9	76869186	76869483	-	4.5	1	8	-2.16993
ENSMUSG00000098403	Gm27415	miRNA	chr16	31261505	31261599	+	4.5	1	8	-2.16993
ENSMUSG00000098138	Gm9081	processed_pseudogene	chr10	122169373	122170363	+	4.5	1	8	-2.16993
ENSMUSG00000097935	Gm3809	processed_pseudogene	chr1	186960508	186961513	+	4.5	1	8	-2.16993
ENSMUSG00000093147	Gm23369	snRNA	chr2	32593469	32593573	-	4.5	1	8	-2.16993
ENSMUSG00000087963	Gm25394	snoRNA	chr13	49684301	49684433	+	4.5	1	8	-2.16993
ENSMUSG00000085787	Gm13092	processed_pseudogene	chr4	150315177	150315436	-	4.5	1	8	-2.16993
ENSMUSG00000084876	Gm14965	processed_transcript	chr19	6409400	6418606	-	4.5	1	8	-2.16993
ENSMUSG00000084154	Gm15644	processed_pseudogene	chr6	67012485	67012871	+	4.5	1	8	-2.16993
ENSMUSG00000082684	Gm12774	processed_pseudogene	chr7	34383659	34384074	+	4.5	1	8	-2.16993
ENSMUSG00000079140	Gm6374	processed_pseudogene	chr1	83314513	83315300	+	4.5	1	8	-2.16993
ENSMUSG00000078872	Gm14401	protein_coding	chr2	177074320	177087034	+	4.5	1	8	-2.16993
ENSMUSG00000077349	Gm24867	snRNA	chr17	13675376	13675482	+	4.5	1	8	-2.16993
ENSMUSG00000051506	Wdfy4	protein_coding	chr14	32959547	33185066	-	4.5	1	8	-2.16993
ENSMUSG00000036437	Npy1r	protein_coding	chr8	66697192	66706792	+	4.5	1	8	-2.16993
ENSMUSG00000032878	Ccdc85a	protein_coding	chr11	28385685	28584324	-	4.5	1	8	-2.16993
ENSMUSG00000030653	Gm45837	protein_coding	chr7	101410886	101512819	+	4.5	1	8	-2.16993
ENSMUSG00000029553	Tfec	protein_coding	chr6	16833373	16898441	-	4.5	1	8	-2.16993
ENSMUSG00000035649	Zcchc7	protein_coding	chr4	44756568	44932215	+	994	361	1627	-2.16904
ENSMUSG00000038005	Hpf1	protein_coding	chr8	60890418	60907580	+	991	360	1622	-2.16859
ENSMUSG00000027200	Sema6d	protein_coding	chr2	124089969	124667770	+	2172.5	790	3555	-2.16851
ENSMUSG00000028032	Papss1	protein_coding	chr3	131564768	131643671	+	856	311	1401	-2.16787
ENSMUSG00000039740	Alg2	protein_coding	chr4	47469833	47474333	-	910.5	331	1490	-2.16703
ENSMUSG00000050069	Grem2	protein_coding	chr1	174833785	174921819	-	224	81	367	-2.16601
ENSMUSG00000031592	Pcm1	protein_coding	chr8	41239773	41332344	+	5429	1978	8880	-2.16595
ENSMUSG00000017491	Rarb	protein_coding	chr14	16430839	16575827	-	202	73	331	-2.16559
ENSMUSG00000000148	Brat1	protein_coding	chr5	140705011	140719379	+	292.5	106	479	-2.16542
ENSMUSG00000020362	Cnot6	protein_coding	chr11	49671503	49712723	-	6287.5	2292	10283	-2.16509
ENSMUSG00000028675	Pnrc2	protein_coding	chr4	135870918	135873850	-	3026.5	1103	4950	-2.16498
ENSMUSG00000039831	Arhgap29	protein_coding	chr3	121953229	122016753	+	26855.5	9801	43910	-2.16343
ENSMUSG00000070639	Lrrc8b	protein_coding	chr5	105415775	105490074	+	834	304	1364	-2.16202
ENSMUSG00000021760	Gpx8	protein_coding	chr13	113042759	113046386	-	1400.5	511	2290	-2.16176
ENSMUSG00000078771	Evi2a	protein_coding	chr11	79526560	79530609	-	51	18	84	-2.16146
ENSMUSG00000097707	Gm26742	lincRNA	chr18	54981435	54987689	+	45.5	16	75	-2.16046
ENSMUSG00000025076	Casp7	protein_coding	chr19	56397129	56442344	+	1031.5	377	1686	-2.158
ENSMUSG00000104435	Gm37422	antisense_RNA	chr1	189879935	189884652	+	141	51	231	-2.15754
ENSMUSG00000014980	Tsen15	protein_coding	chr1	152370735	152386682	-	195.5	71	320	-2.1565
ENSMUSG00000095550	Gm21671	protein_coding	chr5	25948253	25954417	-	29	10	48	-2.15528
ENSMUSG00000029004	Kmt2e	protein_coding	chr5	23434441	23504235	+	4875	1787	7963	-2.15515
ENSMUSG00000024986	Hhex	protein_coding	chr19	37434810	37440731	+	4117	1510	6724	-2.15403
ENSMUSG00000089774	Slc5a3	protein_coding	chr16	92058322	92087473	+	8785.5	3224	14347	-2.15348
ENSMUSG00000038286	Bphl	protein_coding	chr13	34037597	34074074	+	102.5	37	168	-2.15295
ENSMUSG00000087143	A830082K12Rik	antisense_RNA	chr13	78202374	78279391	+	222	81	363	-2.15024
ENSMUSG00000030850	Ate1	protein_coding	chr7	130391493	130520369	-	2285.5	841	3730	-2.14767
ENSMUSG00000048416	Mlf1	protein_coding	chr3	67374097	67400003	+	37	13	61	-2.14684
ENSMUSG00000039275	Foxk2	protein_coding	chr11	121259990	121309896	+	2605.5	960	4251	-2.14553
ENSMUSG00000059689	Zfp637	protein_coding	chr6	117841180	117845956	+	191.5	70	313	-2.14487
ENSMUSG00000053985	Zfp14	protein_coding	chr7	30036359	30051380	-	83	30	136	-2.14384
ENSMUSG00000001999	Blvra	protein_coding	chr2	127070667	127097084	+	226.5	83	370	-2.14296
ENSMUSG00000074158	Zfp976	protein_coding	chr7	42612504	42642547	-	156	57	255	-2.14202
ENSMUSG00000016984	Etaa1	protein_coding	chr11	17938756	17953875	-	770	284	1256	-2.14095
ENSMUSG00000025403	Shmt2	protein_coding	chr10	127517123	127522444	-	983.5	363	1604	-2.14056
ENSMUSG00000039254	Pomt1	protein_coding	chr2	32236590	32255005	+	339.5	125	554	-2.13906
ENSMUSG00000108319	Gm44552	TEC	chr7	73498002	73499248	-	12.5	4	21	-2.1375
ENSMUSG00000106664	Gm17936	processed_pseudogene	chr5	8912971	8913958	+	12.5	4	21	-2.1375
ENSMUSG00000096945	Gm26546	lincRNA	chr10	88379244	88383711	-	12.5	4	21	-2.1375
ENSMUSG00000066807	Gm10179	processed_pseudogene	chr7	12085925	12086612	-	12.5	4	21	-2.1375
ENSMUSG00000065041	Gm24044	snoRNA	chr9	120128780	120128935	+	12.5	4	21	-2.1375
ENSMUSG00000034793	G6pc3	protein_coding	chr11	102189620	102194081	+	271.5	100	443	-2.1362
ENSMUSG00000079852	Klra4	protein_coding	chr6	130043731	130067271	-	115	42	188	-2.13598
ENSMUSG00000060477	Irak2	protein_coding	chr6	113638467	113695026	+	266	98	434	-2.13551
ENSMUSG00000057604	Lmcd1	protein_coding	chr6	112273758	112330425	+	303.5	112	495	-2.13402
ENSMUSG00000062510	Nsl1	protein_coding	chr1	191063024	191086474	+	131	48	214	-2.13348
ENSMUSG00000029752	Asns	protein_coding	chr6	7675169	7693254	-	1620.5	601	2640	-2.13325
ENSMUSG00000052544	St6galnac3	protein_coding	chr3	153198266	153725174	-	656	243	1069	-2.13266
ENSMUSG00000071172	Srsf3	protein_coding	chr17	29032673	29043366	+	1027.5	381	1674	-2.13252
ENSMUSG00000025626	Phf6	protein_coding	chrX	52912266	52956943	+	2447.5	910	3985	-2.12942
ENSMUSG00000051499	Zfp786	protein_coding	chr6	47819266	47830867	-	20.5	7	34	-2.12928
ENSMUSG00000021619	Atg10	protein_coding	chr13	90935356	91223968	-	71.5	26	117	-2.12776
ENSMUSG00000022816	Fstl1	protein_coding	chr16	37776873	37836514	+	20796.5	7746	33847	-2.12736
ENSMUSG00000049672	Zbtb14	protein_coding	chr17	69383050	69390750	+	388	144	632	-2.12615
ENSMUSG00000029570	Lfng	protein_coding	chr5	140607320	140615545	+	465	173	757	-2.12311
ENSMUSG00000012443	Kif11	protein_coding	chr19	37376403	37421859	+	1520	567	2473	-2.12288
ENSMUSG00000027478	Dnmt3b	protein_coding	chr2	153649450	153687730	+	82	30	134	-2.12262
ENSMUSG00000020167	Tcf3	protein_coding	chr10	80409514	80433647	-	2583	965	4201	-2.12098
ENSMUSG00000023150	Ivns1abp	protein_coding	chr1	151344477	151364422	+	20994	7856	34132	-2.11912
ENSMUSG00000039509	Nup133	protein_coding	chr8	123897123	123949265	-	517	193	841	-2.11776
ENSMUSG00000034485	Uaca	protein_coding	chr9	60794542	60880370	+	3808.5	1426	6191	-2.11742
ENSMUSG00000057147	Dph6	protein_coding	chr2	114516416	114654964	-	1204.5	451	1958	-2.11572
ENSMUSG00000030587	2200002D01Rik	protein_coding	chr7	29246561	29248466	-	95	35	155	-2.11548
ENSMUSG00000031901	Dus2	protein_coding	chr8	106011507	106053819	+	87	32	142	-2.11548
ENSMUSG00000106867	Gm43800	TEC	chr6	31288963	31291693	+	23	8	38	-2.11548
ENSMUSG00000084894	Gm13834	lincRNA	chr6	31087609	31087912	-	23	8	38	-2.11548
ENSMUSG00000043801	Oaz1-ps	pseudogene	chr17	17345456	17346140	-	15	5	25	-2.11548
ENSMUSG00000113423	AC132954.2	processed_pseudogene	chr12	83875115	83875882	-	7	2	12	-2.11548
ENSMUSG00000108314	Prkcz2	processed_pseudogene	chr7	27882755	27884510	-	7	2	12	-2.11548
ENSMUSG00000107969	Gm44085	antisense_RNA	chr6	146992367	146994024	-	7	2	12	-2.11548
ENSMUSG00000100764	Gm29155	antisense_RNA	chr1	43741961	43743895	-	7	2	12	-2.11548
ENSMUSG00000098180	Gm5430	processed_pseudogene	chr17	25326612	25327526	-	7	2	12	-2.11548
ENSMUSG00000097524	Gm26846	lincRNA	chr9	102345903	102354694	+	7	2	12	-2.11548
ENSMUSG00000089883	Gm3355	processed_pseudogene	chr17	13862317	13862803	-	7	2	12	-2.11548
ENSMUSG00000089870	Gm15562	sense_intronic	chr14	46961440	46965684	+	7	2	12	-2.11548
ENSMUSG00000080574	Mir466i	miRNA	chr13	17747473	17747593	+	7	2	12	-2.11548
ENSMUSG00000078503	Zfp990	protein_coding	chr4	145510759	145539188	+	7	2	12	-2.11548
ENSMUSG00000063754	Gm10136	processed_pseudogene	chr19	29003408	29003842	-	7	2	12	-2.11548
ENSMUSG00000050105	Grrp1	protein_coding	chr4	134251110	134254106	-	7	2	12	-2.11548
ENSMUSG00000026283	Ing5	protein_coding	chr1	93803965	93822095	+	700	262	1138	-2.11463
ENSMUSG00000052727	Map1b	protein_coding	chr13	99421446	99516540	-	7812.5	2931	12694	-2.1143
ENSMUSG00000049960	Mrps16	protein_coding	chr14	20389304	20393634	-	190.5	71	310	-2.11085
ENSMUSG00000038244	Mical2	protein_coding	chr7	112225856	112355194	+	11135.5	4188	18083	-2.11004
ENSMUSG00000053477	Tcf4	protein_coding	chr18	69344146	69689079	+	19410	7304	31516	-2.10917
ENSMUSG00000110730	AC118476.2	lincRNA	chr9	120861615	120866756	-	365.5	137	594	-2.10822
ENSMUSG00000081272	Gm13509	processed_pseudogene	chr2	49308155	49309462	+	129	48	210	-2.10639
ENSMUSG00000030393	Zik1	protein_coding	chr7	10487229	10495394	-	208.5	78	339	-2.10561
ENSMUSG00000034321	Exosc1	protein_coding	chr19	41922980	41933314	-	428.5	161	696	-2.10516
ENSMUSG00000032966	Fkbp1a	protein_coding	chr2	151542483	151561692	+	10557.5	3983	17132	-2.10449
ENSMUSG00000025266	Gnl3l	protein_coding	chrX	150983141	151017322	-	3325	1254	5396	-2.10447
ENSMUSG00000027326	Knl1	protein_coding	chr2	119047119	119105501	+	900	339	1461	-2.10434
ENSMUSG00000018340	Anxa6	protein_coding	chr11	54979108	55033445	-	1930.5	728	3133	-2.10401
ENSMUSG00000032235	Ice2	protein_coding	chr9	69397906	69433122	+	499.5	188	811	-2.10309
ENSMUSG00000021306	Gpr137b	protein_coding	chr13	13357620	13393624	-	1095	413	1777	-2.10255
ENSMUSG00000023919	Cenpq	protein_coding	chr17	40923051	40935047	-	298	112	484	-2.10166
ENSMUSG00000001576	Ergic1	protein_coding	chr17	26561489	26656931	+	3253	1229	5277	-2.10133
ENSMUSG00000049107	Ntf3	protein_coding	chr6	126101412	126166910	-	36	13	59	-2.09954
ENSMUSG00000069274	Hist1h4f	protein_coding	chr13	23551258	23551648	-	17.5	6	29	-2.09954
ENSMUSG00000045689	Pcdhb4	protein_coding	chr18	37307455	37311172	+	17.5	6	29	-2.09954
ENSMUSG00000029108	Pcdh7	protein_coding	chr5	57717967	58133230	+	9107.5	3447	14768	-2.09874
ENSMUSG00000027993	Trim2	protein_coding	chr3	84160439	84304809	-	1852	701	3003	-2.09734
ENSMUSG00000021928	Ebpl	protein_coding	chr14	61331742	61360439	-	104.5	39	170	-2.09592
ENSMUSG00000060397	Zfp128	protein_coding	chr7	12881177	12893422	+	191.5	72	311	-2.09558
ENSMUSG00000073119	Speer4a	protein_coding	chr5	26032846	26039558	-	57	21	93	-2.09516
ENSMUSG00000049230	Gm9833	protein_coding	chr3	10088110	10092565	+	38.5	14	63	-2.09311
ENSMUSG00000041859	Mcm3	protein_coding	chr1	20802968	20820312	-	1478.5	561	2396	-2.09259
ENSMUSG00000026276	Sept2	protein_coding	chr1	93478964	93510260	+	49	18	80	-2.09192
ENSMUSG00000041353	Tmem29	protein_coding	chrX	150397773	150459150	-	209.5	79	340	-2.0917
ENSMUSG00000046380	Jrk	protein_coding	chr15	74702301	74709535	-	159.5	60	259	-2.09163
ENSMUSG00000066613	Zfp932	protein_coding	chr5	109996521	110010411	+	109.5	41	178	-2.0915
ENSMUSG00000035704	Alg8	protein_coding	chr7	97371606	97392185	+	170	64	276	-2.09137
ENSMUSG00000091183	Gm5141	protein_coding	chr13	62772200	62785808	-	172.5	65	280	-2.09003
ENSMUSG00000016487	Ppfibp1	protein_coding	chr6	146888487	147032025	+	15548	5915	25181	-2.0897
ENSMUSG00000078670	Fam174b	protein_coding	chr7	73740302	73776919	+	9583.5	3646	15521	-2.08953
ENSMUSG00000022747	St3gal6	protein_coding	chr16	58468125	58524243	-	2175.5	828	3523	-2.08777
ENSMUSG00000027331	Knstrn	protein_coding	chr2	118814003	118837696	+	251	95	407	-2.08746
ENSMUSG00000112932	AC139754.4	TEC	chr10	88088198	88089824	+	9.5	3	16	-2.08746
ENSMUSG00000110874	AC121988.1	lincRNA	chr10	45807562	45852283	+	9.5	3	16	-2.08746
ENSMUSG00000098022	Zfp82	protein_coding	chr7	30056037	30072900	-	9.5	3	16	-2.08746
ENSMUSG00000031224	Magee2	protein_coding	chrX	104854952	104857267	-	9.5	3	16	-2.08746
ENSMUSG00000006782	Cnp	protein_coding	chr11	100574904	100581728	+	621	236	1006	-2.0871
ENSMUSG00000024170	Telo2	protein_coding	chr17	25099570	25115967	-	285	108	462	-2.08668
ENSMUSG00000053774	Ubxn7	protein_coding	chr16	32332252	32393747	+	3485.5	1328	5643	-2.08638
ENSMUSG00000025786	Zdhhc3	protein_coding	chr9	123072310	123113205	-	1029	392	1666	-2.08465
ENSMUSG00000087142	Gm12454	antisense_RNA	chr4	43505657	43508747	-	75	28	122	-2.08453
ENSMUSG00000022516	Nudt16l1	protein_coding	chr16	4939111	4941020	+	130	49	211	-2.08406
ENSMUSG00000089917	Uckl1	protein_coding	chr2	181569149	181582008	-	381	145	617	-2.08164
ENSMUSG00000029765	Plxna4	protein_coding	chr6	32144268	32588192	-	6290.5	2406	10175	-2.07986
ENSMUSG00000038371	Sbf2	protein_coding	chr7	110308013	110614922	-	2507	960	4054	-2.07709
ENSMUSG00000033114	Slc35d2	protein_coding	chr13	64096308	64129368	-	179	68	290	-2.07635
ENSMUSG00000026662	Sephs1	protein_coding	chr2	4881564	4910557	+	987.5	378	1597	-2.076
ENSMUSG00000020484	Xbp1	protein_coding	chr11	5520659	5525893	+	1496	573	2419	-2.07588
ENSMUSG00000042406	Atf4	protein_coding	chr15	80255184	80257540	+	3464	1329	5599	-2.074
ENSMUSG00000025154	Arhgap19	protein_coding	chr19	41766588	41802084	-	199.5	76	323	-2.07306
ENSMUSG00000042590	Ipo11	protein_coding	chr13	106794439	106936958	-	2237	859	3615	-2.07199
ENSMUSG00000108614	2610306O10Rik	TEC	chr7	128538932	128539543	+	64	24	104	-2.07039
ENSMUSG00000105905	Gm7709	processed_pseudogene	chr5	88062516	88064373	+	12	4	20	-2.07039
ENSMUSG00000095762	Gm16378	processed_pseudogene	chr8	122841731	122842072	+	12	4	20	-2.07039
ENSMUSG00000093645	Gm23187	snoRNA	chr2	130277195	130277280	+	12	4	20	-2.07039
ENSMUSG00000088208	Gm23751	scaRNA	chr6	125121724	125121859	+	12	4	20	-2.07039
ENSMUSG00000081978	Gm14895	processed_pseudogene	chrX	114490420	114491780	+	12	4	20	-2.07039
ENSMUSG00000072620	Slfn2	protein_coding	chr11	83065112	83070678	+	593.5	228	959	-2.06769
ENSMUSG00000002103	Acp2	protein_coding	chr2	91202909	91214098	+	1094.5	421	1768	-2.06762
ENSMUSG00000073678	Pgap1	protein_coding	chr1	54472994	54557682	-	367.5	141	594	-2.067
ENSMUSG00000097861	Gm26858	lincRNA	chr17	32369305	32378445	+	69	26	112	-2.06529
ENSMUSG00000022150	Dab2	protein_coding	chr15	6386748	6440705	+	12896	4976	20816	-2.06441
ENSMUSG00000006715	Gmnn	protein_coding	chr13	24751845	24761923	-	84.5	32	137	-2.06413
ENSMUSG00000103151	Gm38292	TEC	chr9	32477333	32480377	-	27.5	10	45	-2.06413
ENSMUSG00000028145	Them4	protein_coding	chr3	94310089	94332540	+	201	77	325	-2.06333
ENSMUSG00000050552	Lamtor4	protein_coding	chr5	138255482	138259395	+	118	45	191	-2.0614
ENSMUSG00000079109	Pms2	protein_coding	chr5	143909964	143933968	+	464.5	179	750	-2.06082
ENSMUSG00000103839	Gm37607	TEC	chr1	58383512	58386134	-	120.5	46	195	-2.06012
ENSMUSG00000042323	Pbrm1	protein_coding	chr14	31019138	31121592	+	9191.5	3560	14823	-2.05758
ENSMUSG00000030208	Emp1	protein_coding	chr6	135362545	135383173	+	26875.5	10413	43338	-2.05714
ENSMUSG00000029401	Rilpl2	protein_coding	chr5	124463265	124478366	-	337	130	544	-2.05669
ENSMUSG00000071708	Sms	protein_coding	chrX	157443855	157492287	-	484	187	781	-2.05644
ENSMUSG00000005732	Ranbp1	protein_coding	chr16	18239784	18248732	-	1652	640	2664	-2.05574
ENSMUSG00000021025	Nfkbia	protein_coding	chr12	55489410	55492647	-	1228.5	476	1981	-2.0549
ENSMUSG00000026207	Speg	protein_coding	chr1	75375297	75432320	+	32.5	12	53	-2.05445
ENSMUSG00000022364	Tbc1d31	protein_coding	chr15	57912199	57970061	+	305.5	118	493	-2.05355
ENSMUSG00000021215	Net1	protein_coding	chr13	3882018	3918220	-	1969	764	3174	-2.05322
ENSMUSG00000114172	CT030240.1	processed_pseudogene	chr13	62639886	62643252	-	120	46	194	-2.05274
ENSMUSG00000040521	Tsfm	protein_coding	chr10	127011572	127030840	-	192	74	310	-2.05195
ENSMUSG00000020392	Cdkn2aipnl	protein_coding	chr11	51967661	51977334	+	665	258	1072	-2.05063
ENSMUSG00000084497	Gm22107	snRNA	chr15	77840657	77840756	-	17	6	28	-2.05063
ENSMUSG00000058290	Espl1	protein_coding	chr15	102296293	102324356	+	150.5	58	243	-2.04809
ENSMUSG00000031004	Mki67	protein_coding	chr7	135689784	135716361	-	4375.5	1704	7047	-2.04744
ENSMUSG00000037373	Ctbp1	protein_coding	chr5	33247723	33274994	-	2691	1048	4334	-2.04702
ENSMUSG00000039640	Mrpl12	protein_coding	chr11	120484613	120489065	+	373.5	145	602	-2.04619
ENSMUSG00000066637	Ttc32	protein_coding	chr12	9029997	9041988	+	99	38	160	-2.04551
ENSMUSG00000060206	Zfp462	protein_coding	chr4	54947976	55083563	+	2005.5	782	3229	-2.04445
ENSMUSG00000031551	Ido1	protein_coding	chr8	24584136	24597009	-	19.5	7	32	-2.04439
ENSMUSG00000001524	Gtf2h4	protein_coding	chr17	35667730	35673739	-	206.5	80	333	-2.04385
ENSMUSG00000019132	BC005537	protein_coding	chr13	24801657	24816197	+	7800.5	3046	12555	-2.04292
ENSMUSG00000031299	Pdha1	protein_coding	chrX	160122209	160138413	-	2661.5	1039	4284	-2.04271
ENSMUSG00000029776	Hibadh	protein_coding	chr6	52546228	52640389	-	779.5	304	1255	-2.04196
ENSMUSG00000051124	Gimap9	protein_coding	chr6	48676129	48678699	+	672	262	1082	-2.0419
ENSMUSG00000042548	Asxl1	protein_coding	chr2	153345845	153404007	+	1474	576	2372	-2.04007
ENSMUSG00000026126	Ptpn18	protein_coding	chr1	34459765	34475733	+	68	26	110	-2.03953
ENSMUSG00000096965	3300005D01Rik	lincRNA	chr17	5799491	5803240	+	374.5	146	603	-2.03873
ENSMUSG00000033032	Afap1l1	protein_coding	chr18	61730261	61786702	-	2302	901	3703	-2.03788
ENSMUSG00000019214	Chtf18	protein_coding	chr17	25718926	25727419	-	124	48	200	-2.03634
ENSMUSG00000020780	Srp68	protein_coding	chr11	116245166	116274217	-	1125.5	441	1810	-2.03467
ENSMUSG00000006403	Adamts4	protein_coding	chr1	171250421	171260637	+	761	298	1224	-2.03456
ENSMUSG00000048106	4632415L05Rik	lincRNA	chr3	19894898	19898984	+	343	134	552	-2.03432
ENSMUSG00000031785	Adgrg1	protein_coding	chr8	94977107	95014217	+	1374.5	539	2210	-2.03367
ENSMUSG00000028102	Pex11b	protein_coding	chr3	96635430	96645366	+	134	52	216	-2.03363
ENSMUSG00000103780	Gm37524	TEC	chr1	168335980	168337671	-	27	10	44	-2.03242
ENSMUSG00000038122	Tbc1d32	protein_coding	chr10	56014293	56228689	-	541	212	870	-2.03182
ENSMUSG00000029208	Guf1	protein_coding	chr5	69556961	69573104	+	487.5	191	784	-2.03159
ENSMUSG00000100005	B130024G19Rik	processed_transcript	chr7	70386493	70489972	+	57.5	22	93	-2.03103
ENSMUSG00000030127	Cops7a	protein_coding	chr6	124958413	124965538	-	3468	1363	5573	-2.03087
ENSMUSG00000037580	Gch1	protein_coding	chr14	47153895	47189413	-	235.5	92	379	-2.0307
ENSMUSG00000026172	Bcs1l	protein_coding	chr1	74588289	74592443	+	88	34	142	-2.03059
ENSMUSG00000020635	Fkbp1b	protein_coding	chr12	4833174	4841591	-	60	23	97	-2.02975
ENSMUSG00000043230	Fam124b	protein_coding	chr1	80198706	80213944	-	29.5	11	48	-2.02975
ENSMUSG00000035547	Capn5	protein_coding	chr7	98121559	98178274	-	1074	422	1726	-2.02954
ENSMUSG00000021079	Timm9	protein_coding	chr12	71123173	71136684	-	184.5	72	297	-2.02934
ENSMUSG00000038628	Polr3k	protein_coding	chr2	181864337	181870830	+	479	188	770	-2.02834
ENSMUSG00000044867	Gimap1os	processed_transcript	chr6	48738346	48740621	-	32	12	52	-2.02748
ENSMUSG00000031985	Gnpat	protein_coding	chr8	124863033	124890057	+	1440.5	567	2314	-2.02705
ENSMUSG00000108563	Gm44686	antisense_RNA	chr7	73538013	73554801	+	37	14	60	-2.02385
ENSMUSG00000022814	Umps	protein_coding	chr16	33954782	33967038	-	761	300	1222	-2.02259
ENSMUSG00000064816	Gm22357	snoRNA	chr1	161036057	161036139	+	39.5	15	64	-2.02237
ENSMUSG00000048696	Mex3d	protein_coding	chr10	80380355	80387659	-	927	366	1488	-2.02049
ENSMUSG00000021245	Mlh3	protein_coding	chr12	85234520	85270599	-	1007.5	398	1617	-2.01975
ENSMUSG00000020413	Hus1	protein_coding	chr11	8993137	9011191	-	640.5	253	1028	-2.01834
ENSMUSG00000031565	Fgfr1	protein_coding	chr8	25518759	25575718	+	5565	2203	8927	-2.01821
ENSMUSG00000020015	Cdk17	protein_coding	chr10	93160890	93241328	+	3612.5	1430	5795	-2.01803
ENSMUSG00000031799	Tpm4	protein_coding	chr8	72135259	72153142	+	29037	11509	46565	-2.01639
ENSMUSG00000041012	Cmtm8	protein_coding	chr9	114789345	114844152	-	276.5	109	444	-2.0163
ENSMUSG00000050064	Zfp697	protein_coding	chr3	98382481	98431951	+	1484.5	588	2381	-2.01583
ENSMUSG00000025758	Plk4	protein_coding	chr3	40800019	40816883	+	889	352	1426	-2.01525
ENSMUSG00000024056	Ndc80	protein_coding	chr17	71496100	71526857	-	536	212	860	-2.01516
ENSMUSG00000028005	Gucy1b3	protein_coding	chr3	82032006	82074689	-	125	49	201	-2.01436
ENSMUSG00000054720	Lrrc8c	protein_coding	chr5	105519388	105613018	+	4640.5	1841	7440	-2.01422
ENSMUSG00000037640	Zfp60	protein_coding	chr7	27731389	27753702	+	664	263	1065	-2.0136
ENSMUSG00000071661	Zbtb3	protein_coding	chr19	8802530	8804854	+	79.5	31	128	-2.01123
ENSMUSG00000049858	Suox	protein_coding	chr10	128669894	128674073	-	87	34	140	-2.01027
ENSMUSG00000045877	4933415A04Rik	protein_coding	chr11	43587040	43589048	+	87	34	140	-2.01027
ENSMUSG00000031109	Enox2	protein_coding	chrX	49009707	49288242	-	891	354	1428	-2.00911
ENSMUSG00000003929	Zfp81	protein_coding	chr17	33329342	33358878	-	780	310	1250	-2.0081
ENSMUSG00000028634	Hivep3	protein_coding	chr4	119733796	120138045	+	806	321	1291	-2.00447
ENSMUSG00000032501	Trib1	protein_coding	chr15	59648350	59656550	+	1625.5	648	2603	-2.00444
ENSMUSG00000020154	Ptprb	protein_coding	chr10	116275550	116389535	+	10929	4370	17488	-2.00041
ENSMUSG00000020309	Chac2	protein_coding	chr11	30976707	30986350	-	354	141	567	-2
ENSMUSG00000073988	Ttpa	protein_coding	chr4	20008007	20030785	+	314	125	503	-2
ENSMUSG00000090671	Gm5067	processed_pseudogene	chr5	26007027	26008035	+	236.5	94	379	-2
ENSMUSG00000027384	Ndufaf5	protein_coding	chr2	140170649	140203689	+	169	67	271	-2
ENSMUSG00000050705	2310061I04Rik	protein_coding	chr17	35892677	35897431	-	154	61	247	-2
ENSMUSG00000045165	AI467606	protein_coding	chr7	127091359	127093986	+	111.5	44	179	-2
ENSMUSG00000097597	Gm26674	antisense_RNA	chr10	8884637	8886878	+	99	39	159	-2
ENSMUSG00000050022	Amz1	protein_coding	chr5	140724127	140754691	+	56.5	22	91	-2
ENSMUSG00000007867	Ift43	protein_coding	chr12	86082563	86162459	+	56.5	22	91	-2
ENSMUSG00000099708	Gm29361	antisense_RNA	chr12	83631834	83633833	-	36.5	14	59	-2
ENSMUSG00000054967	Zfp647	protein_coding	chr15	76910851	76918010	-	34	13	55	-2
ENSMUSG00000105940	Gm42635	TEC	chr5	57724393	57726963	+	31.5	12	51	-2
ENSMUSG00000097277	2900076A07Rik	lincRNA	chr7	81523563	81531498	+	26.5	10	43	-2
ENSMUSG00000105572	Gm43300	TEC	chr3	119727748	119729790	-	21.5	8	35	-2
ENSMUSG00000097027	Gm26559	bidirectional_promoter_lncRNA	chr13	99516629	99521760	+	16.5	6	27	-2
ENSMUSG00000009210	Prr29	protein_coding	chr11	106365472	106377558	+	16.5	6	27	-2
ENSMUSG00000073555	Gm4951	protein_coding	chr18	60212080	60247820	+	14	5	23	-2
ENSMUSG00000065228	Gm25789	snoRNA	chr1	161038308	161038383	+	14	5	23	-2
ENSMUSG00000027071	P2rx3	protein_coding	chr2	84998583	85037462	-	14	5	23	-2
ENSMUSG00000089636	1700058P15Rik	antisense_RNA	chr7	19258492	19259739	+	11.5	4	19	-2
ENSMUSG00000087439	Gm15788	antisense_RNA	chr5	110262161	110277267	+	11.5	4	19	-2
ENSMUSG00000084667	Gm23212	snoRNA	chr1	161036682	161036741	+	11.5	4	19	-2
ENSMUSG00000113385	AC101875.1	TEC	chr12	110885935	110888157	-	9	3	15	-2
ENSMUSG00000106337	Gm42478	TEC	chr5	57929750	57931216	+	9	3	15	-2
ENSMUSG00000104871	Gm42639	TEC	chr5	57945042	57946912	+	9	3	15	-2
ENSMUSG00000091438	Gm17088	antisense_RNA	chr6	134168879	134172007	-	9	3	15	-2
ENSMUSG00000103596	Gm37354	TEC	chr1	33922455	33924838	+	6.5	2	11	-2
ENSMUSG00000100130	Gm28379	antisense_RNA	chr9	66417746	66448496	-	6.5	2	11	-2
ENSMUSG00000097672	Gm26609	lincRNA	chr9	62804478	62808234	+	6.5	2	11	-2
ENSMUSG00000095913	Gm21844	antisense_RNA	chr19	4801512	4805784	+	6.5	2	11	-2
ENSMUSG00000077611	Gm23946	snoRNA	chr14	32191854	32192050	-	6.5	2	11	-2
ENSMUSG00000077167	Gm24119	snoRNA	chr10	91118291	91118536	-	6.5	2	11	-2
ENSMUSG00000074250	Gm10653	transcribed_processed_pseudogene	chr9	62841477	62868000	-	6.5	2	11	-2
ENSMUSG00000074203	G430095P16Rik	protein_coding	chr8	84723007	84726844	+	6.5	2	11	-2
ENSMUSG00000073733	Rsg1	protein_coding	chr4	141213956	141220148	+	6.5	2	11	-2
ENSMUSG00000061991	Hist1h2af	protein_coding	chr13	23533906	23534304	+	6.5	2	11	-2
ENSMUSG00000038020	Rapgefl1	protein_coding	chr11	98836785	98853697	+	6.5	2	11	-2
ENSMUSG00000002699	Lcp2	protein_coding	chr11	34046920	34092295	+	6.5	2	11	-2
ENSMUSG00000113036	AC139941.1	processed_pseudogene	chr13	12259793	12260270	-	4	1	7	-2
ENSMUSG00000110648	Gm38574	processed_pseudogene	chr8	126981593	126982232	-	4	1	7	-2
ENSMUSG00000110278	Gm5608	lincRNA	chr8	13537678	13547028	-	4	1	7	-2
ENSMUSG00000109863	Gm45643	TEC	chr8	90893155	90894638	+	4	1	7	-2
ENSMUSG00000108695	Gm2511	lincRNA	chr7	43511165	43518970	-	4	1	7	-2
ENSMUSG00000108689	Gm45354	TEC	chr3	90335395	90337951	+	4	1	7	-2
ENSMUSG00000108547	Gm45186	processed_pseudogene	chr7	97654276	97654753	-	4	1	7	-2
ENSMUSG00000108219	Gm44101	TEC	chr6	108470355	108472575	-	4	1	7	-2
ENSMUSG00000104720	Gm43138	sense_intronic	chr5	110206580	110207287	+	4	1	7	-2
ENSMUSG00000103012	Gm37548	TEC	chr3	50883246	50887059	-	4	1	7	-2
ENSMUSG00000102674	8030442B05Rik	lincRNA	chr2	11338366	11398501	-	4	1	7	-2
ENSMUSG00000102509	Gm37368	TEC	chr1	133775210	133778421	-	4	1	7	-2
ENSMUSG00000098413	Mir6990	miRNA	chr19	6914196	6914286	-	4	1	7	-2
ENSMUSG00000098002	Gm9658	processed_pseudogene	chr15	43217150	43218161	-	4	1	7	-2
ENSMUSG00000096006	Gm21596	processed_pseudogene	chr2	113919247	113920562	-	4	1	7	-2
ENSMUSG00000094852	Gm9034	processed_pseudogene	chr10	43821231	43822235	+	4	1	7	-2
ENSMUSG00000085229	Gm11672	antisense_RNA	chr11	106126336	106127351	-	4	1	7	-2
ENSMUSG00000083670	Gm6829	processed_pseudogene	chrX	9327749	9328108	-	4	1	7	-2
ENSMUSG00000083443	Gm15519	processed_pseudogene	chr6	112563642	112565207	+	4	1	7	-2
ENSMUSG00000081782	Gm15152	processed_pseudogene	chrX	151005870	151006528	+	4	1	7	-2
ENSMUSG00000081574	Gm14429	unprocessed_pseudogene	chr2	177852152	177855503	-	4	1	7	-2
ENSMUSG00000081043	Gm11512	processed_pseudogene	chr11	90538484	90539146	-	4	1	7	-2
ENSMUSG00000074978	Actg-ps1	processed_pseudogene	chr8	46228994	46230117	+	4	1	7	-2
ENSMUSG00000065396	Mir99b	miRNA	chr17	17830188	17830257	+	4	1	7	-2
ENSMUSG00000064525	Gm26440	snoRNA	chr14	57697809	57697937	+	4	1	7	-2
ENSMUSG00000059049	Frem1	protein_coding	chr4	82897920	83052339	-	4	1	7	-2
ENSMUSG00000046997	Spsb4	protein_coding	chr9	96943482	97018843	-	4	1	7	-2
ENSMUSG00000042976	9930038B18Rik	lincRNA	chr12	8873187	8893473	-	4	1	7	-2
ENSMUSG00000020907	Rcvrn	protein_coding	chr11	67695326	67703333	+	4	1	7	-2
ENSMUSG00000006777	Krt23	protein_coding	chr11	99477974	99493137	-	4	1	7	-2
ENSMUSG00000041650	Pcca	protein_coding	chr14	122534339	122889944	+	451	180	722	-1.99801
ENSMUSG00000015944	Gatsl2	protein_coding	chr5	134099711	134144343	+	1664	666	2662	-1.99729
ENSMUSG00000029863	Casp2	protein_coding	chr6	42264985	42282508	+	520.5	208	833	-1.99654
ENSMUSG00000041361	Myzap	protein_coding	chr9	71504347	71592360	-	580	232	928	-1.99535
ENSMUSG00000086583	Gm15500	transcribed_processed_pseudogene	chr7	114705217	114706235	-	425	170	680	-1.99366
ENSMUSG00000060261	Gtf2i	protein_coding	chr5	134237834	134314760	-	3660	1469	5851	-1.99311
ENSMUSG00000033066	Gas7	protein_coding	chr11	67455437	67688990	+	10892	4373	17411	-1.99306
ENSMUSG00000020652	Cenpo	protein_coding	chr12	4197822	4234294	-	106	42	170	-1.99159
ENSMUSG00000028232	Tmem68	protein_coding	chr4	3549041	3574853	-	501.5	201	802	-1.99104
ENSMUSG00000004980	Hnrnpa2b1	protein_coding	chr6	51460932	51469894	-	10988	4420	17556	-1.9896
ENSMUSG00000064368	mt-Nd6	protein_coding	chrM	13552	14070	-	21845.5	8789	34902	-1.98942
ENSMUSG00000048763	Hoxb3	protein_coding	chr11	96323326	96347930	+	61	24	98	-1.9855
ENSMUSG00000022309	Angpt1	protein_coding	chr15	42424727	42676977	-	43.5	17	70	-1.97982
ENSMUSG00000070972	Dnajc25	protein_coding	chr4	58995114	59025573	+	686	277	1095	-1.97909
ENSMUSG00000049928	Glp2r	protein_coding	chr11	67661502	67771153	-	41	16	66	-1.97863
ENSMUSG00000051149	Adnp	protein_coding	chr2	168180986	168207112	-	157	63	251	-1.97728
ENSMUSG00000019997	Ctgf	protein_coding	chr10	24595442	24598683	+	22402	9074	35730	-1.97721
ENSMUSG00000021177	Tdp1	protein_coding	chr12	99884537	99955219	+	154.5	62	247	-1.97692
ENSMUSG00000036078	Sigmar1	protein_coding	chr4	41738493	41741359	-	1043	422	1664	-1.97679
ENSMUSG00000099397	Gm7809	processed_pseudogene	chr17	21967501	21968242	-	226	91	361	-1.97628
ENSMUSG00000043342	Hoxd9	protein_coding	chr2	74697727	74700208	+	299.5	121	478	-1.97314
ENSMUSG00000085385	Snhg17	processed_transcript	chr2	158353700	158361580	-	193.5	78	309	-1.97234
ENSMUSG00000020692	Nle1	protein_coding	chr11	82900768	82908411	-	193.5	78	309	-1.97234
ENSMUSG00000062729	Ppox	protein_coding	chr1	171276992	171281186	-	60.5	24	97	-1.97085
ENSMUSG00000026589	Sec16b	protein_coding	chr1	157506728	157568425	+	119.5	48	191	-1.97025
ENSMUSG00000032047	Acat1	protein_coding	chr9	53580522	53610382	-	721.5	293	1150	-1.969
ENSMUSG00000074934	Grem1	protein_coding	chr2	113746164	113758646	-	782.5	318	1247	-1.96799
ENSMUSG00000026097	Ormdl1	protein_coding	chr1	53297095	53310309	+	50.5	20	81	-1.96523
ENSMUSG00000026121	Sema4c	protein_coding	chr1	36548639	36558349	-	734.5	299	1170	-1.96471
ENSMUSG00000030750	Nsmce1	protein_coding	chr7	125467640	125491596	-	543	221	865	-1.96381
ENSMUSG00000024120	Lrpprc	protein_coding	chr17	84705247	84790558	-	2816.5	1149	4484	-1.96347
ENSMUSG00000004661	Arid3b	protein_coding	chr9	57790353	57836793	-	72.5	29	116	-1.96347
ENSMUSG00000026039	Sgo2a	protein_coding	chr1	57995971	58025899	+	1207.5	493	1922	-1.96078
ENSMUSG00000028678	Kif2c	protein_coding	chr4	117159639	117182639	-	375.5	153	598	-1.95963
ENSMUSG00000042660	Wdr55	protein_coding	chr18	36760239	36763708	+	263	107	419	-1.95936
ENSMUSG00000031149	Praf2	protein_coding	chrX	7728439	7731064	+	170	69	271	-1.95818
ENSMUSG00000019189	Rnf145	protein_coding	chr11	44518964	44565520	+	4078	1669	6487	-1.95793
ENSMUSG00000092281	Hmgb1-ps7	processed_pseudogene	chr7	42020836	42021483	+	40.5	16	65	-1.95693
ENSMUSG00000051285	Pcmtd1	protein_coding	chr1	7088920	7173628	+	3399	1392	5406	-1.95663
ENSMUSG00000004655	Aqp1	protein_coding	chr6	55336432	55348555	+	26190	10740	41640	-1.95488
ENSMUSG00000025574	Tk1	protein_coding	chr11	117815526	117826092	-	177	72	282	-1.95483
ENSMUSG00000031333	Abcb7	protein_coding	chrX	104280657	104413846	-	1691	693	2689	-1.9546
ENSMUSG00000106022	Gm42929	TEC	chr3	121428046	121429331	+	18.5	7	30	-1.9542
ENSMUSG00000105395	Gm42672	processed_pseudogene	chr3	95461191	95461542	+	18.5	7	30	-1.9542
ENSMUSG00000017969	Ptgis	protein_coding	chr2	167191805	167240604	-	35.5	14	57	-1.95109
ENSMUSG00000026355	Mcm6	protein_coding	chr1	128331590	128359664	-	1376.5	566	2187	-1.94819
ENSMUSG00000037225	Fgf2	protein_coding	chr3	37348346	37410108	+	2054	845	3263	-1.94791
ENSMUSG00000086121	Gm16068	antisense_RNA	chr19	47606144	47617106	-	16	6	26	-1.94753
ENSMUSG00000083688	Gm13743	processed_pseudogene	chr2	87562997	87563720	-	16	6	26	-1.94753
ENSMUSG00000043943	Naalad2	protein_coding	chr9	18321951	18397538	-	16	6	26	-1.94753
ENSMUSG00000031637	Lrp2bp	protein_coding	chr8	45999303	46029477	+	16	6	26	-1.94753
ENSMUSG00000026785	Pkn3	protein_coding	chr2	30078584	30091019	+	1064.5	438	1691	-1.94644
ENSMUSG00000026773	Pfkfb3	protein_coding	chr2	11471433	11554077	-	1248	514	1982	-1.94504
ENSMUSG00000034021	Pds5b	protein_coding	chr5	150673739	150810690	+	2302.5	949	3656	-1.94466
ENSMUSG00000076437	Selenoh	protein_coding	chr2	84669215	84670770	-	139.5	57	222	-1.94292
ENSMUSG00000046020	Pofut1	protein_coding	chr2	153241533	153270247	+	1129.5	466	1793	-1.94169
ENSMUSG00000026942	Traf2	protein_coding	chr2	25517982	25546940	-	284.5	117	452	-1.94072
ENSMUSG00000023044	Csad	protein_coding	chr15	102176998	102189043	-	267.5	110	425	-1.94029
ENSMUSG00000026393	Nek7	protein_coding	chr1	138482875	138620141	-	4709	1947	7471	-1.9395
ENSMUSG00000040818	Dennd6a	protein_coding	chr14	26573856	26634322	+	1411	583	2239	-1.93946
ENSMUSG00000031586	Rbpms	protein_coding	chr8	33782643	33929863	-	1952.5	807	3098	-1.93938
ENSMUSG00000108142	Gm7498	processed_pseudogene	chr6	84031588	84032671	+	13.5	5	22	-1.9386
ENSMUSG00000053181	A830005F24Rik	protein_coding	chr13	48513570	48514859	+	13.5	5	22	-1.9386
ENSMUSG00000018697	Aatf	protein_coding	chr11	84422855	84513522	-	315.5	130	501	-1.93812
ENSMUSG00000031765	Mt1	protein_coding	chr8	94179082	94180327	+	25.5	10	41	-1.93289
ENSMUSG00000027339	Rassf2	protein_coding	chr2	131989415	132030202	-	25.5	10	41	-1.93289
ENSMUSG00000059834	Sclt1	protein_coding	chr3	41626720	41742514	-	461.5	191	732	-1.93271
ENSMUSG00000028329	Xpa	protein_coding	chr4	46155347	46196311	-	348	144	552	-1.93123
ENSMUSG00000032766	Gng11	protein_coding	chr6	4003904	4008445	+	2601	1081	4121	-1.92964
ENSMUSG00000041477	Dcp1b	protein_coding	chr6	119175253	119221616	+	49.5	20	79	-1.92961
ENSMUSG00000030545	Pex11a	protein_coding	chr7	79735957	79743080	-	61.5	25	98	-1.92892
ENSMUSG00000046432	Bex3	protein_coding	chrX	136270253	136271978	+	2457	1022	3892	-1.92808
ENSMUSG00000036599	Chst12	protein_coding	chr5	140505550	140525724	+	885.5	368	1403	-1.92785
ENSMUSG00000073591	Pcdhb22	protein_coding	chr18	37517871	37524479	+	537	223	851	-1.92735
ENSMUSG00000097616	1110019D14Rik	lincRNA	chr6	13871569	13896422	+	71	29	113	-1.926
ENSMUSG00000019080	Mfsd3	protein_coding	chr15	76701542	76704239	+	23	9	37	-1.926
ENSMUSG00000087060	Eldr	processed_transcript	chr11	16935154	16951099	-	11	4	18	-1.926
ENSMUSG00000072653	Zfp783	transcribed_unprocessed_pseudogene	chr6	47943171	47955913	+	11	4	18	-1.926
ENSMUSG00000063698	Sfxn4	protein_coding	chr19	60838748	60861479	-	11	4	18	-1.926
ENSMUSG00000047619	Ddi1	protein_coding	chr9	6262733	6269846	-	11	4	18	-1.926
ENSMUSG00000046993	Gm5637	processed_pseudogene	chrX	60045111	60046229	-	11	4	18	-1.926
ENSMUSG00000018659	Pnpo	protein_coding	chr11	96937825	96943986	-	116.5	48	185	-1.92445
ENSMUSG00000022052	Ppp2r2a	protein_coding	chr14	67014056	67072444	-	6120	2553	9687	-1.92344
ENSMUSG00000047264	Zfp358	protein_coding	chr8	3493138	3497208	+	195.5	81	310	-1.92322
ENSMUSG00000033458	Fan1	protein_coding	chr7	64346758	64374080	-	284	118	450	-1.92217
ENSMUSG00000064345	mt-Nd2	protein_coding	chrM	3914	4951	+	11749	4908	18590	-1.9211
ENSMUSG00000040447	Spns2	protein_coding	chr11	72451638	72489904	-	6784.5	2834	10735	-1.92104
ENSMUSG00000090093	Gm14399	protein_coding	chr2	175129493	175142012	-	54	22	86	-1.91938
ENSMUSG00000039512	Uhrf1bp1	protein_coding	chr17	27856490	27900040	+	1053.5	440	1667	-1.91927
ENSMUSG00000022537	Tmem44	protein_coding	chr16	30513691	30550578	-	195	81	309	-1.91857
ENSMUSG00000022517	Mgrn1	protein_coding	chr16	4886100	4938296	+	1064.5	445	1684	-1.91763
ENSMUSG00000102742	Pcdhga11	protein_coding	chr18	37755731	37841873	+	20.5	8	33	-1.91754
ENSMUSG00000053641	Dennd4a	protein_coding	chr9	64811340	64919667	+	2012	842	3182	-1.91678
ENSMUSG00000044847	Lsm11	protein_coding	chr11	45928269	45944935	-	326	136	516	-1.91599
ENSMUSG00000031422	Morf4l2	protein_coding	chrX	136732942	136743690	-	4400	1843	6957	-1.91583
ENSMUSG00000046561	Arsj	protein_coding	chr3	126363684	126440375	+	185	77	293	-1.91427
ENSMUSG00000052852	Reep1	protein_coding	chr6	71707561	71810710	+	2190	918	3462	-1.91389
ENSMUSG00000015745	Plekho1	protein_coding	chr3	95988429	95996001	-	430.5	180	681	-1.91378
ENSMUSG00000033326	Kdm4a	protein_coding	chr4	118136957	118180043	-	2045.5	858	3233	-1.91259
ENSMUSG00000033906	Zdhhc15	protein_coding	chrX	104536969	104671064	-	49	20	78	-1.91146
ENSMUSG00000030064	Frmd4b	protein_coding	chr6	97286867	97617541	-	2558.5	1074	4043	-1.91145
ENSMUSG00000020156	Mum1	protein_coding	chr10	80226434	80243903	+	563	236	890	-1.91054
ENSMUSG00000031486	Adgra2	protein_coding	chr8	27085583	27123436	+	2464	1035	3893	-1.91023
ENSMUSG00000022881	Rfc4	protein_coding	chr16	23113943	23127737	-	225	94	356	-1.90992
ENSMUSG00000078496	Zfp982	protein_coding	chr4	147492417	147513486	+	56	23	89	-1.90689
ENSMUSG00000045466	Zfp956	protein_coding	chr6	47953390	47965300	+	46.5	19	74	-1.90689
ENSMUSG00000097207	6030443J06Rik	lincRNA	chr5	22550432	22807850	+	37	15	59	-1.90689
ENSMUSG00000093798	Gm8355	processed_pseudogene	chr10	14745362	14747302	-	18	7	29	-1.90689
ENSMUSG00000066233	Tmem42	protein_coding	chr9	123021326	123023705	+	18	7	29	-1.90689
ENSMUSG00000110181	Gm45508	TEC	chr7	16403964	16404262	-	8.5	3	14	-1.90689
ENSMUSG00000106706	C530043K16Rik	TEC	chr5	66592462	66595570	-	8.5	3	14	-1.90689
ENSMUSG00000063314	Gm12657	processed_pseudogene	chr4	94599385	94599795	+	8.5	3	14	-1.90689
ENSMUSG00000029636	Wasf3	protein_coding	chr5	146384985	146473615	+	8.5	3	14	-1.90689
ENSMUSG00000034158	Lrrc58	protein_coding	chr16	37868389	37888858	+	13346	5622	21070	-1.90585
ENSMUSG00000046324	Ermp1	protein_coding	chr19	29608214	29648415	-	9645.5	4064	15227	-1.9054
ENSMUSG00000020899	Pfas	protein_coding	chr11	68985697	69008460	-	1117.5	471	1764	-1.90281
ENSMUSG00000023027	Atf1	protein_coding	chr15	100227819	100261244	+	551	232	870	-1.90234
ENSMUSG00000057894	Zfp329	protein_coding	chr7	12804977	12818858	-	809	341	1277	-1.90182
ENSMUSG00000049775	Tmsb4x	protein_coding	chrX	167207093	167209315	-	23014	9717	36311	-1.90172
ENSMUSG00000048327	Ckap2l	protein_coding	chr2	129268210	129297212	-	565	238	892	-1.90165
ENSMUSG00000044948	Cfap43	protein_coding	chr19	47737561	47919299	-	2106.5	890	3323	-1.89942
ENSMUSG00000031078	Cttn	protein_coding	chr7	144435733	144471009	-	9698.5	4100	15297	-1.8993
ENSMUSG00000001627	Ifrd1	protein_coding	chr12	40201567	40223189	-	1786.5	755	2818	-1.89873
ENSMUSG00000004665	Cnn2	protein_coding	chr10	79988584	79996062	+	4523.5	1913	7134	-1.89832
ENSMUSG00000108238	Gm43984	TEC	chr6	134084601	134087464	+	25	10	40	-1.89812
ENSMUSG00000030282	Cmas	protein_coding	chr6	142756686	142775714	+	1795	759	2831	-1.89775
ENSMUSG00000038393	Txnip	protein_coding	chr3	96557957	96561883	+	4040.5	1711	6370	-1.89584
ENSMUSG00000042688	Mapk6	protein_coding	chr9	75386902	75410005	-	11277.5	4779	17776	-1.89493
ENSMUSG00000018363	Smurf2	protein_coding	chr11	106820066	106920715	-	12508	5303	19713	-1.89407
ENSMUSG00000033446	Lpar6	protein_coding	chr14	73237895	73243294	+	1663.5	705	2622	-1.89348
ENSMUSG00000022022	Mtrf1	protein_coding	chr14	79397772	79423650	+	180.5	76	285	-1.89308
ENSMUSG00000027165	B230118H07Rik	protein_coding	chr2	101560781	101649532	-	98	41	155	-1.89308
ENSMUSG00000108737	BC060293	TEC	chr7	34250252	34251355	-	15.5	6	25	-1.89308
ENSMUSG00000105604	Gm42838	antisense_RNA	chr5	125057841	125058370	+	15.5	6	25	-1.89308
ENSMUSG00000034601	2700049A03Rik	protein_coding	chr12	71136848	71243303	+	392.5	166	619	-1.89242
[truncated: 18,448 more rows]
